# Supplementary material for: The VINE complex is an endosomal VPS9-domain GEF and SNX-BAR coat
Source: eLife. 2022 Aug 8;11:e77035. doi: 10.7554/eLife.77035 (PMC9507130; doi:10.7554/eLife.77035)
Supplement: Figure 1—source data 1. [file elife-77035-fig1-data1.xlsx]

## Sheet:  Figure 1D
	% of Vrl1 Puncta that Colocalize with RFP
	Rep1	Rep2	Rep3	Average	SEM
DID2-mRuby2 + pVRL1-Envy	55.7887	52.7473	58.0674	55.5344	1.54104
SEC7-dsRed + pVRL1-Envy	1.41608	1.75277	1.55989	1.57624	0.0975377
