# Supplementary material for: The VINE complex is an endosomal VPS9-domain GEF and SNX-BAR coat
Source: eLife. 2022 Aug 8;11:e77035. doi: 10.7554/eLife.77035 (PMC9507130; doi:10.7554/eLife.77035)
Supplement: Figure 1—source data 2. [file elife-77035-fig1-data2.xlsx]

## Sheet: Figure 1G
Highest Hierarchical Subclass GO Terms with Fold Enrichment > 25 (http://geneontology.org)
Ontological Class	GO Term	NegLog10(P)	Bonferroni-corrected P-value (binomial test)	Fold Enrichment
Cellular Component	Ragulator complex (GO:0071986)	1.53611	0.0291	46.53
Cellular Component	Retromer complex (GO:0030904)	1.53611	0.0291	46.53
Cellular Component	HOPS complex (GO:0030897)	3.08672	0.000819	53.18
Cellular Component	CORVET complex (GO:0033263)	5.26841	5.39e-06	77.55
Biological Process	Regulation of SNARE complex assembly (GO:0035542)	2.17653	0.00666	41.36
Biological Process	Golgi to endosome transport (GO:0006895)	7.70553	1.97e-08	33.5
