# Supplementary material for: The VINE complex is an endosomal VPS9-domain GEF and SNX-BAR coat
Source: eLife. 2022 Aug 8;11:e77035. doi: 10.7554/eLife.77035 (PMC9507130; doi:10.7554/eLife.77035)
Supplement: Figure 2—figure supplement 1—source data 1. [file elife-77035-fig2-figsupp1-data1.xlsx]

## Sheet: Figure 2 S1C
	Rep1	Rep2	Rep3	Average	SEM
VIN1-Envy + pADH1pr-VRL1	0.937718	0.98367	0.993788	0.971725	0.0172527
VIN1-Envy + pVRL1pr-VRL1	0.662284	0.608943	0.495519	0.588915	0.0491713
VIN1-Envy vrl1 (pEmpty)	0.114602	0.123999	0.0586633	0.0990878	0.0203935
WT	0.0384131	0.034856	0.0335962	0.0356218	0.00144228
