# Supplementary material for: The VINE complex is an endosomal VPS9-domain GEF and SNX-BAR coat
Source: eLife. 2022 Aug 8;11:e77035. doi: 10.7554/eLife.77035 (PMC9507130; doi:10.7554/eLife.77035)
Supplement: Figure 2—source data 1. [file elife-77035-fig2-data1.xlsx]

## Sheet: Figure 2C
	Replicate 1	Replicate 2	Replicate 3	Mean	SEM
WT	0.0120366	0.0384725	0.0364872	0.0289988	0.00850041
WT + pVRL1-Envy	0.634071	0.583057	0.772191	0.663106	0.0564952
vin1 KO + pVRL1-Envy	0.0230335	0.0365596	0.0322562	0.0306164	0.0039898
VIN1-Envy + pVRL1	0.568724	0.59813	0.511173	0.559342	0.0255368
VIN1-Envy + pEmpty	0.0982622	0.0754807	0.0822541	0.0853323	0.00675414
