# Supplementary material for: The VINE complex is an endosomal VPS9-domain GEF and SNX-BAR coat
Source: eLife. 2022 Aug 8;11:e77035. doi: 10.7554/eLife.77035 (PMC9507130; doi:10.7554/eLife.77035)
Supplement: Figure 2—source data 2. [file elife-77035-fig2-data2.xlsx]

## Sheet: Figure 2E
		Replicate 1	Replicate 2	Replicate 3	Mean (relative to WT)	SEM
pVRL1-3HA	vin1 KO	16.8904	14.2396	20.8434	17.3245	1.91866
	Normalized WT	100	100	100	100	0
VIN1-3HA	vrl1 KO (pEmpty)	13.7829	14.8658	24.9444	17.8644	3.55381
	Normalized WT	100	100	100	100	0
