# Supplementary material for: The VINE complex is an endosomal VPS9-domain GEF and SNX-BAR coat
Source: eLife. 2022 Aug 8;11:e77035. doi: 10.7554/eLife.77035 (PMC9507130; doi:10.7554/eLife.77035)
Supplement: Figure 2—source data 3. [file elife-77035-fig2-data3.xlsx]

## Sheet: Figure 2G
	% of bright GFP that coloc with RFP
	Replicate 1	Replicate 2	Replicate 3	Average	SEM
vrl1 vin1 KO pVRL1-Envy pVIN1-mScI	81.8182	89.4118	93.0556	88.0952	3.31007
