# Supplementary material for: The VINE complex is an endosomal VPS9-domain GEF and SNX-BAR coat
Source: eLife. 2022 Aug 8;11:e77035. doi: 10.7554/eLife.77035 (PMC9507130; doi:10.7554/eLife.77035)
Supplement: Figure 2—source data 4. [file elife-77035-fig2-data4.xlsx]

## Sheet: Figure 2I
	Replicate 1	Replicate 2	Replicate 3	Mean	SEM
WT + Empty	0.168304	0.0085801	0.0162176	0.0643672	0.0520151
WT + pVRL1-Envy	0.75317	0.629004	0.604113	0.662096	0.0461007
vps34 KO + pVRL1-Envy	0.304179	0.203732	0.211667	0.239859	0.0322416
