# Supplementary material for: The VINE complex is an endosomal VPS9-domain GEF and SNX-BAR coat
Source: eLife. 2022 Aug 8;11:e77035. doi: 10.7554/eLife.77035 (PMC9507130; doi:10.7554/eLife.77035)
Supplement: Figure 2—source data 5. [file elife-77035-fig2-data5.xlsx]

## Sheet: Figure 2K
		Replicate 1	Replicate 2	Replicate 3	Mean	SEM
MUK1VPS9	WT VRL1-Envy	0.753642	0.988325	0.840582	0.86085	0.0685009
	D373A VRL1-Envy	0.786356	0.899486	0.779388	0.821743	0.0389231
muk1 KO vps9 KO	WT VRL1-Envy	0.659519	0.683167	0.595789	0.646159	0.0260936
	D373A VRL1-Envy	0.215347	0.183101	0.196775	0.198408	0.0093443
