# Supplementary material for: The VINE complex is an endosomal VPS9-domain GEF and SNX-BAR coat
Source: eLife. 2022 Aug 8;11:e77035. doi: 10.7554/eLife.77035 (PMC9507130; doi:10.7554/eLife.77035)
Supplement: Figure 3—figure supplement 3—source data 1. [file elife-77035-fig3-figsupp3-data1.xlsx]

## Sheet: Figure 3 S3D
		Average Vps35-GFP puncta/cell
Strain Genotype	Vrl1 Plasmid	Rep1	Rep2	Rep3	Average	SEM
WT	vrl1 (pEmpty)	0.577219	0.930725	0.808716	0.77222	0.103667
	pADH1pr-Vrl1	0.655086	0.71898	0.941184	0.77175	0.0867016
vps5KO	vrl1 (pEmpty)	0.0512216	0.246988	0.397546	0.231918	0.100259
	pADH1pr-Vrl1	0.16646	0.169983	0.214723	0.183722	0.0155338
vps17KO	vrl1 (pEmpty)	0.139748	0.173377	0.241611	0.184912	0.0299658
	pADH1pr-Vrl1	0.132001	0.14168	0.161089	0.144923	0.00855202
vps5KOvps17KO	vrl1 (pEmpty)	0.143858	0.210537	0.264607	0.206334	0.0349203
	pADH1pr-Vrl1	0.138953	0.220105	0.239445	0.199501	0.0307843
