# Supplementary material for: The VINE complex is an endosomal VPS9-domain GEF and SNX-BAR coat
Source: eLife. 2022 Aug 8;11:e77035. doi: 10.7554/eLife.77035 (PMC9507130; doi:10.7554/eLife.77035)
Supplement: Figure 3—source data 1. [file elife-77035-fig3-data1.xlsx]

## Sheet: Figure 3B
	Average pTMScore of BAR-BAR Dimers
	Vrl1	Vin1	Vps5	Vps17	Mvp1
Vrl1	0	0.68152	0.7674	0	0
Vin1	0.68152	0.09222	0.65084	0.4011	0
Vps5	0.7674	0.65084	0.7758	0.80088	0
Vps17	0	0.4011	0.80088	0.76882	0
Mvp1	0	0	0	0	0.84778
