# Supplementary material for: The VINE complex is an endosomal VPS9-domain GEF and SNX-BAR coat
Source: eLife. 2022 Aug 8;11:e77035. doi: 10.7554/eLife.77035 (PMC9507130; doi:10.7554/eLife.77035)
Supplement: Figure 3—source data 2. [file elife-77035-fig3-data2.xlsx]

## Sheet: Figure 3G
	pVRL1-Envy Constructs	Rep 1	Rep 2	Rep 3	Mean	SEM
pVIN1-mScI in vin1 KO vrl1KO strain	Empty	0.06924	0.108181	0.149665	0.109029	0.0232207
	WT	1.56279	1.59381	1.874	1.67687	0.0989711
	D373A	1.40066	1.83613	2.01285	1.74988	0.181911
	158-end	1.02112	0.688313	0.689466	0.799634	0.110745
	1-465	0.270634	0.296434	0.138492	0.235187	0.0489175
	1-465^YPE	0.181153	0.142109	0.124628	0.149297	0.0167085
	1-703^YPE	1.07988	1.35151	1.41872	1.28337	0.103576
	465-end	0.778718	0.351482	0.462923	0.531041	0.127949
	700-end	0.139076	0.214398	0.184831	0.179435	0.0219102
