# Supplementary material for: The VINE complex is an endosomal VPS9-domain GEF and SNX-BAR coat
Source: eLife. 2022 Aug 8;11:e77035. doi: 10.7554/eLife.77035 (PMC9507130; doi:10.7554/eLife.77035)
Supplement: Figure 4—figure supplement 2—source data 1. [file elife-77035-fig4-figsupp2-data1.xlsx]

## Sheet: Figure 4 S2B
		RFP Puncta/Cell
		Rep1	Rep2	Rep3	Average	SEM
VIN1-mScI	YPE	0.00108411	0.000814996	0.00386016	0.00191975	0.000973307
VIN1(Nt)-mScI		0.00798049	0.00888779	0.0171118	0.0113267	0.00290438
VIN1-mScI	VRL1	0.459233	0.669319	0.766794	0.631782	0.0907473
VIN1(Nt)-mScI		0.00660549	0.0126039	0.0196384	0.0129493	0.00376623
VIN1-mScI	1-703-YPE	0.364759	0.361645	0.337961	0.354788	0.00846151
VIN1(Nt)-mScI		0.643871	0.740107	0.749204	0.711061	0.0336972
