# Supplementary material for: The VINE complex is an endosomal VPS9-domain GEF and SNX-BAR coat
Source: eLife. 2022 Aug 8;11:e77035. doi: 10.7554/eLife.77035 (PMC9507130; doi:10.7554/eLife.77035)
Supplement: Figure 4—source data 1. [file elife-77035-fig4-data1.xlsx]

## Sheet: Figure 4D
		RFP Puncta/Cell
		Rep1	Rep2	Rep3	Average	SEM
VIN1-mScI	YPE	0.00458007	0.00645602	0.00549323	0.00550977	0.000541606
VIN1(Nt)-mScI		0.00602468	0.0285645	0.0100986	0.0148959	0.00693472
VPS5(Nt)-mScI		0.0381644	0.0567948	0.0861623	0.0603738	0.0139709
VIN1-mScI	VRL1	0.384292	0.566137	0.546117	0.498849	0.057569
VIN1(Nt)-mScI		0.00975942	0.037952	0.0211397	0.0229504	0.00818869
VPS5(Nt)-mScI		0.0383107	0.109755	0.0872903	0.0784519	0.0210923
VIN1-mScI	1-703-YPE	0.197287	0.345826	0.320621	0.287911	0.0458926
VIN1(Nt)-mScI		0.543967	0.64249	0.68403	0.623496	0.0415332
VPS5(Nt)-mScI		0.0133333	0.105749	0.0930289	0.0707036	0.0289192
