# Supplementary material for: The VINE complex is an endosomal VPS9-domain GEF and SNX-BAR coat
Source: eLife. 2022 Aug 8;11:e77035. doi: 10.7554/eLife.77035 (PMC9507130; doi:10.7554/eLife.77035)
Supplement: Figure 4—source data 2. [file elife-77035-fig4-data2.xlsx]

## Sheet: Figure 4G
		RFP Puncta/Cell
VIN1-mScI Fragment	Vrl1 Constructs	Rep1	Rep2	Rep3	Average	SEM
FL	YPE	0.00946702	0.00570342	0.00879405	0.00798816	0.00115877
1-116		0.0178713	0.0195808	0.0225956	0.0200159	0.00138104
1-29		0.0229809	0.0326619	0.0273038	0.0276489	0.00279998
41-78		0.101392	0.0709325	0.0440825	0.0721355	0.0165547
76-95		0.269114	0.162352	0.128817	0.186761	0.0422995
FL	1-703^YPE	0.406662	0.274586	0.252684	0.31131	0.0480933
1-116		1.19801	0.878581	0.799343	0.958646	0.12185
1-29		0.0211215	0.0484098	0.0218176	0.0304496	0.00898231
41-78		0.0504113	0.0571793	0.0443434	0.0506447	0.00370725
76-95		0.877375	0.459729	0.517671	0.618258	0.130634
