# Supplementary material for: The VINE complex is an endosomal VPS9-domain GEF and SNX-BAR coat
Source: eLife. 2022 Aug 8;11:e77035. doi: 10.7554/eLife.77035 (PMC9507130; doi:10.7554/eLife.77035)
Supplement: Figure 5—source data 1. [file elife-77035-fig5-data1.xlsx]

## Sheet: Figure 5F
	pVRL1(1-703)^YPE Constructs	Rep 1	Rep 2	Rep 3	Mean	SEM
pVIN1(1-116)-mScI in vin1KO vrl1 strain	YPE alone	0.0376352	0.0338674	0.0565344	0.042679	0.00701258
	WT	0.807374	0.849779	0.804631	0.820594	0.0146137
	EEDNE-5A	0.0494054	0.0794839	0.0953738	0.0747543	0.013479
	E510R	0.0385496	0.0533982	0.0383015	0.0434164	0.0049914
	D511K	0.13766	0.145534	0.126625	0.136606	0.00548415
