# Supplementary material for: The VINE complex is an endosomal VPS9-domain GEF and SNX-BAR coat
Source: eLife. 2022 Aug 8;11:e77035. doi: 10.7554/eLife.77035 (PMC9507130; doi:10.7554/eLife.77035)
Supplement: Figure 6—source data 1. [file elife-77035-fig6-data1.xlsx]

## Sheet: Figure 6E
	Rep1	Rep2	Rep3	Average	SEM
WT	0	0	0.000469484	0.000156495	0.000156495
VPS26-GFP	0.389774	0.487642	0.356772	0.411396	0.0392954
VPS26-GFP muk1 KO vps9 KO	0.210549	0.077352	0.127528	0.138477	0.0388385
VPS26-GFP muk1 KO vps9 KO pVRL1	0.269961	0.340916	0.317226	0.309368	0.0208563
VPS26-GFP muk1 KO vps9 KO vin1 KO pVRL1	0.0865514	0.0543885	0.130261	0.0904004	0.0219869
