# Supplementary material for: The VINE complex is an endosomal VPS9-domain GEF and SNX-BAR coat
Source: eLife. 2022 Aug 8;11:e77035. doi: 10.7554/eLife.77035 (PMC9507130; doi:10.7554/eLife.77035)
Supplement: Figure 6—source data 2. [file elife-77035-fig6-data2.xlsx]

## Sheet: Figure 6G
Strain genotype	pVRL1-Envy Constructs	Rep1	Rep2	Rep3	Average	SEM
WT	YPE	0.682581	0.597442	0.71719	0.665738	0.0355792
	WT VRL1	0.80069	0.833286	0.787241	0.807072	0.0136698
vps9 KO muk1 KO	YPE	0.255754	0.310021	0.243308	0.269694	0.0204809
	WT VRL1	0.700344	0.671333	0.56111	0.644262	0.0424111
	D373A	0.269657	0.364156	0.340229	0.324681	0.0283655
vps9 KO muk1 KO vin1 KO	YPE	0.209741	0.262468	0.214967	0.229059	0.0167727
	WT VRL1	0.30034	0.427681	0.336083	0.354701	0.0379208
	1-465^YPE	0.636614	0.780047	0.62696	0.681207	0.0494986
	1-703^YPE	0.691482	0.816385	0.60814	0.705336	0.0605128
