# Supplementary material for: The VINE complex is an endosomal VPS9-domain GEF and SNX-BAR coat
Source: eLife. 2022 Aug 8;11:e77035. doi: 10.7554/eLife.77035 (PMC9507130; doi:10.7554/eLife.77035)
Supplement: Figure 7—figure supplement 1—source data 1. [file elife-77035-fig7-figsupp1-data1.xlsx]

## Sheet:  Figure 7 S1B
	% of Mrl1 Puncta that Colocalize with GFP Puncta
	Rep1	Rep2	Rep3	Average	SEM
Mrl1-mScI Did2-Envy	67.3469	69.9517	68.8536	68.7174	0.755004
Mrl1-mScI GFP-Vps21	40.7589	48.9121	52.8351	47.502	3.55667
Mrl1-mScI GFP-Ypt7	11.2319	8.96739	8.49315	9.56414	0.845034
