# Supplementary material for: The VINE complex is an endosomal VPS9-domain GEF and SNX-BAR coat
Source: eLife. 2022 Aug 8;11:e77035. doi: 10.7554/eLife.77035 (PMC9507130; doi:10.7554/eLife.77035)
Supplement: Figure 7—figure supplement 1—source data 2. [file elife-77035-fig7-figsupp1-data2.xlsx]

## Sheet: Figure 7 S1E
	Mrl1-mScI Puncta/Cell
	Rep1	Rep2	Rep3	Mean	SEM
MRL1-mScI vrl1	0.216691	0.222247	0.194022	0.210987	0.00863253
MRL1-mScI CRISPR VRL1	0.0648463	0.0833554	0.11912	0.0891073	0.0159292
