# Supplementary material for: The VINE complex is an endosomal VPS9-domain GEF and SNX-BAR coat
Source: eLife. 2022 Aug 8;11:e77035. doi: 10.7554/eLife.77035 (PMC9507130; doi:10.7554/eLife.77035)
Supplement: Figure 7—source data 1. [file elife-77035-fig7-data1.xlsx]

## Sheet: Figure 7B
Values normalized between 1-0
	Panel i		Panel iv		Panel vi
Line points	GFP (Vin1)	RFP (Did2)	GFP (Vin1)	RFP (Did2)	GFP (Vin1)	RFP (Did2)
0	0.0668511	0.0531582	0.0505403	0.0389467	0.114956	0.0411074
1	0	0	0	0	0	0
2	0.0518797	0.093865	0.0823343	0.024016	0.173175	0.0330224
3	0.0994383	0.0612026	0.087348	0.0247641	0.302966	0.115033
4	0.0987382	0.0789384	0.240314	0.0686252	0.450924	0.100819
5	0.115807	0.0918505	0.358307	0.130034	0.462216	0.11519
6	0.153793	0.0985742	0.544808	0.199311	0.406841	0.0901096
7	0.195176	0.141061	0.614182	0.21919	0.346842	0.121916
8	0.21022	0.102534	0.503664	0.110374	0.304207	0.149856
9	0.312997	0.178562	0.555177	0.208231	0.502328	0.232535
10	0.414816	0.271881	0.502714	0.29627	0.714285	0.323222
11	0.502681	0.374764	0.506371	0.31002	0.919017	0.561323
12	0.606873	0.480414	0.722464	0.540751	1	0.887089
13	0.822988	0.631685	0.917839	0.851709	0.762228	1
14	0.95121	0.832227	1	1	0.67174	0.993721
15	1	1	0.915988	0.86694	0.475797	0.612207
16	0.791192	0.874041	0.512755	0.515198	0.304065	0.327446
17	0.540291	0.646232	0.380086	0.308141	0.217212	0.214386
18	0.37419	0.393668	0.269237	0.164632	0.168433	0.103502
