# Supplementary material for: The VINE complex is an endosomal VPS9-domain GEF and SNX-BAR coat
Source: eLife. 2022 Aug 8;11:e77035. doi: 10.7554/eLife.77035 (PMC9507130; doi:10.7554/eLife.77035)
Supplement: Figure 7—source data 2. [file elife-77035-fig7-data2.xlsx]

## Sheet: Figure 7D
	Normalized to % of vrl1 for each cargo
	Rep1	Rep2	Rep3	Average	SEM
MRL1-GFP vrl1	100	100	100	100	0
MRL1-GFP pVRL1	60.4454	41.5478	58.1676	53.3869	5.95596
VPS10-GFP vrl1	100	100	100	100	0
VPS10-GFP pVRL1	97.5393	102.942	105.373	101.951	2.31502
ATG27-GFP vrl1	100	100	100	100	0
ATG27-GFP pVRL1	100.147	92.7713	99.3899	97.4361	2.34258
