# Supplementary material for: The VINE complex is an endosomal VPS9-domain GEF and SNX-BAR coat
Source: eLife. 2022 Aug 8;11:e77035. doi: 10.7554/eLife.77035 (PMC9507130; doi:10.7554/eLife.77035)
Supplement: Figure 7—source data 3. [file elife-77035-fig7-data3.xlsx]

## Sheet: Figure 7F
	Rep1	Rep2	Rep3	Mean	SEM
MRL1-mScI vrl1	0.166054	0.222801	0.115876	0.168244	0.0308861
MRL1-mScI pVRL1	0.0432434	0.0695894	0.0752741	0.0627023	0.00986688
MRL1-mScI pVRL1(D373A)	0.0345202	0.0804438	0.0345764	0.0498468	0.0152985
