# Supplementary material for: The VINE complex is an endosomal VPS9-domain GEF and SNX-BAR coat
Source: eLife. 2022 Aug 8;11:e77035. doi: 10.7554/eLife.77035 (PMC9507130; doi:10.7554/eLife.77035)
Supplement: Figure 7—source data 4. [file elife-77035-fig7-data4.xlsx]

## Sheet: Figure 7I
	% cells with clear GFP puncta
Vps10-Envy Constructs	Rep1	Rep2	Rep3	Mean	SEM
pVPS10-Envy vrl1 (pEmpty)	100	100	100	100	0
pVPS10-Envy pVRL1	100	99.5717	99.6564	99.7427	0.130953
pVPS10(delCt)-Envy vrl1 (pEmpty)	8.8947	7.2241	11.8246	9.31447	1.34453
pVPS10(delCt)-Envy pVRL1	3.5203	3.2496	6.6894	4.48643	1.10425
pVPS10(delCt)-MRL1^Ct-Envy vrl1 (pEmpty)	46.8121	35.167	42.5781	41.5191	3.4031
pVPS10(delCt)-MRL1^Ct-Envy pVRL1	27.2757	27.7502	27.3581	27.4613	0.146379
