# Supplementary material for: The VINE complex is an endosomal VPS9-domain GEF and SNX-BAR coat
Source: eLife. 2022 Aug 8;11:e77035. doi: 10.7554/eLife.77035 (PMC9507130; doi:10.7554/eLife.77035)
Supplement: Figure 7—source data 5. [file elife-77035-fig7-data5.xlsx]

## Sheet: Figure 7K
	Rep1	Rep2	Rep3	Mean	SEM
MRL1-mScI vrl1 (pEmpty)	0.263731	0.225945	0.168994	0.219557	0.0275343
MRL1-mScI pVRL1	0.128868	0.102362	0.0891738	0.106801	0.0116716
MRL1-mScI snx4 KO vrl1 (pEmpty)	0.0421681	0.0661393	0.0508778	0.0530617	0.00700551
MRL1-mScI snx4 KO pVRL1	0.00969367	0.0162559	0.0188327	0.0149274	0.00272054
