# Supplementary material for: The VINE complex is an endosomal VPS9-domain GEF and SNX-BAR coat
Source: eLife. 2022 Aug 8;11:e77035. doi: 10.7554/eLife.77035 (PMC9507130; doi:10.7554/eLife.77035)
Supplement: Supplementary file 1. — List of Z-scores from the Vrl1 DHFR screen. [file elife-77035-supp1.xlsx]

## Sheet: Vrl1 DHFR Interactors
List of Z-Scores from the Vrl1 DHFR Screen
ORF	Name	Vrl1 DHFR Z-score	SGD Brief Description	Huh et al., 2003 Localization (PMID:14562095)
YOR089C	VPS21	18.6761	Endosomal Rab family GTPase	cytoplasm,nucleus
YMR231W	PEP5	16.9048	Histone E3 ligase, component of CORVET membrane tethering complex	endosome
YJL154C	VPS35	13.0252	Endosomal subunit of membrane-associated retromer complex	vacuolar membrane,endosome
YBL017C	PEP1	12.9174	Type I transmembrane sorting receptor for multiple vacuolar hydrolases	punctate composite,endosome
YLR148W	PEP3	12.2459	Component of CORVET membrane tethering complex	endosome
YBR127C	VMA2	12.2397	Subunit B of V1 peripheral membrane domain of vacuolar H+-ATPase	vacuolar membrane
YKR078W	YKR078W	9.47771	Cytoplasmic protein of unknown function	cytoplasm
YPR079W	MRL1	7.6543	Membrane protein	endosome
YKR014C	YPT52	7.59012	Endosomal Rab family GTPase	cytoplasm,nucleus
YIL041W	GVP36	7.17429	BAR domain protein that localizes to early and late Golgi vesicles	cytoplasm
YGL023C	PIB2	7.07519	PhosphatidylInositol(3)-phosphate binding protein	vacuolar membrane
YER166W	DNF1	6.89421	Aminophospholipid translocase (flippase)	Golgi to vacuole
YOR042W	CUE5	6.73445	Ubiquitin-binding protein	punctate composite
YEL013W	VAC8	6.69919	Vacuolar membrane protein	vacuolar membrane
YNL238W	KEX2	6.09379	Kexin, a subtilisin-like protease (proprotein convertase)	punctate composite,Golgi to ER
YBR207W	FTH1	5.668	Putative high affinity iron transporter	vacuolar membrane
YDR495C	VPS3	5.64015	Component of CORVET membrane tethering complex	punctate composite
YDR229W	IVY1	5.0776	Phospholipid-binding protein that interacts with both Ypt7p and Vps33p	vacuolar membrane
YLR332W	MID2	4.92914	O-glycosylated plasma membrane protein	cell periphery
YDR323C	PEP7	4.68866	Adaptor protein involved in vesicle-mediated vacuolar protein sorting	endosome
YDR456W	NHX1	4.49982	Na+/H+ and K+/H+ exchanger	endosome
YKR088C	TVP38	4.40116	Integral membrane protein	punctate composite,endosome,Golgi to ER,Golgi to vacuole
YGL095C	VPS45	4.11876	Protein of the Sec1p/Munc-18 family	Golgi to ER,Golgi to vacuole
YNL231C	PDR16	4.07504	Phosphatidylinositol transfer protein (PITP)	lipid particle
YDR497C	ITR1	4.03903	Myo-inositol transporter	cell periphery,vacuole
YOR132W	VPS17	4.01974	Subunit of the membrane-associated retromer complex	endosome
YKR035W-A	DID2	3.76551	Class E protein of the vacuolar protein-sorting (Vps) pathway	endosome
YMR186W	HSC82	3.71411	Cytoplasmic chaperone of the Hsp90 family	cytoplasm
YKR007W	MEH1	3.68637	Subunit of the EGO/GSE complex	vacuolar membrane
YNL283C	WSC2	3.60249	Sensor-transducer of the stress-activated PKC1-MPK1 signaling pathway	cell periphery
YML087C	AIM33	3.50209	Protein of unknown function, highly conserved across species	N/A
YJL151C	SNA3	3.25938	Protein involved in efficient MVB sorting of proteins to the vacuole	vacuole
YBL029C-A	YBL029C-A	3.2485	Protein of unknown function	cell periphery
YPR036W-A	SPO24	3.2173	Small (67 amino acids) protein involved in sporulation	N/A
YDR100W	TVP15	3.15269	Integral membrane protein	Golgi to ER
YHR012W	VPS29	3.13805	Subunit of the membrane-associated retromer complex	ambiguous
YLR257W	YLR257W	3.11247	Protein of unknown function	cytoplasm
YGL137W	SEC27	3.10852	Essential beta'-coat protein of the COPI coatomer	Golgi,Golgi to ER
YPL045W	VPS16	3.04106	Subunit of the HOPS and the CORVET complexes	vacuolar membrane
YOR298C-A	MBF1	2.99824	Transcriptional coactivator	cytoplasm
YOL129W	VPS68	2.8257	Vacuolar membrane protein of unknown function	vacuolar membrane
YBR077C	SLM4	2.76982	Subunit of the EGO/GSE complex	vacuolar membrane
YGR094W	VAS1	2.73944	Mitochondrial and cytoplasmic valyl-tRNA synthetase	cytoplasm
YLL048C	YBT1	2.73076	Transporter of the ATP-binding cassette (ABC) family	vacuolar membrane
YHR183W	GND1	2.6901	6-phosphogluconate dehydrogenase (decarboxylating)	ambiguous,cytoplasm
YAL002W	VPS8	2.61278	Membrane-binding component of the CORVET complex	endosome
YNL277W	MET2	2.54871	L-homoserine-O-acetyltransferase	cytoplasm,nucleus
YML121W	GTR1	2.48429	Subunit of a TORC1-stimulating GTPase and the EGO/GSE complex	vacuolar membrane
YEL051W	VMA8	2.47767	Subunit D of the V1 peripheral membrane domain of V-ATPase	vacuolar membrane
YML018C	YML018C	2.47717	Protein of unknown function	vacuolar membrane
YDL225W	SHS1	2.43685	Component of the septin ring that is required for cytokinesis	bud neck,cell periphery
YPL240C	HSP82	2.42062	Hsp90 chaperone	cytoplasm
YLR240W	VPS34	2.33281	Phosphatidylinositol (PI) 3-kinase that synthesizes PI-3-phosphate	endosome
YML037C	YML037C	2.31612	Putative protein of unknown function	Golgi to vacuole
YMR071C	TVP18	2.28223	Integral membrane protein	Golgi to vacuole
YDR135C	YCF1	2.28204	Vacuolar glutathione S-conjugate transporter	vacuolar membrane
YBR143C	SUP45	2.27246	Polypeptide release factor (eRF1) in translation termination	cytoplasm
YPL120W	VPS30	2.23332	Subunit of phosphatidylinositol (PtdIns) 3-kinase complexes I and II	vacuole
YGR123C	PPT1	2.20973	Protein serine/threonine phosphatase	cytoplasm
YEL046C	GLY1	2.20422	Threonine aldolase	cytoplasm,nucleus
YMR095C	SNO1	2.1732	Protein of unconfirmed function	cytoplasm
YML131W	YML131W	2.15414	Protein of unknown function	cytoplasm
YLR413W	INA1	2.13903	Protein of unknown function	cell periphery
YJR125C	ENT3	2.12753	Protein containing an N-terminal epsin-like domain	N/A
YGL077C	HNM1	2.0974	Plasma membrane transporter for choline, ethanolamine, and carnitine	cell periphery,bud
YCR075W-A	EGO2	2.08812	Subunit of the EGO/GSE complex	N/A
YDR099W	BMH2	2.06078	14-3-3 protein, minor isoform	cytoplasm,nucleus
YCR004C	YCP4	2.05201	Protein of unknown function	cytoplasm,punctate composite
YMR235C	RNA1	2.02665	GTPase activating protein (GAP) for Gsp1p	cytoplasm
YDR016C	DAD1	1.9673	Essential subunit of the Dam1 complex (aka DASH complex)	spindle pole
YMR013C	SEC59	1.96415	Dolichol kinase	N/A
YLL024C	SSA2	1.94261	HSP70 family ATP-binding protein	cytoplasm,nucleus
YNL044W	YIP3	1.92482	Protein localized to COPII vesicles	Golgi,Golgi to ER
YAL026C	DRS2	1.90751	Trans-golgi network aminophospholipid translocase (flippase)	Golgi to ER,Golgi to vacuole
YDR038C	ENA5	1.88967	Protein with similarity to P-type ATPase sodium pumps	cell periphery
YPR167C	MET16	1.88862	3'-phosphoadenylsulfate reductase	N/A
YGR163W	GTR2	1.863	Subunit of a TORC1-stimulating GTPase and the EGO/GSE complex	vacuolar membrane
YBR296C	PHO89	1.8629	Plasma membrane Na+/Pi cotransporter	ER
YNL209W	SSB2	1.86019	Cytoplasmic ATPase that is a ribosome-associated molecular chaperone	cytoplasm
YEL005C	VAB2	1.8561	Subunit of the BLOC-1 complex involved in endosomal maturation	punctate composite
YML057W	CMP2	1.82014	Calcineurin A	cytoplasm
YMR319C	FET4	1.79934	Low-affinity Fe(II) transporter of the plasma membrane	cell periphery,vacuole
YGL006W	PMC1	1.77911	Vacuolar Ca2+ ATPase involved in depleting cytosol of Ca2+ ions	vacuolar membrane
YEL012W	UBC8	1.74828	Ubiquitin-conjugating enzyme that regulates gluconeogenesis	cytoplasm,nucleus
YBR025C	OLA1	1.74274	P-loop ATPase with similarity to human OLA1 and bacterial YchF	cytoplasm
YPR108W	RPN7	1.74266	Essential non-ATPase regulatory subunit of the 26S proteasome	nucleus
YLR027C	AAT2	1.74116	Cytosolic aspartate aminotransferase involved in nitrogen metabolism	N/A
YPR051W	MAK3	1.7108	Catalytic subunit of the NatC type N-terminal acetyltransferase (NAT)	cytoplasm,nucleus
YFR053C	HXK1	1.70224	Hexokinase isoenzyme 1	cytoplasm
YMR255W	GFD1	1.68594	Coiled-coiled protein of unknown function	cytoplasm
YDL092W	SRP14	1.68369	Signal recognition particle (SRP) subunit	ER
YPR144C	NOC4	1.62778	Nucleolar protein	nucleus
YNL265C	IST1	1.62137	Protein with positive role in the multivesicular body sorting pathway	endosome
YER072W	VTC1	1.59981	Regulatory subunit of the vacuolar transporter chaperone (VTC) complex	ER
YMR173W	DDR48	1.58009	DNA damage-responsive protein	cytoplasm
YDL113C	ATG20	1.57863	Sorting nexin family member	endosome
YMR077C	VPS20	1.55718	Myristoylated subunit of the ESCRT-III complex	vacuolar membrane,endosome
YHL010C	ETP1	1.54875	Protein of unknown function required for growth on ethanol	N/A
YNL330C	RPD3	1.5465	Histone deacetylase, component of both the Rpd3S and Rpd3L complexes	cytoplasm,nucleus
YGL054C	ERV14	1.53124	COPII-coated vesicle protein	ER,vacuole
YLR016C	PML1	1.53025	Subunit of the RES complex	cytoplasm,nucleus
YGL203C	KEX1	1.52081	Cell death protease essential for hypochlorite-induced apoptosis	punctate composite
YIL084C	SDS3	1.51573	Component of the Rpd3L histone deacetylase complex	nucleus
YPL221W	FLC1	1.51317	Flavin adenine dinucleotide transporter	bud neck,cell periphery,vacuole
YDR105C	TMS1	1.50685	Vacuolar membrane protein of unknown function	vacuolar membrane
YLR438W	CAR2	1.49661	L-ornithine transaminase (OTAse)	cytoplasm,nucleus
YKL002W	DID4	1.4769	Class E Vps protein of the ESCRT-III complex	endosome
YJL053W	PEP8	1.47227	Vacuolar protein component of the retromer	endosome
YLR020C	YEH2	1.46355	Steryl ester hydrolase	ambiguous
YOR007C	SGT2	1.46006	Glutamine-rich cytoplasmic cochaperone	cytoplasm
YIR034C	LYS1	1.44508	Saccharopine dehydrogenase (NAD+, L-lysine-forming)	cytoplasm,nucleus
YAR042W	SWH1	1.43568	Protein similar to mammalian oxysterol-binding protein	N/A
YEL047C	FRD1	1.39885	Soluble fumarate reductase	cytoplasm,nucleus
YKR059W	TIF1	1.39503	Translation initiation factor eIF4A	cytoplasm
YGR124W	ASN2	1.39269	Asparagine synthetase	cytoplasm
YMR030W-A	YMR030W-A	1.39212	Putative protein of unknown function	N/A
YJL060W	BNA3	1.39042	Kynurenine aminotransferase	cytoplasm,mitochondrion
YMR039C	SUB1	1.38943	Transcriptional regulator	nucleus
YER048W-A	ISD11	1.3877	Cysteine desulfurase (Nfs1p) activator	mitochondrion
YMR226C	YMR226C	1.38254	NADP(+)-dependent serine dehydrogenase and carbonyl reductase	cytoplasm,nucleus
YDR080W	VPS41	1.37763	Subunit of the HOPS endocytic tethering complex	vacuole,vacuolar membrane
YML030W	RCF1	1.37715	Cytochrome c oxidase subunit	mitochondrion
YLR326W	YLR326W	1.37702	Putative protein of unknown function	ambiguous
YIL116W	HIS5	1.3741	Histidinol-phosphate aminotransferase	cytoplasm
YBR083W	TEC1	1.36949	Transcription factor targeting filamentation genes and Ty1 expression	cytoplasm,nucleus
YGR294W	PAU12	1.35408	Protein of unknown function	N/A
YKL092C	BUD2	1.34906	GTPase activating factor for Rsr1p/Bud1p	bud neck,cytoplasm,cell periphery
YGL113W	SLD3	1.34202	Protein involved in the initiation of DNA replication	cytoplasm,nucleus
YLR110C	CCW12	1.33983	Cell wall mannoprotein	ER
YMR161W	HLJ1	1.33277	Co-chaperone for Hsp40p	ER
YOL088C	MPD2	1.33263	Member of the protein disulfide isomerase (PDI) family	vacuole
YLR154C-H	YLR154C-H	1.33058	Putative protein of unknown function	N/A
YML042W	CAT2	1.32288	Carnitine acetyl-CoA transferase	N/A
YBL004W	UTP20	1.32148	Component of the small-subunit (SSU) processome	cytoplasm,nucleolus
YGR185C	TYS1	1.30381	Cytoplasmic tyrosyl-tRNA synthetase	cytoplasm
YOR370C	MRS6	1.30117	Rab escort protein	cytoplasm,nucleus
YNL289W	PCL1	1.29952	Cyclin, interacts with cyclin-dependent kinase Pho85p	N/A
YOR198C	BFR1	1.29945	Component of mRNP complexes associated with polyribosomes	ER
YOR069W	VPS5	1.28727	Nexin-1 homolog	endosome
YPL147W	PXA1	1.28233	Subunit of heterodimeric peroxisomal ABC transport complex, with Pxa2p	N/A
YKR092C	SRP40	1.2773	Nucleolar serine-rich protein	nucleolus
YML016C	PPZ1	1.26769	Serine/threonine protein phosphatase Z, isoform of Ppz2p	cytoplasm,cell periphery
YOR140W	SFL1	1.26669	Transcriptional repressor and activator	nucleus
YDR477W	SNF1	1.26646	AMP-activated S/T protein kinase	cytoplasm
YNL293W	MSB3	1.25987	Rab GTPase-activating protein	ambiguous
YOR264W	DSE3	1.25922	Daughter cell-specific protein, may help establish daughter fate	bud neck
YKL041W	VPS24	1.25845	One of four subunits of the ESCRT-III complex	punctate composite,endosome
YJR104C	SOD1	1.25652	Cytosolic copper-zinc superoxide dismutase	ambiguous,cytoplasm,nucleus
YOR027W	STI1	1.25232	Evolutionarily-conserved Hsp90 cochaperone	cytoplasm
YER090W	TRP2	1.24608	Anthranilate synthase	cytoplasm
YPL227C	ALG5	1.23861	UDP-glucose:dolichyl-phosphate glucosyltransferase	ER
YLL040C	VPS13	1.21628	Protein involved in prospore membrane morphogenesis	cytoplasm,endosome
YHR149C	SKG6	1.21187	Integral membrane protein	bud neck,cytoplasm,cell periphery,bud
YDR040C	ENA1	1.20551	P-type ATPase sodium pump	cell periphery
YLR284C	ECI1	1.20005	Peroxisomal delta3,delta2-enoyl-CoA isomerase	N/A
YGL241W	KAP114	1.1995	Karyopherin, responsible for nuclear import of specific proteins	cytoplasm,nucleus
YGR093W	DRN1	1.19803	Splicing factor that modulates turnover of branched RNAs by Dbr1p	nucleus
YJR105W	ADO1	1.19493	Adenosine kinase	cytoplasm,nucleus
YLR353W	BUD8	1.19089	Protein involved in bud-site selection	ambiguous,bud neck,cell periphery,bud
YIR037W	HYR1	1.18514	Thiol peroxidase	cytoplasm
YPR129W	SCD6	1.1819	Repressor of translation initiation	cytoplasm
YBR011C	IPP1	1.17845	Cytoplasmic inorganic pyrophosphatase (PPase)	cytoplasm,nucleus
YLL058W	YLL058W	1.1704	Putative protein of unknown function with similarity to Str2p	N/A
YCR060W	TAH1	1.16094	Component of conserved R2TP complex (Rvb1-Rvb2-Tah1-Pih1)	cytoplasm,nucleus
YJR033C	RAV1	1.15976	Subunit of RAVE complex (Rav1p, Rav2p, Skp1p)	ambiguous
YDL030W	PRP9	1.15389	Subunit of the SF3a splicing factor complex	nucleus
YEL031W	SPF1	1.15058	P-type ATPase, ion transporter of the ER membrane	ER
YML082W	YML082W	1.14943	Putative protein predicted to have carbon-sulfur lyase activity	cytoplasm,nucleus
YGL202W	ARO8	1.14497	Aromatic aminotransferase I	cytoplasm
YBR041W	FAT1	1.13661	Very long chain fatty acyl-CoA synthetase and fatty acid transporter	lipid particle
YBR239C	ERT1	1.13466	Transcriptional regulator	cytoplasm,nucleus
YHR077C	NMD2	1.13324	Protein involved in the nonsense-mediated mRNA decay (NMD) pathway	cytoplasm
YGR169C-A	LSO2	1.13272	Ribosome-associated protein	N/A
YLR250W	SSP120	1.1312	Protein packaged into COPII vesicles for trafficking between ER and Go	punctate composite,Golgi,Golgi to ER
YGL153W	PEX14	1.12216	Central component of the peroxisomal importomer complex	peroxisome
YIL103W	DPH1	1.11828	Protein required for synthesis of diphthamide	cytoplasm
YMR153W	NUP53	1.11564	FG-nucleoporin component of central core of nuclear pore complex (NPC)	nuclear periphery
YGR274C	TAF1	1.10879	TFIID subunit, involved in RNA pol II transcription initiation	nucleus
YKL166C	TPK3	1.1074	cAMP-dependent protein kinase catalytic subunit	cytoplasm,nucleus
YBR262C	MIC12	1.10234	Component of the MICOS complex	mitochondrion
YCR012W	PGK1	1.10054	3-phosphoglycerate kinase	cytoplasm,nucleus
YJL109C	UTP10	1.09343	Nucleolar protein	nucleolus
YGL162W	SUT1	1.09061	Zn(II)2Cys6 family transcription factor	cytoplasm,nucleus
YBR294W	SUL1	1.08053	High affinity sulfate permease of the SulP anion transporter family	N/A
YBL047C	EDE1	1.08018	Scaffold protein involved in the formation of early endocytic sites	punctate composite
YNL049C	SFB2	1.07806	Component of the Sec23p-Sfb2p heterodimer of the COPII vesicle coat	ER to Golgi
YAR071W	PHO11	1.06616	One of three repressible acid phosphatases	vacuole
YBR169C	SSE2	1.06425	Member of Hsp110 subclass of the heat shock protein 70 (HSP70) family	cytoplasm
YDL199C	YDL199C	1.06363	Putative transporter	N/A
YHR199C-A	NBL1	1.0615	Subunit of the conserved chromosomal passenger complex (CPC)	N/A
YDR202C	RAV2	1.05638	Subunit of RAVE complex (Rav1p, Rav2p, Skp1p)	ambiguous
YKR103W	NFT1	1.05149	Putative transporter of the MRP subfamily	cytoplasm,nucleus
YCR027C	RHB1	1.05089	Putative Rheb-related GTPase	cytoplasm
YGR008C	STF2	1.04984	Protein involved in resistance to desiccation stress	cytoplasm,nucleus
YBL085W	BOI1	1.04961	Protein involved in polar growth, functionally redundant with Boi2p	bud neck,cytoplasm,cell periphery,bud
YJR063W	RPA12	1.04869	RNA polymerase I subunit A12.2	nucleolus
YMR284W	YKU70	1.04691	Subunit of the telomeric Ku complex (Yku70p-Yku80p)	cytoplasm,nucleus
YGL009C	LEU1	1.04663	Isopropylmalate isomerase	cytoplasm,nucleus
YIL138C	TPM2	1.0434	Minor isoform of tropomyosin	cytoplasm
YOR332W	VMA4	1.04247	Subunit E of the V1 domain of the vacuolar H+-ATPase (V-ATPase)	vacuolar membrane
YGR283C	YGR283C	1.04239	Putative methyltransferase	nucleolus
YOL093W	TRM10	1.03743	tRNA methyltransferase	cytoplasm,nucleus
YNR069C	BSC5	1.03335	Protein of unknown function	N/A
YMR300C	ADE4	1.03225	Phosphoribosylpyrophosphate amidotransferase (PRPPAT)	cytoplasm
YML007C-A	MIN4	1.02949	Mitochondrial protein of unknown function	mitochondrion
YGR019W	UGA1	1.02861	Gamma-aminobutyrate (GABA) transaminase	cytoplasm
YNR026C	SEC12	1.02761	Guanine nucleotide exchange factor (GEF)	ER
YFR024C-A	LSB3	1.02283	Protein containing a C-terminal SH3 domain	bud neck,cytoplasm,mitochondrion,cell periphery
YMR109W	MYO5	1.02197	One of two type I myosin motors	actin
YOR107W	RGS2	1.01439	Negative regulator of glucose-induced cAMP signaling	cytoplasm,nucleus
YML133C	YML133C	1.00226	Putative Y' element ATP-dependent helicase	N/A
YBR024W	SCO2	0.99812	Protein anchored to mitochondrial inner membrane	N/A
YNR035C	ARC35	0.997578	Subunit of the ARP2/3 complex	actin
YDR342C	HXT7	0.994001	High-affinity glucose transporter	N/A
YML107C	YML107C	0.993493	Protein required for nuclear retention of unspliced pre-mRNAs	nuclear periphery
YGL251C	HFM1	0.987886	Meiosis specific DNA helicase	N/A
YNL325C	FIG4	0.986948	Phosphatidylinositol 3,5-bisphosphate (PtdIns[3,5]P) phosphatase	ambiguous
YBR225W	YBR225W	0.986458	Putative protein of unknown function	ambiguous
YPL032C	SVL3	0.980659	Protein of unknown function	ambiguous,bud neck,cytoplasm,cell periphery,bud
YOR184W	SER1	0.979852	3-phosphoserine aminotransferase	cytoplasm
YGR063C	SPT4	0.976601	Spt4p/5p (DSIF) transcription elongation factor complex subunit	nucleus
YEL029C	BUD16	0.976589	Putative pyridoxal kinase	cytoplasm,nucleus
YGL171W	ROK1	0.975682	RNA-dependent ATPase	N/A
YAL055W	PEX22	0.975112	Putative peroxisomal membrane protein	punctate composite
YLR432W	IMD3	0.973741	Inosine monophosphate dehydrogenase	cytoplasm
YGL263W	COS12	0.97091	Endosomal protein involved in turnover of plasma membrane proteins	N/A
YMR274C	RCE1	0.969652	Type II CAAX prenyl protease	N/A
YMR189W	GCV2	0.969398	P subunit of the mitochondrial glycine decarboxylase complex	mitochondrion
YBL049W	MOH1	0.968719	Protein of unknown function, essential for stationary phase survival	N/A
YNL334C	SNO2	0.965984	Protein of unknown function	N/A
YLR436C	ECM30	0.963671	Protein of unknown function	cytoplasm
YGR155W	CYS4	0.957391	Cystathionine beta-synthase	cytoplasm
YDL147W	RPN5	0.956933	Subunit of the CSN and 26S proteasome lid complexes	nucleus
YLR401C	DUS3	0.956243	Dihydrouridine synthase	cytoplasm,nucleus
YNR057C	BIO4	0.954638	Dethiobiotin synthetase	N/A
YDR226W	ADK1	0.953989	Adenylate kinase, required for purine metabolism	cytoplasm,nucleus
YJL056C	ZAP1	0.950718	Zinc-regulated transcription factor	cytoplasm,nucleus
YLR394W	CST9	0.948016	SUMO E3 ligase	N/A
YML002W	YML002W	0.947958	Putative protein of unknown function	N/A
YBR058C	UBP14	0.947917	Ubiquitin-specific protease	cytoplasm,nucleus
YOR074C	CDC21	0.944344	Thymidylate synthase	cytoplasm,nucleus
YLR273C	PIG1	0.944084	Putative targeting subunit for type-1 protein phosphatase Glc7p	N/A
YKR011C	YKR011C	0.944062	Protein of unknown function	nucleus
YOL165C	AAD15	0.942117	Putative aryl-alcohol dehydrogenase	N/A
YDR293C	SSD1	0.937849	Translational repressor with a role in polar growth and wall integrity	cytoplasm
YMR270C	RRN9	0.936956	Protein involved in promoting high level transcription of rDNA	nucleolus
YOL065C	INP54	0.935348	Phosphatidylinositol 4,5-bisphosphate 5-phosphatase	N/A
YHR102W	KIC1	0.930237	Protein kinase of the PAK/Ste20 family, required for cell integrity	cytoplasm
YGL253W	HXK2	0.929347	Hexokinase isoenzyme 2	cytoplasm
YPL214C	THI6	0.924657	Thiamine-phosphate diphosphorylase and hydroxyethylthiazole kinase	cytoplasm,punctate composite
YPR048W	TAH18	0.924104	Conserved NAPDH-dependent diflavin reductase	N/A
YFL014W	HSP12	0.91792	Plasma membrane protein involved in maintaining membrane organization	cytoplasm,nucleus
YNL045W	YNL045W	0.917545	Leucyl aminopeptidase yscIV with epoxide hydrolase activity	cytoplasm,nucleus
YPL281C	ERR2	0.917036	Enolase, a phosphopyruvate hydratase	N/A
YJL183W	MNN11	0.909748	Subunit of a Golgi mannosyltransferase complex	Golgi
YDR471W	RPL27B	0.908648	Ribosomal 60S subunit protein L27B	cytoplasm
YDL156W	YDL156W	0.906347	Nuclear protein with role in transcription, protein quality control	cytoplasm,nucleus
YMR322C	SNO4	0.903779	Possible chaperone and cysteine protease	N/A
YHL007C	STE20	0.900264	Cdc42p-activated signal transducing kinase	cytoplasm,bud
YGR202C	PCT1	0.896919	Cholinephosphate cytidylyltransferase	nuclear periphery
YBR196C-B	YBR196C-B	0.896759	Putative protein of unknown function	N/A
YKL126W	YPK1	0.894811	S/T protein kinase	cytoplasm
YER110C	KAP123	0.89467	Karyopherin beta	cytoplasm,nucleus
YNL085W	MKT1	0.893222	Protein similar to nucleases that forms a complex with Pbp1p	cytoplasm,punctate composite
YNL287W	SEC21	0.891325	Gamma subunit of coatomer	Golgi,Golgi to ER
YBR066C	NRG2	0.890512	Transcriptional repressor	cytoplasm,nucleus
YNR028W	CPR8	0.889791	Peptidyl-prolyl cis-trans isomerase (cyclophilin)	vacuole
YBR005W	YBR005W	0.889767	Plasma membrane (PM) ubiquitin ligase-substrate adaptor	ambiguous
YDR473C	PRP3	0.889763	Splicing factor	nucleus
YHR112C	YHR112C	0.885416	Protein of unknown function	cytoplasm
YKL065C	YET1	0.881551	Endoplasmic reticulum transmembrane protein	ER
YGR170W	PSD2	0.876659	Phosphatidylserine decarboxylase of the Golgi and vacuolar membranes	N/A
YBR280C	YBR280C	0.876522	F-Box protein involved in proteasome-dependent degradation of Aah1p	N/A
YNL294C	RIM21	0.87262	pH sensor molecule, component of the RIM101 pathway	N/A
YPR029C	APL4	0.871832	Gamma-adaptin	punctate composite
YDR533C	HSP31	0.871576	Methylglyoxalase that converts methylglyoxal to D-lactate	cytoplasm,nucleus
YNL015W	PBI2	0.86856	Cytosolic inhibitor of vacuolar proteinase B (PRB1)	cytoplasm,nucleus
YHL031C	GOS1	0.867175	v-SNARE protein involved in Golgi transport	N/A
YIL135C	VHS2	0.865853	Regulator of septin dynamics	cytoplasm
YJL025W	RRN7	0.86207	Component of the core factor (CF) rDNA transcription factor complex	nucleolus
YNL124W	NAF1	0.857259	RNA-binding protein required for the assembly of box H/ACA snoRNPs	nucleus
YJL198W	PHO90	0.855857	Low-affinity phosphate transporter	ER
YGL105W	ARC1	0.855211	Protein that binds tRNA and methionyl- and glutamyl-tRNA synthetases	cytoplasm
YER019C-A	SBH2	0.853295	Ssh1p-Sss1p-Sbh2p complex component	ER
YPR066W	UBA3	0.851736	Protein that activates Rub1p (NEDD8) before neddylation	cytoplasm,punctate composite
YIL011W	TIR3	0.850745	Cell wall mannoprotein	N/A
YCR096C	HMRA2	0.848991	Silenced copy of a2 at HMR	N/A
YDR103W	STE5	0.848638	Pheromone-responsive MAPK scaffold protein	cytoplasm,nucleus
YMR079W	SEC14	0.848614	Phosphatidylinositol/phosphatidylcholine transfer protein	cytoplasm,nucleus
YKL212W	SAC1	0.847112	Phosphatidylinositol phosphate phosphatase	ER,vacuole
YBR121C	GRS1	0.846001	Cytoplasmic and mitochondrial glycyl-tRNA synthase	cytoplasm
YKL220C	FRE2	0.84067	Ferric reductase and cupric reductase	N/A
YDL125C	HNT1	0.838658	Adenosine 5'-monophosphoramidase	cytoplasm,nucleus
YKL198C	PTK1	0.83849	Putative serine/threonine protein kinase	N/A
YGR088W	CTT1	0.834463	Cytosolic catalase T	cytoplasm
YBR020W	GAL1	0.834197	Galactokinase	N/A
YGR121C	MEP1	0.833913	Ammonium permease	cell periphery
YIL048W	NEO1	0.832394	Phospholipid translocase (flippase), role in phospholipid asymmetry o	Golgi to ER
YDR056C	YDR056C	0.831257	Putative protein of unknown function	ER
YGR285C	ZUO1	0.831049	Ribosome-associated chaperone	cytoplasm
YEL064C	AVT2	0.830958	Putative transporter	N/A
YNL272C	SEC2	0.83038	Guanyl-nucleotide exchange factor for the small G-protein Sec4p	ambiguous,bud neck,cytoplasm,bud
YFR041C	ERJ5	0.830066	Type I membrane protein with a J domain	ER
YFL066C	YFL066C	0.828117	Helicase-like protein encoded within the telomeric Y' element	N/A
YDL244W	THI13	0.824793	Protein involved in synthesis of the thiamine precursor HMP	N/A
YLR396C	VPS33	0.824321	ATP-binding protein that is a subunit of the HOPS and CORVET complexes	vacuolar membrane
YLR181C	VTA1	0.82306	Multivesicular body (MVB) protein	endosome
YLR437C	YLR437C	0.822084	Protein that regulates nuclear localization of Rnr2p and Rnr4p	N/A
YJR056C	YJR056C	0.821532	Protein of unknown function	cytoplasm,nucleus
YBR257W	POP4	0.817752	Subunit of both RNase MRP and nuclear RNase P	N/A
YPL258C	THI21	0.81754	Hydroxymethylpyrimidine (HMP) and HMP-phosphate kinase	N/A
YJL068C	YJL068C	0.816809	Esterase that can function as an S-formylglutathione hydrolase	cytoplasm
YKL080W	VMA5	0.81476	Subunit C of the V1 peripheral membrane domain of V-ATPase	ambiguous,vacuolar membrane
YJR041C	URB2	0.812054	Protein required for normal metabolism of the rRNA primary transcript	nucleolus
YLR307W	CDA1	0.799458	Chitin deacetylase	N/A
YLR392C	YLR392C	0.796425	Protein of unknown function that contains 2 PY motifs	cytoplasm
YAL020C	ATS1	0.796301	Protein required for modification of wobble nucleosides in tRNA	N/A
YER093C-A	YER093C-A	0.794213	Protein of unknown function	N/A
YHR193C	EGD2	0.79183	Alpha subunit of the nascent polypeptide-associated complex (NAC)	cytoplasm
YER116C	SLX8	0.789483	Subunit of Slx5-Slx8 SUMO-targeted ubiquitin ligase (STUbL) complex	cytoplasm,nucleus
YJL168C	SET2	0.789404	Histone methyltransferase with a role in transcriptional elongation	nucleus
YOR018W	ROD1	0.78939	Alpha-arrestin involved in ubiquitin-dependent endocytosis	cytoplasm
YLR330W	CHS5	0.788274	Component of the exomer complex	Golgi to vacuole
YDR007W	TRP1	0.78729	Phosphoribosylanthranilate isomerase	cytoplasm,nucleus
YER070W	RNR1	0.787125	Major isoform of large subunit of ribonucleotide-diphosphate reductase	ambiguous
YIL078W	THS1	0.786682	Threonyl-tRNA synthetase	cytoplasm
YOR209C	NPT1	0.786161	Nicotinate phosphoribosyltransferase	cytoplasm,nucleus
YLR363C	NMD4	0.785246	Protein that may be involved in nonsense-mediated mRNA decay	cytoplasm
YDR022C	CIS1	0.783526	Autophagy-specific protein required for autophagosome formation	punctate composite
YJL164C	TPK1	0.780157	cAMP-dependent protein kinase catalytic subunit	cytoplasm,nucleus
YBL032W	HEK2	0.779543	RNA binding protein involved in asymmetric localization of ASH1 mRNA	cytoplasm
YDR089W	YDR089W	0.777755	Novel subunit of the vacuolar transporter chaperone complex	ambiguous
YPR032W	SRO7	0.777097	Effector of Rab GTPase Sec4p	cytoplasm,cell periphery,bud
YBR302C	COS2	0.776645	Endosomal protein involved in turnover of plasma membrane proteins	vacuole
YJL073W	JEM1	0.776025	DnaJ-like chaperone required for nuclear membrane fusion during mating	N/A
YKL056C	YKL056C	0.775309	Protein that associates with ribosomes	cytoplasm
YNL298W	CLA4	0.772017	Cdc42p-activated signal transducing kinase	ambiguous,cytoplasm,cell periphery,bud
YAL060W	BDH1	0.771417	NAD-dependent (R,R)-butanediol dehydrogenase	cytoplasm
YNL138W-A	RCP10	0.770099	Component of the SF3b subcomplex of the U2 snRNP	N/A
YIL056W	YIL056W	0.769153	Transcriptional activator	cytoplasm,nucleus
YHL043W	ECM34	0.766294	Protein of unknown function	N/A
YBR052C	YBR052C	0.766158	Protein of unknown function	punctate composite
YNR023W	SNF12	0.76252	73 kDa subunit of the SWI/SNF chromatin remodeling complex	nucleus
YIL093C	RSM25	0.762465	Mitochondrial ribosomal protein of the small subunit	mitochondrion
YJL157C	FAR1	0.762374	CDK inhibitor and nuclear anchor	nucleus
YIL166C	YIL166C	0.759934	Sulfonate and inorganic sulfur transporter	N/A
YDR083W	RRP8	0.759779	Nucleolar S-adenosylmethionine-dependent rRNA methyltransferase	nucleolus,nucleus
YPR145W	ASN1	0.758782	Asparagine synthetase	cytoplasm
YOL143C	RIB4	0.757682	Lumazine synthase (DMRL synthase)	cytoplasm,nucleus
YER011W	TIR1	0.757218	Cell wall mannoprotein	ER
YOR330C	MIP1	0.755832	Mitochondrial DNA polymerase gamma	mitochondrion
YHR204W	MNL1	0.754255	Alpha-1,2-specific exomannosidase of the endoplasmic reticulum	cytoplasm
YIL173W	VTH1	0.754255	Putative membrane glycoprotein	endosome
YDL243C	AAD4	0.754214	Putative aryl-alcohol dehydrogenase	N/A
YMR027W	YMR027W	0.752912	A metal-dependent phosphatase, part of the DUF89 protein family	cytoplasm,nucleus
YCR072C	YCR072C	0.752463	Ribosomal large subunit (60S) assembly factor	N/A
YIL063C	YRB2	0.7513	Protein of unknown function	nucleus
YBR033W	EDS1	0.749489	Putative zinc cluster protein, predicted to be a transcription factor	N/A
YGL184C	STR3	0.747476	Peroxisomal cystathionine beta-lyase	cytoplasm,nucleus
YOR173W	DCS2	0.747329	m(7)GpppX pyrophosphatase regulator	cytoplasm
YCR061W	YCR061W	0.746597	Protein of unknown function	punctate composite
YHR009C	YHR009C	0.745583	Putative oxidoreductase involved in late endosome to Golgi transport	cytoplasm,nucleus
YHR136C	SPL2	0.745422	Protein with similarity to cyclin-dependent kinase inhibitors	punctate composite
YNL038W	GPI15	0.745293	Protein involved in the synthesis of GlcNAc-PI	N/A
YMR083W	ADH3	0.744965	Mitochondrial alcohol dehydrogenase isozyme III	mitochondrion
YKR030W	GMH1	0.744675	Golgi membrane protein of unknown function	N/A
YDR470C	UGO1	0.743548	Outer membrane component of the mitochondrial fusion machinery	N/A
YCR073W-A	SOL2	0.740212	Protein with a possible role in tRNA export	cytoplasm
YDR152W	GIR2	0.739782	Highly-acidic RWD domain-containing cytoplasmic protein	cytoplasm
YMR215W	GAS3	0.739172	Putative 1,3-beta-glucanosyltransferase	ER,cytoplasm
YNR001C	CIT1	0.738849	Mitochondrial citrate synthase	mitochondrion
YGL087C	MMS2	0.738769	Ubiquitin-conjugating enzyme variant	cytoplasm,nucleus
YKL193C	SDS22	0.733799	Regulatory subunit of the type 1 protein phosphatase (PP1) Glc7p	cytoplasm,nucleus
YPL111W	CAR1	0.733155	Arginase, catabolizes arginine to ornithine and urea	cytoplasm,nucleus
YGL175C	SAE2	0.731237	Endonuclease required for telomere elongation	cytoplasm,nucleus
YKR080W	MTD1	0.730789	NAD-dependent 5,10-methylenetetrahydrafolate dehydrogenase	cytoplasm,nucleus
YBR044C	TCM62	0.730345	Protein involved in assembly of the succinate dehydrogenase complex	N/A
YOR356W	YOR356W	0.730287	Putative ortholog of human ETF-dH	mitochondrion
YLR105C	SEN2	0.729341	Subunit of the tRNA splicing endonuclease	mitochondrion
YKL110C	KTI12	0.727412	Protein that plays a role in modification of tRNA wobble nucleosides	cytoplasm
YDL058W	USO1	0.726422	Essential protein involved in vesicle-mediated ER to Golgi transport	punctate composite
YDR502C	SAM2	0.724293	S-adenosylmethionine synthetase	ambiguous
YIL071C	PCI8	0.724007	Possible shared subunit of Cop9 signalosome (CSN) and eIF3	cytoplasm
YBR140C	IRA1	0.721456	GTPase-activating protein	cytoplasm
YMR280C	CAT8	0.721363	Zinc cluster transcriptional activator	cytoplasm,nucleus
YKL178C	STE3	0.720396	Receptor for a factor pheromone	N/A
YOL080C	REX4	0.719588	Putative RNA exonuclease	nucleolus,nucleus
YGR224W	AZR1	0.718899	Plasma membrane transporter of the major facilitator superfamily	N/A
YLR254C	YLR254C	0.718293	Homolog of nuclear distribution factor NudE	cytoplasm,nucleus
YLL039C	UBI4	0.716021	Ubiquitin	cytoplasm,nucleus
YDR245W	MNN10	0.715875	Subunit of a Golgi mannosyltransferase complex	Golgi
YHR016C	YSC84	0.713893	Actin-binding protein	N/A
YDR169C	STB3	0.713705	Ribosomal RNA processing element (RRPE)-binding protein	cytoplasm
YIL047C	SYG1	0.712748	Plasma membrane protein of unknown function	vacuolar membrane
YOR335C	ALA1	0.712712	Cytoplasmic and mitochondrial alanyl-tRNA synthetase	cytoplasm
YOR172W	YRM1	0.711833	Zinc finger transcription factor involved in multidrug resistance	cytoplasm,nucleus
YLR433C	CNA1	0.711463	Calcineurin A	ambiguous
YJL011C	RPC17	0.710623	RNA polymerase III subunit C17	nucleus
YML067C	ERV41	0.709964	Protein localized to COPII-coated vesicles	ER
YFL060C	SNO3	0.708329	Protein of unknown function	N/A
YOR334W	MRS2	0.703913	Mitochondrial inner membrane Mg(2+) channel	mitochondrion
YDR098C	GRX3	0.702964	Glutathione-dependent oxidoreductase	cytoplasm,nucleus
YLR419W	YLR419W	0.702299	Putative helicase with limited sequence similarity to human Rb protein	cytoplasm
YDL087C	LUC7	0.701991	Essential protein associated with the U1 snRNP complex	nucleus
YKR095W-A	PCC1	0.701586	Component of the EKC/KEOPS protein complex	N/A
YDR121W	DPB4	0.697156	Subunit of DNA pol epsilon and of ISW2 chromatin accessibility complex	cytoplasm,nucleus
YDR408C	ADE8	0.696833	Phosphoribosyl-glycinamide transformylase	cytoplasm,nucleus
YMR308C	PSE1	0.695178	Karyopherin/importin that interacts with the nuclear pore complex	cytoplasm,nucleus
YLR142W	PUT1	0.694565	Proline oxidase	mitochondrion
YPL156C	PRM4	0.69319	Pheromone-regulated protein proposed to be involved in mating	N/A
YOR145C	PNO1	0.693065	Essential nucleolar protein required for pre-18S rRNA processing	N/A
YLR420W	URA4	0.691618	Dihydroorotase	cytoplasm,nucleus
YOL067C	RTG1	0.688941	Transcription factor (bHLH) involved in interorganelle communication	cytoplasm,nucleus
YDR371W	CTS2	0.688305	Putative chitinase	cytoplasm
YDL017W	CDC7	0.688088	Ser/Thr kinase and catalytic subunit of DDK (Dbf4-dependent kinase)	cytoplasm,nucleus
YGR065C	VHT1	0.686783	High-affinity plasma membrane H+-biotin (vitamin H) symporter	cell periphery,bud
YGR138C	TPO2	0.686584	Polyamine transporter of the major facilitator superfamily	cell periphery
YPL263C	KEL3	0.686378	Cytoplasmic protein of unknown function	cytoplasm
YIL013C	PDR11	0.686347	ATP-binding cassette (ABC) transporter	N/A
YGL016W	KAP122	0.685378	Karyopherin beta	cytoplasm,nuclear periphery,nucleus
YGR187C	HGH1	0.684797	Chaperone protein for translation factor eEF2	cytoplasm
YOL020W	TAT2	0.683966	High affinity tryptophan and tyrosine permease	cell periphery,vacuole
YGL212W	VAM7	0.683486	Vacuolar SNARE protein	cytoplasm,vacuole
YCL057W	PRD1	0.682612	Zinc metalloendopeptidase	cytoplasm
YDL070W	BDF2	0.682533	Protein involved in transcription initiation	cytoplasm,nucleus
YHR137W	ARO9	0.681972	Aromatic aminotransferase II	cytoplasm,nucleus
YGR250C	YGR250C	0.68136	Putative RNA binding protein	cytoplasm
YKL070W	YKL070W	0.680133	Putative protein of unknown function	N/A
YOR067C	ALG8	0.680005	Glucosyl transferase	N/A
YGR061C	ADE6	0.67824	Formylglycinamidine-ribonucleotide (FGAM)-synthetase	cytoplasm
YNL318C	HXT14	0.677328	Protein with similarity to hexose transporter family members	N/A
YDR468C	TLG1	0.676063	Essential t-SNARE that mediates fusion of vesicles with the late Golgi	N/A
YIL007C	NAS2	0.675494	Evolutionarily conserved 19S regulatory particle assembly-chaperone	cytoplasm
YMR004W	MVP1	0.673303	Protein required for sorting proteins to the vacuole	endosome
YDR247W	VHS1	0.673271	Cytoplasmic serine/threonine protein kinase	cytoplasm
YKL217W	JEN1	0.671774	Monocarboxylate/proton symporter of the plasma membrane	N/A
YMR002W	YMR002W	0.669921	Mitochondrial intermembrane space protein	cytoplasm,nucleus
YDR324C	UTP4	0.669051	Subunit of U3-containing 90S preribosome and SSU processome complexes	nucleolus
YAR066W	YAR066W	0.667847	Putative GPI protein	N/A
YCR038C	BUD5	0.667758	GTP/GDP exchange factor for Rsr1p (Bud1p)	bud neck,cell periphery
YHL047C	ARN2	0.667071	Transporter	N/A
YNR006W	VPS27	0.66579	Endosomal protein that forms a complex with Hse1p	endosome
YER061C	CEM1	0.665621	Mitochondrial beta-keto-acyl synthase	mitochondrion
YHR179W	OYE2	0.664497	Conserved NADPH oxidoreductase containing flavin mononucleotide (FMN)	cytoplasm,nucleus
YKL078W	DHR2	0.663745	Predominantly nucleolar DEAH-box ATP-dependent RNA helicase	nucleolus
YDL210W	UGA4	0.662016	GABA (gamma-aminobutyrate) permease	N/A
YML108W	YML108W	0.662003	Protein of unknown function	cytoplasm,nucleus
YJL016W	YJL016W	0.66068	Putative protein of unknown function	cytoplasm
YEL018W	EAF5	0.659534	Non-essential subunit of the NuA4 acetyltransferase complex	nucleus
YDR116C	MRPL1	0.659434	Mitochondrial ribosomal protein of the large subunit	mitochondrion
YPR133W-A	TOM5	0.659412	Component of the TOM (translocase of outer membrane) complex	N/A
YLR001C	YLR001C	0.657708	Putative protein of unknown function	vacuolar membrane
YLL022C	HIF1	0.65766	Non-essential component of the HAT-B histone acetyltransferase complex	nucleus
YGR271C-A	YGR271C-A	0.656954	Ribosome biogenesis factor required for maturation of 18S rRNA	nucleolus
YDL148C	NOP14	0.656622	Nucleolar protein	N/A
YHR121W	YHR121W	0.656508	Protein of unknown function that may function in RNA processing	cytoplasm,nucleus
YLR313C	SPH1	0.655782	Protein involved in shmoo formation and bipolar bud site selection	ambiguous,bud neck,bud
YDR345C	HXT3	0.655649	Low affinity glucose transporter of the major facilitator superfamily	cell periphery,vacuole
YHR161C	YAP1801	0.654357	Protein of the AP180 family, involved in clathrin cage assembly	ambiguous,bud neck,cell periphery,bud
YIL099W	SGA1	0.652011	Intracellular sporulation-specific glucoamylase	N/A
YOR190W	SPR1	0.651894	Sporulation-specific exo-1,3-beta-glucanase	N/A
YPL001W	HAT1	0.65165	Catalytic subunit of the Hat1p-Hat2p histone acetyltransferase complex	N/A
YGR028W	MSP1	0.651401	Highly-conserved N-terminally anchored AAA-ATPase	mitochondrion
YDR063W	YDR063W	0.649987	Protein that interacts with Arp2/3 complex	cytoplasm,nucleus
YGL029W	CGR1	0.649425	Protein involved in nucleolar integrity and processing of pre-rRNA	nucleus
YLR345W	YLR345W	0.649224	Similar to 6-phosphofructo-2-kinase enzymes	cytoplasm
YOR380W	RDR1	0.649124	Transcriptional repressor involved in regulating multidrug resistance	N/A
YKR045C	YKR045C	0.649069	Putative protein of unknown function	ambiguous
YNL264C	PDR17	0.647063	Phosphatidylinositol transfer protein (PITP)	cytoplasm
YIL055C	YIL055C	0.644254	Putative protein of unknown function	ambiguous
YOR279C	RFM1	0.643586	Component of the Sum1p-Rfm1p-Hst1p complex	cytoplasm,nucleus
YBL056W	PTC3	0.642484	Type 2C protein phosphatase (PP2C)	cytoplasm,nucleus
YPL125W	KAP120	0.642054	Karyopherin responsible for the nuclear import of Rpf1p	cytoplasm,nucleus
YOR127W	RGA1	0.640952	GTPase-activating protein for polarity-regulator Cdc42p (RhoGAP)	bud neck,cytoplasm,cell periphery
YGR037C	ACB1	0.640374	Acyl-CoA-binding protein	cytoplasm,nucleus
YJL005W	CYR1	0.640328	Adenylate cyclase	ambiguous
YAR015W	ADE1	0.639659	N-succinyl-5-aminoimidazole-4-carboxamide ribotide synthetase	cytoplasm,nucleus
YGR125W	YGR125W	0.639257	Putative protein of unknown function	vacuole
YLL057C	JLP1	0.639111	Fe(II)-dependent sulfonate/alpha-ketoglutarate dioxygenase	N/A
YNL147W	LSM7	0.638145	Lsm (Like Sm) protein	cytoplasm
YBR048W	RPS11B	0.637896	Protein component of the small (40S) ribosomal subunit	cytoplasm
YHR119W	SET1	0.637754	Histone methyltransferase, subunit of the COMPASS (Set1C) complex	ambiguous,nucleus
YDR487C	RIB3	0.63758	3,4-dihydroxy-2-butanone-4-phosphate synthase (DHBP synthase)	cytoplasm,nucleus
YOR241W	MET7	0.636115	Folylpolyglutamate synthetase	cytoplasm
YMR080C	NAM7	0.635838	ATP-dependent RNA helicase of the SFI superfamily	cytoplasm,punctate composite
YOR310C	NOP58	0.635538	Protein involved in producing mature rRNAs and snoRNAs	nucleolus
YDR392W	SPT3	0.634601	Subunit of the SAGA and SAGA-like transcriptional regulatory complexes	nucleus
YOR353C	SOG2	0.633755	Key component of the RAM signaling network	cytoplasm
YER020W	GPA2	0.631951	Nucleotide binding alpha subunit of the heterotrimeric G protein	cell periphery
YLR356W	YLR356W	0.631429	Mitochondrial mitophagy-specific protein	mitochondrion
YOR141C	ARP8	0.631037	Nuclear actin-related protein involved in chromatin remodeling	nucleus
YMR035W	IMP2	0.628627	Catalytic subunit of mitochondrial inner membrane peptidase complex	N/A
YMR214W	SCJ1	0.62796	One of several homologs of bacterial chaperone DnaJ	ambiguous
YFL034C-A	RPL22B	0.627382	Ribosomal 60S subunit protein L22A	cytoplasm
YDR430C	CYM1	0.627206	Lysine-specific metalloprotease of the pitrilysin family	mitochondrion
YMR023C	MSS1	0.626682	Mitochondrial protein	cytoplasm,mitochondrion
YMR011W	HXT2	0.626281	High-affinity glucose transporter of the major facilitator superfamily	cell periphery,vacuole
YPR163C	TIF3	0.625803	Translation initiation factor eIF-4B	cytoplasm
YHR159W	YHR159W	0.624469	Putative protein of unknown function	cytoplasm
YKL130C	SHE2	0.624424	RNA-binding protein that binds specific mRNAs and interacts with She3p	cytoplasm,nucleus
YCR107W	AAD3	0.623899	Putative aryl-alcohol dehydrogenase	N/A
YOR016C	ERP4	0.621147	Member of the p24 family involved in ER to Golgi transport	ER
YGR141W	VPS62	0.619848	Vacuolar protein sorting (VPS) protein	N/A
YNR007C	ATG3	0.616641	E2-like enzyme	cytoplasm
YFR033C	QCR6	0.615691	Subunit 6 of the ubiquinol cytochrome-c reductase complex	cytoplasm
YGR096W	TPC1	0.615109	Mitochondrial membrane transporter	mitochondrion
YGR171C	MSM1	0.611195	Mitochondrial methionyl-tRNA synthetase (MetRS)	mitochondrion
YDR313C	PIB1	0.611007	RING-type ubiquitin ligase of the endosomal and vacuolar membranes	ambiguous,endosome
YLR447C	VMA6	0.610211	Subunit d of the V0 integral membrane domain of V-ATPase	vacuolar membrane
YOL062C	APM4	0.60996	Cargo-binding mu subunit of AP-2	bud neck,cell periphery
YML078W	CPR3	0.609927	Mitochondrial peptidyl-prolyl cis-trans isomerase (cyclophilin)	mitochondrion
YPL092W	SSU1	0.608435	Plasma membrane sulfite pump involved in sulfite metabolism	N/A
YHL023C	RMD11	0.608025	Subunit of the Iml1p/SEACIT complex	N/A
YOL097C	WRS1	0.60774	Cytoplasmic tryptophanyl-tRNA synthetase	cytoplasm
YCL034W	LSB5	0.606455	Protein involved in membrane-trafficking events at plasma membrane	cytoplasm,nucleus
YNL112W	DBP2	0.605275	ATP-dependent RNA helicase of the DEAD-box protein family	cytoplasm,nucleus
YML058W-A	HUG1	0.603451	Ribonucleotide reductase inhibitor	cytoplasm
YOR085W	OST3	0.602919	Gamma subunit of the oligosaccharyltransferase complex of the ER lumen	ambiguous
YDR051C	YDR051C	0.60182	Acid phosphatase	cytoplasm,nucleus
YHL013C	YHL013C	0.5995	Protein of unknown function	cytoplasm
YPR008W	HAA1	0.59941	Transcriptional activator involved in adaptation to weak acid stress	cytoplasm
YMR068W	AVO2	0.598132	Component of a complex containing the Tor2p kinase and other proteins	N/A
YJR138W	IML1	0.597945	GTPase-activating protein (GAP) subunit of the Iml1p/SEACIT complex	vacuolar membrane
YLR248W	RCK2	0.597463	Protein kinase involved in response to oxidative and osmotic stress	cytoplasm
YLR120C	YPS1	0.597281	Aspartic protease	ER
YBL071W-A	KTI11	0.597153	Zn-ribbon protein that co-purifies with Dph1 and Dph2	cytoplasm,nucleus
YDL218W	YDL218W	0.595974	Putative protein of unknown function	N/A
YPL239W	YAR1	0.595557	Ankyrin-repeat containing, nucleocytoplasmic shuttling assembly chaper	cytoplasm
YMR290C	HAS1	0.59534	ATP-dependent RNA helicase	N/A
YBR269C	FMP21	0.595179	Protein required for assembly of succinate dehydrogenase	mitochondrion
YPL063W	TIM50	0.59425	Essential component of the TIM23 complex	mitochondrion
YOR160W	MTR10	0.594024	Nuclear import receptor	cytoplasm,nucleus
YER056C	FCY2	0.593775	Purine-cytosine permease	vacuole
YGR240C-A	YGR240C-A	0.593707	Putative protein of unknown function	N/A
YGR054W	YGR054W	0.592881	Eukaryotic initiation factor eIF2A	N/A
YFL010W-A	AUA1	0.592652	Protein required for the negative regulation by ammonia of Gap1p	N/A
YGL047W	YGL047W	0.592652	Catalytic component of UDP-GlcNAc transferase	ER
YNL065W	AQR1	0.589265	Plasma membrane transporter of the major facilitator superfamily	cell periphery,vacuole
YOL045W	PSK2	0.587482	PAS-domain containing serine/threonine protein kinase	cytoplasm
YIL004C	BET1	0.58724	Type II membrane protein required for vesicular transport	ambiguous
YJR078W	BNA2	0.586584	Tryptophan 2,3-dioxygenase or indoleamine 2,3-dioxygenase	N/A
YBR204C	YBR204C	0.586428	Serine hydrolase	N/A
YPL006W	NCR1	0.586353	Vacuolar membrane protein involved with Npc2p in sterol trafficking	vacuolar membrane
YHR001W-A	QCR10	0.586121	Subunit of the ubiqunol-cytochrome c oxidoreductase complex	mitochondrion
YER147C	SCC4	0.585804	Subunit of cohesin loading factor (Scc2p-Scc4p)	cytoplasm,nucleus
YHR171W	ATG7	0.585627	Autophagy-related protein and dual specificity member of the E1 family	N/A
YGL186C	TPN1	0.584916	Plasma membrane pyridoxine (vitamin B6) transporter	ER
YCR028C-A	RIM1	0.584904	ssDNA-binding protein essential for mitochondrial genome maintenance	mitochondrion
YLL052C	AQY2	0.584649	Water channel that mediates water transport across cell membranes	ER
YOL018C	TLG2	0.58444	Syntaxin-like t-SNARE	N/A
YPR002W	PDH1	0.583854	Putative 2-methylcitrate dehydratase	cytoplasm,mitochondrion
YOR081C	STC2	0.581877	Bifunctional triacylglycerol lipase and LPA acyltransferase	lipid particle
YDR352W	YDR352W	0.581505	Putative vacuolar membrane transporter for cationic amino acids	vacuolar membrane
YGR237C	YGR237C	0.581262	Putative protein of unknown function	cytoplasm
YBR058C-A	TSC3	0.580595	Protein that stimulates the activity of serine palmitoyltransferase	ER
YDR049W	YDR049W	0.579784	Peptidyl-tRNA hydrolase that releases stalled peptides from ribosomes,	cytoplasm
YGR266W	YGR266W	0.579401	Protein of unknown function	ER
YBL075C	SSA3	0.579154	ATPase involved in protein folding and the response to stress	cytoplasm
YPL023C	MET12	0.57871	Protein with MTHFR activity in vitro	N/A
YHR011W	DIA4	0.576579	Probable mitochondrial seryl-tRNA synthetase	mitochondrion,punctate composite
YNR037C	RSM19	0.575177	Mitochondrial ribosomal protein of the small subunit	N/A
YBR014C	YBR014C	0.573841	Cis-golgi localized monothiol glutaredoxin	vacuole
YER188C-A	YER188C-A	0.573716	Putative protein of unknown function	N/A
YOR034C	AKR2	0.573211	Ankyrin repeat-containing protein	ambiguous
YGR120C	COG2	0.573002	Essential component of the conserved oligomeric Golgi complex	Golgi,Golgi to ER
YGR059W	SPR3	0.572096	Sporulation-specific homolog of the CDC3/10/11/12 family of genes	N/A
YOR323C	PRO2	0.568139	Gamma-glutamyl phosphate reductase	cytoplasm,nucleus
YER117W	RPL23B	0.567987	Ribosomal 60S subunit protein L23B	nucleus
YLR092W	SUL2	0.567544	High affinity sulfate permease	N/A
YJR133W	XPT1	0.567498	Xanthine-guanine phosphoribosyl transferase	cytoplasm
YOL054W	PSH1	0.567375	E3 ubiquitin ligase targeting centromere-binding protein Cse4p	nucleus
YMR010W	YMR010W	0.567097	Protein involved in phospholipid flippase function	punctate composite,Golgi to ER
YLR454W	FMP27	0.566423	Putative protein of unknown function	ambiguous
YGR048W	UFD1	0.566364	Substrate-recruiting cofactor of the Cdc48p-Npl4p-Ufd1p segregase	cytoplasm,nucleus
YHR202W	YHR202W	0.56615	Putative protein of unknown function	vacuole
YBL089W	AVT5	0.565575	Putative transporter	N/A
YGR260W	TNA1	0.565126	High affinity nicotinic acid plasma membrane permease	ER
YJR059W	PTK2	0.56263	Serine/threonine protein kinase	cytoplasm
YAR075W	YAR075W	0.560967	Non-functional protein with homology IMP dehydrogenase	N/A
YLR089C	ALT1	0.560526	Alanine transaminase (glutamic pyruvic transaminase)	N/A
YDR330W	UBX5	0.56027	UBX domain-containing protein that interacts with Cdc48p	cytoplasm,nucleus
YKL051W	SFK1	0.559706	Protein that regulates phospholipid asymmetry at plasma membrane	cell periphery
YML072C	TCB3	0.558156	Cortical ER protein involved in ER-plasma membrane tethering	cell periphery
YFR038W	YFR038W	0.558066	Putative ATPase containing the DEAD/H helicase-related sequence motif	N/A
YJR034W	PET191	0.558053	Protein required for assembly of cytochrome c oxidase	N/A
YLR190W	MMR1	0.556911	Phosphorylated protein of the mitochondrial outer membrane	ambiguous
YKL127W	PGM1	0.556532	Phosphoglucomutase, minor isoform	cytoplasm
YLR154C	RNH203	0.554799	Ribonuclease H2 subunit	cytoplasm,nucleus
YHR094C	HXT1	0.553525	Low-affinity glucose transporter of the major facilitator superfamily	N/A
YEL075C	YEL075C	0.553472	Putative protein of unknown function	N/A
YPL265W	DIP5	0.551993	Dicarboxylic amino acid permease	cell periphery,vacuole
YDR039C	ENA2	0.551658	P-type ATPase sodium pump	cell periphery
YOR350C	MNE1	0.551021	Protein involved in splicing Group I aI5-beta intron from COX1 mRNA	mitochondrion
YFR044C	YFR044C	0.548777	Cys-Gly metallo-di-peptidase	cytoplasm,mitochondrion
YLR285W	NNT1	0.548465	S-adenosylmethionine-dependent methyltransferase	cytoplasm
YGL007C-A	YGL007C-A	0.54779	Putative protein of unknown function	N/A
YDL168W	SFA1	0.547548	Bifunctional alcohol dehydrogenase and formaldehyde dehydrogenase	cytoplasm
YPL115C	BEM3	0.547308	Rho GTPase activating protein (RhoGAP)	bud neck,cytoplasm
YER060W	FCY21	0.546474	Putative purine-cytosine permease	N/A
YGR261C	APL6	0.545966	Beta3-like subunit of the yeast AP-3 complex	punctate composite,Golgi,Golgi to ER
YDL234C	GYP7	0.545757	GTPase-activating protein for yeast Rab family members	cytoplasm
YBL039C	URA7	0.545109	Major CTP synthase isozyme (see also URA8)	cytoplasm
YHL016C	DUR3	0.542778	Plasma membrane transporter for both urea and polyamines	N/A
YKL161C	YKL161C	0.541974	Protein kinase	N/A
YGR052W	FMP48	0.539809	Putative protein of unknown function	cytoplasm,nucleus
YOL151W	GRE2	0.535938	3-methylbutanal reductase and NADPH-dependent methylglyoxal reductase	cytoplasm,nucleus
YPR046W	MCM16	0.535709	Component of the Ctf19 complex and the COMA subcomplex	nucleus
YHR002W	LEU5	0.535677	Mitochondrial carrier protein	N/A
YOL066C	RIB2	0.535037	Bifunctional DRAP deaminase tRNA:pseudouridine synthase	cytoplasm
YLR150W	STM1	0.534914	Protein required for optimal translation under nutrient stress	cytoplasm
YPL133C	RDS2	0.5334	Transcription factor involved in regulating gluconeogenesis	N/A
YCL068C	YCL068C	0.532586	Putative protein of unknown function	N/A
YJR010W	MET3	0.531362	ATP sulfurylase	cytoplasm
YBR111W-A	SUS1	0.530641	Component of both the SAGA histone acetylase and TREX-2 complexes	N/A
YOL140W	ARG8	0.530313	Acetylornithine aminotransferase	mitochondrion
YJL063C	MRPL8	0.529887	Mitochondrial ribosomal protein of the large subunit	mitochondrion
YPR054W	SMK1	0.529771	Middle sporulation-specific mitogen-activated protein kinase (MAPK)	N/A
YJR131W	MNS1	0.528903	Alpha-1,2-mannosidase	ER
YBL024W	NCL1	0.527442	S-adenosyl-L-methionine-dependent tRNA: m5C-methyltransferase	nucleus
YDL161W	ENT1	0.527002	Epsin-like protein involved in endocytosis and actin patch assembly	actin
YBR186W	PCH2	0.526408	Hexameric ring ATPase that remodels chromosome axis protein Hop1p	N/A
YJR016C	ILV3	0.526273	Dihydroxyacid dehydratase	mitochondrion
YOR306C	MCH5	0.525811	Plasma membrane riboflavin transporter	N/A
YKL090W	CUE2	0.525202	Ubiquitin-binding endonuclease involved in mRNA decay	N/A
YDR009W	GAL3	0.523607	Transcriptional regulator	cytoplasm
YBR107C	IML3	0.522888	Outer kinetochore protein and component of the Ctf19 complex	nucleus,spindle pole
YHR098C	SFB3	0.522824	Component of the Sec23p-Sfb3p heterodimer of the COPII vesicle coat	ER to Golgi
YJL161W	FMP33	0.521709	Putative protein of unknown function	mitochondrion
YAL018C	YAL018C	0.521658	Protein Involved in spore wall assembly	N/A
YDR233C	RTN1	0.521225	Reticulon protein	ER,cell periphery
YLR405W	DUS4	0.521225	Dihydrouridine synthase	ambiguous
YLL046C	RNP1	0.520118	Ribonucleoprotein that contains two RNA recognition motifs (RRM)	N/A
YKR089C	STC1	0.518898	Multifunctional lipase/hydrolase/phospholipase	lipid particle
YBR221C	PDB1	0.518204	E1 beta subunit of the pyruvate dehydrogenase (PDH) complex	mitochondrion
YEL017C-A	PMP2	0.517499	Proteolipid associated with plasma membrane H(+)-ATPase (Pma1p)	cell periphery,vacuole
YGR055W	MUP1	0.517183	High affinity methionine permease	vacuole
YBR258C	SHG1	0.517069	Subunit of the COMPASS (Set1C) complex	nucleus
YLR309C	IMH1	0.517033	Protein involved in vesicular transport	cytoplasm
YGL018C	JAC1	0.516935	Specialized J-protein that functions in Fe-S cluster biogenesis	mitochondrion
YHR005C	GPA1	0.516555	Subunit of G protein involved in pheromone response	cell periphery
YER115C	SPR6	0.516134	Protein of unknown function	N/A
YJR080C	FMP26	0.515426	Protein with a role in determining mitochondrial architecture	mitochondrion
YHR196W	UTP9	0.514828	Nucleolar protein	nucleolus
YNL048W	ALG11	0.51382	Alpha-1,2-mannosyltransferase	ER
YMR115W	FMP24	0.513013	Subunit of the mitochondrial (mt) i-AAA protease supercomplex	mitochondrion
YGL025C	PGD1	0.511806	Subunit of the RNA polymerase II mediator complex	nucleus
YOR321W	PMT3	0.51162	Protein O-mannosyltransferase	ER
YJR150C	DAN1	0.511337	Cell wall mannoprotein	N/A
YCR075C	ERS1	0.508635	Protein involved in cystine transport	N/A
YOR388C	FDH1	0.507634	NAD(+)-dependent formate dehydrogenase	N/A
YBR284W	YBR284W	0.506397	Putative metallo-dependent hydrolase superfamily protein	N/A
YDR246W	TRS23	0.50515	Core component of transport protein particle (TRAPP) complexes I-III	Golgi to vacuole
YGL094C	PAN2	0.504758	Catalytic subunit of the Pan2p-Pan3p poly(A)-ribonuclease complex	cytoplasm
YDL129W	YDL129W	0.504284	Protein of unknown function	cytoplasm,nucleus
YKL068W-A	YKL068W-A	0.503907	Putative protein of unknown function	N/A
YDR106W	ARP10	0.503418	Component of the dynactin complex	N/A
YPL271W	ATP15	0.503315	Epsilon subunit of the F1 sector of mitochondrial F1F0 ATP synthase	mitochondrion
YFR003C	YPI1	0.501416	Regulatory subunit of the type I protein phosphatase (PP1) Glc7p	N/A
YLR412W	YLR412W	0.50091	Protein involved in microtubule-related processes	cytoplasm
YFL054C	YFL054C	0.500854	Putative channel-like protein	N/A
YGL148W	ARO2	0.500709	Bifunctional chorismate synthase and flavin reductase	cytoplasm
YJR132W	NMD5	0.500703	Karyopherin	cytoplasm,nucleus
YOL162W	YOL162W	0.50027	Putative protein of unknown function	N/A
YML116W	ATR1	0.500036	Multidrug efflux pump of the major facilitator superfamily	cell periphery,vacuole
YBR270C	YBR270C	0.499766	Subunit of TORC2 membrane-associated complex	N/A
YDR508C	GNP1	0.499254	Broad specificity amino acid permease	ER,cell periphery
YPL026C	SKS1	0.497322	Putative serine/threonine protein kinase	cytoplasm
YBL103C	RTG3	0.49691	bHLH/Zip transcription factor for retrograde (RTG) and TOR pathways	cytoplasm,nucleus
YOL103W	ITR2	0.496153	Myo-inositol transporter	ambiguous
YJL145W	SFH5	0.495963	Unusual phosphatidylinositol transfer protein (PITP) that binds heme	cytoplasm
YOL089C	HAL9	0.493941	Putative transcription factor containing a zinc finger	cytoplasm,nucleus
YIR029W	DAL2	0.493094	Allantoicase	N/A
YJR099W	YUH1	0.492543	Ubiquitin C-terminal hydrolase	N/A
YER053C	YER053C	0.492307	Mitochondrial copper and phosphate carrier	mitochondrion
YPR065W	ROX1	0.491444	Heme-dependent repressor of hypoxic genes	nucleus
YOL116W	MSN1	0.491329	Transcriptional activator	microtubule
YDR251W	PAM1	0.490749	Essential protein of unknown function	ambiguous,bud neck,bud
YDL144C	YDL144C	0.489803	Protein of unknown function	cytoplasm,nucleus
YDR074W	TPS2	0.489174	Phosphatase subunit of the trehalose-6-P synthase/phosphatase complex	cytoplasm
YLR455W	YLR455W	0.488579	Component of the NuA3b histone acetyltransferase complex	nucleus
YMR292W	GOT1	0.48803	Homodimeric protein that is packaged into COPII vesicles	ER
YML003W	YML003W	0.487952	Putative protein of unknown function	N/A
YPR036W	VMA13	0.487899	Subunit H of the V1 peripheral membrane domain of V-ATPase	vacuolar membrane
YGR001C	YGR001C	0.487833	S-adenosylmethionine-dependent lysine methyltransferase	cytoplasm
YBR056W	YBR056W	0.487522	Putative glycoside hydrolase of the mitochondrial intermembrane space	cytoplasm
YHR060W	VMA22	0.486976	Protein that is required for vacuolar H+-ATPase (V-ATPase) function	ER
YLR360W	VPS38	0.485964	Part of a Vps34p phosphatidylinositol 3-kinase complex	endosome
YDL095W	PMT1	0.48488	Protein O-mannosyltransferase of the ER membrane	ER
YLR037C	DAN2	0.484425	Cell wall mannoprotein	N/A
YBR298C	MAL31	0.483558	Maltose permease	N/A
YDL057W	YDL057W	0.483516	Putative protein of unknown function	N/A
YBR273C	UBX7	0.482584	UBX (ubiquitin regulatory X) domain-containing protein	ER
YML125C	YML125C	0.481197	Putative cytochrome b5 reductase, localized to the plasma membrane	ER
YPR058W	YMC1	0.480567	Secondary mitochondrial inner membrane glycine transporter	N/A
YHR213W-B	YHR213W-B	0.480517	Pseudogenic fragment with similarity to flocculins	N/A
YER087C-B	SBH1	0.480251	Beta subunit of Sec61p ER translocation complex (Sec61p-Sss1p-Sbh1p)	ambiguous
YHR110W	ERP5	0.48017	Protein with similarity to Emp24p and Erv25p	ER
YLR196W	PWP1	0.479339	Protein with WD-40 repeats involved in rRNA processing	cytoplasm,nucleolus,nucleus
YGR134W	CAF130	0.479249	Subunit of the CCR4-NOT transcriptional regulatory complex	cytoplasm
YHR104W	GRE3	0.479076	Aldose reductase	cytoplasm,nucleus
YBR023C	CHS3	0.477018	Chitin synthase III	Golgi to vacuole
YBL036C	YBL036C	0.476162	Putative non-specific single-domain racemase	cytoplasm,nucleus
YJL046W	YJL046W	0.475697	Putative lipoate-protein ligase	N/A
YPR194C	OPT2	0.474454	Oligopeptide transporter	N/A
YDR068W	DOS2	0.47317	Protein of unknown function	cytoplasm
YKL014C	URB1	0.472384	Protein required for the normal accumulation of 25S and 5.8S rRNAs	nucleolus
YGR281W	YOR1	0.472008	Plasma membrane ATP-binding cassette (ABC) transporter	cell periphery
YDL230W	PTP1	0.471094	Phosphotyrosine-specific protein phosphatase	cytoplasm
YHR006W	STP2	0.470932	Transcription factor	cytoplasm,nucleus
YMR018W	YMR018W	0.470876	Peroxisomal membrane signal receptor for peroxisomal matrix proteins	N/A
YAL014C	SYN8	0.470837	Endosomal SNARE related to mammalian syntaxin 8	cytoplasm,nucleus
YJL082W	IML2	0.470603	Protein required for clearance of inclusion bodies	cytoplasm,nucleus
YDL103C	QRI1	0.470332	UDP-N-acetylglucosamine pyrophosphorylase	cytoplasm,nucleus
YDL119C	YDL119C	0.469741	Mitochondrial glycine transporter	mitochondrion
YKR048C	NAP1	0.469712	Histone chaperone and assembly chaperone for Rps6a/b	cytoplasm
YBR155W	CNS1	0.469574	TPR-containing co-chaperone	cytoplasm
YCL050C	APA1	0.468199	AP4A phosphorylase	cytoplasm,nucleus
YJL023C	PET130	0.466395	Protein of unknown function	N/A
YNL282W	POP3	0.463452	Subunit of both RNase MRP and nuclear RNase P	nucleus
YER141W	COX15	0.463101	Heme a synthase	mitochondrion
YLR223C	IFH1	0.462222	Coactivator, regulates transcription of ribosomal protein (RP) genes	nucleus
YOR274W	MOD5	0.460979	Delta 2-isopentenyl pyrophosphate:tRNA isopentenyl transferase	cytoplasm,nucleus
YDL247W	MPH2	0.458554	Alpha-glucoside permease	N/A
YDR369C	XRS2	0.458312	FHA domain-containing component of the Mre11 complex	cytoplasm,nucleus
YDR231C	COX20	0.457751	Mitochondrial inner membrane protein	mitochondrion
YKL072W	STB6	0.457727	Protein that binds Sin3p in a two-hybrid assay	ambiguous
YDR404C	RPB7	0.457046	RNA polymerase II subunit B16	nucleus
YLR267W	BOP2	0.456988	Protein of unknown function	N/A
YBR069C	TAT1	0.45691	Amino acid transporter for valine, leucine, isoleucine, and tyrosine	cell periphery,bud
YPL232W	SSO1	0.456745	Plasma membrane t-SNARE	lipid particle
YNL127W	FAR11	0.456292	Protein involved in recovery from cell cycle arrest	ambiguous
YIL149C	MLP2	0.45452	Myosin-like protein associated with the nuclear envelope	nuclear periphery
YDR332W	YDR332W	0.453915	Double-stranded DNA-dependent helicase of the DExH/D-box family	mitochondrion
YFL034C-B	MOB2	0.453649	Activator of Cbk1p kinase	cytoplasm,cell periphery
YOR106W	VAM3	0.453519	Syntaxin-like vacuolar t-SNARE	N/A
YKR069W	MET1	0.452579	S-adenosyl-L-methionine uroporphyrinogen III transmethylase	N/A
YGR062C	COX18	0.452439	Protein required for membrane insertion of C-terminus of Cox2p	mitochondrion
YFR042W	YFR042W	0.451942	Integral membrane protein of the ER	N/A
YPL059W	GRX5	0.451052	Glutathione-dependent oxidoreductase	mitochondrion
YPL103C	FMP30	0.450268	Protein with a role in maintaining mitochondrial morphology	N/A
YJL205C	NCE101	0.449543	Protein of unknown function	N/A
YOR272W	YTM1	0.449248	Ribosomal assembly factor and 66S pre-ribosomal particle constituent	nucleolus,nucleus
YBR152W	SPP381	0.448876	mRNA splicing factor, component of U4/U6.U5 tri-snRNP	nucleus
YGR079W	YGR079W	0.448653	Putative protein of unknown function	N/A
YDR218C	SPR28	0.448217	Sporulation-specific homolog of the CDC3/10/11/12 family of genes	N/A
YBR166C	TYR1	0.447726	Prephenate dehydrogenase involved in tyrosine biosynthesis	cytoplasm
YDR151C	CTH1	0.446484	Member of the CCCH zinc finger family	N/A
YOL144W	NOP8	0.446087	Nucleolar protein required for 60S ribosomal subunit biogenesis	nucleolus
YCR077C	PAT1	0.445366	Deadenylation-dependent mRNA-decapping factor	cytoplasm
YGR217W	CCH1	0.445108	Voltage-gated high-affinity calcium channel	cytoplasm
YKR104W	NFT1	0.444282	Putative transporter of the MRP subfamily	N/A
YER145C	FTR1	0.443902	High affinity iron permease	cell periphery
YLR004C	YLR004C	0.443098	Putative plasma membrane permease	N/A
YDL086W	YDL086W	0.442832	Putative carboxymethylenebutenolidase	N/A
YOL016C	CMK2	0.442645	Calmodulin-dependent protein kinase	cytoplasm
YJR160C	MPH3	0.440338	Alpha-glucoside permease	N/A
YJR025C	BNA1	0.439205	3-hydroxyanthranilic acid dioxygenase	cytoplasm,nucleus
YIL049W	DFG10	0.438599	Probable polyprenol reductase	N/A
YOR155C	ISN1	0.43832	Inosine 5'-monophosphate (IMP)-specific 5'-nucleotidase	N/A
YHL046C	YHL046C	0.437667	Protein of unknown function	N/A
YOR294W	RRS1	0.437042	Essential protein that binds ribosomal protein L11	N/A
YDL157C	YDL157C	0.436547	Putative protein of unknown function	mitochondrion
YNL129W	YNL129W	0.436215	Nicotinamide riboside kinase	cytoplasm
YOR383C	FIT3	0.436215	Mannoprotein that is incorporated into the cell wall	N/A
YOR341W	RPA190	0.435848	RNA polymerase I largest subunit A190	nucleolus
YDR183W	PLP1	0.43572	Protein that interacts with CCT (chaperonin containing TCP-1) complex	cytoplasm
YAR035W	YAT1	0.434351	Outer mitochondrial carnitine acetyltransferase	N/A
YLL005C	SPO75	0.432803	Meiosis-specific protein of unknown function	N/A
YNL106C	INP52	0.431701	Polyphosphatidylinositol phosphatase	actin
YML076C	WAR1	0.431298	Homodimeric Zn2Cys6 zinc finger transcription factor	nucleus
YJR051W	OSM1	0.431181	Fumarate reductase, catalyzes the reduction of fumarate to succinate	ambiguous,mitochondrion
YER051W	YER051W	0.431014	JmjC domain family histone demethylase specific for H3-K36	N/A
YER119C	AVT6	0.429705	Vacuolar aspartate and glutamate exporter	N/A
YNL297C	MON2	0.429456	Protein with a role in endocytosis and vacuole integrity	punctate composite,Golgi to ER
YLL043W	FPS1	0.429109	Aquaglyceroporin, plasma membrane channel	cell periphery,vacuole
YBR163W	DEM1	0.42877	Mitochondrial 5'-3' exonuclease and sliding exonuclease	mitochondrion
YMR096W	SNZ1	0.428738	Subunit of a two-component pyridoxal-5‚Äô-phosphate synthase	N/A
YGR233C	PHO81	0.427755	Cyclin-dependent kinase (CDK) inhibitor	cytoplasm,nucleus
YJL178C	ATG27	0.427138	Type I membrane protein involved in autophagy and the Cvt pathway	punctate composite
YIL153W	RRD1	0.426521	Peptidyl-prolyl cis/trans-isomerase	cytoplasm,nucleus
YER144C	UBP5	0.425624	Putative ubiquitin-specific protease	N/A
YLR096W	KIN2	0.425439	S/T protein kinase	ambiguous
YLR034C	SMF3	0.425327	Putative divalent metal ion transporter involved in iron homeostasis	ER
YDR406W	PDR15	0.424205	Plasma membrane ATP binding cassette (ABC) transporter	N/A
YKL061W	YKL061W	0.423548	Subunit of the BLOC-1 complex involved in endosomal maturation	endosome
YPL106C	SSE1	0.423061	ATPase component of heat shock protein Hsp90 chaperone complex	cytoplasm
YBR176W	ECM31	0.422657	Ketopantoate hydroxymethyltransferase	mitochondrion
YMR132C	JLP2	0.422061	Protein of unknown function	cytoplasm
YLR239C	LIP2	0.421833	Lipoyl ligase	mitochondrion
YMR229C	RRP5	0.421771	RNA binding protein involved in synthesis of 18S and 5.8S rRNAs	nucleolus
YIR031C	DAL7	0.421051	Malate synthase	N/A
YDR189W	SLY1	0.421037	Hydrophilic protein involved in ER/Golgi vesicle trafficking	Golgi,Golgi to ER
YOR286W	FMP31	0.420452	Protein with rhodanese activity	mitochondrion
YJL213W	YJL213W	0.420302	Protein of unknown function that may interact with ribosomes	N/A
YGR121W-A	YGR121W-A	0.419401	Putative protein of unknown function	N/A
YNL274C	YNL274C	0.41921	Glyoxylate reductase	cytoplasm,nucleus
YOR179C	SYC1	0.418505	Subunit of the APT subcomplex of cleavage and polyadenylation factor	nucleus
YDR441C	APT2	0.416871	Potential adenine phosphoribosyltransferase	cytoplasm
YLR043C	TRX1	0.416615	Cytoplasmic thioredoxin isoenzyme	cytoplasm,nucleus
YOL110W	SHR5	0.416331	Palmitoyltransferase subunit	N/A
YOL108C	INO4	0.416138	Transcription factor involved in phospholipid synthesis	cytoplasm,nucleus
YKL155C	RSM22	0.415548	Mitochondrial ribosomal protein of the small subunit	mitochondrion
YOR273C	TPO4	0.415315	Polyamine transporter of the major facilitator superfamily	cell periphery,bud
YDR400W	URH1	0.414871	Uridine nucleosidase (uridine-cytidine N-ribohydrolase)	cytoplasm,nucleus
YPL186C	UIP4	0.414575	Protein that interacts with Ulp1p	N/A
YLL038C	ENT4	0.414343	Protein of unknown function	ambiguous
YOR288C	MPD1	0.414085	Member of the protein disulfide isomerase (PDI) family	vacuole
YNL332W	THI12	0.413121	Protein involved in synthesis of the thiamine precursor HMP	N/A
YNL182C	IPI3	0.412195	Component of the Rix1 complex and pre-replicative complexes (pre-RCs)	N/A
YOR115C	TRS33	0.411729	Core component of TRAPP complexes I, II and IV	punctate composite
YOR162C	YRR1	0.411098	Zn2-Cys6 zinc-finger transcription factor	cytoplasm,nucleus
YHL024W	RIM4	0.410867	Putative RNA-binding protein	N/A
YLR178C	TFS1	0.410556	Inhibitor of carboxypeptidase Y (Prc1p), and Ras GAP (Ira2p)	cytoplasm,nucleus
YNL136W	EAF7	0.409748	Subunit of the NuA4 histone acetyltransferase complex	nucleus
YDR275W	BSC2	0.409425	Protein of unknown function	lipid particle
YNL061W	NOP2	0.408365	rRNA m5C methyltransferase	nucleolus,nucleus
YLR201C	FMP53	0.407549	Protein required for ubiquinone biosynthesis and respiratory growth	mitochondrion
YOR346W	REV1	0.407434	Deoxycytidyl transferase	cytoplasm,nucleus
YJR091C	JSN1	0.407385	Member of the Puf family of RNA-binding proteins	ambiguous
YOL113W	SKM1	0.407247	Member of the PAK family of serine/threonine protein kinases	ambiguous
YDL093W	PMT5	0.406667	Protein O-mannosyltransferase	N/A
YBR283C	SSH1	0.405768	Subunit of the Ssh1 translocon complex	ER
YML015C	TAF11	0.405489	TFIID subunit (40 kDa)	N/A
YGR275W	RTT102	0.404395	Component of both the SWI/SNF and RSC chromatin remodeling complexes	nucleus
YOR049C	RSB1	0.403884	Sphingoid long-chain base (LCB) efflux transporter	N/A
YJR140C	HIR3	0.402924	Subunit of the HIR complex	nucleus
YOR153W	PDR5	0.402888	Plasma membrane ATP-binding cassette (ABC) transporter	cell periphery
YFL012W	YFL012W	0.402563	Putative protein of unknown function	N/A
YDL077C	VAM6	0.400152	Guanine nucleotide exchange factor for the GTPase Gtr1p	ambiguous
YNR076W	PAU6	0.399894	Member of the seripauperin multigene family	N/A
YHR079C-A	SAE3	0.399719	Meiosis-specific protein involved in meiotic recombination	N/A
YGL002W	ERP6	0.399368	Member of the p24 family involved in ER to Golgi transport	N/A
YNL041C	COG6	0.399217	Component of the conserved oligomeric Golgi complex	Golgi
YBR056W-A	YBR056W-A	0.398963	Putative membrane protein upregulated in toxic manganese levels	N/A
YDR164C	SEC1	0.398789	Sm-like protein involved in docking and fusion of exocytic vesicles	ambiguous,bud neck,cytoplasm,bud
YGR111W	YGR111W	0.398632	Putative protein of unknown function	cytoplasm,nucleus
YNL083W	YNL083W	0.397691	ADP/ATP transporter	mitochondrion
YLR241W	YLR241W	0.397201	Calcium permeable gated cation channel	N/A
YDR454C	GUK1	0.396652	Guanylate kinase	cytoplasm,nucleus
YDR014W	RAD61	0.396366	Subunit of a complex that inhibits sister chromatid cohesion	nucleus
YGR043C	YGR043C	0.395329	Transaldolase of unknown function	nucleus
YCL058C	FYV5	0.395315	Protein involved in regulation of the mating pathway	N/A
YJL039C	NUP192	0.394782	Essential subunit of inner ring of nuclear pore complex (NPC)	nuclear periphery
YLR154W-E	YLR154W-E	0.394153	Dubious open reading frame	N/A
YGL003C	CDH1	0.393972	Activator of anaphase-promoting complex/cyclosome (APC/C)	N/A
YPR105C	COG4	0.393628	Essential component of the conserved oligomeric Golgi complex	Golgi to ER
YGR102C	YGR102C	0.392112	Subunit of the trimeric GatFAB AmidoTransferase(AdT) complex	mitochondrion
YML119W	YML119W	0.392106	Putative protein of unknown function	N/A
YNR072W	HXT17	0.391308	Putative transmembrane polyol transporter	N/A
YBL002W	HTB2	0.390926	Histone H2B	nucleus
YPR075C	OPY2	0.390771	Integral membrane protein that acts as a membrane anchor for Ste50p	vacuole
YNR034W	SOL1	0.390572	Protein with a possible role in tRNA export	cytoplasm,nucleus
YDR253C	MET32	0.390257	Zinc-finger DNA-binding transcription factor	cytoplasm,nucleus
YKL007W	CAP1	0.389394	Alpha subunit of the capping protein heterodimer (Cap1p and Cap2p)	actin
YAL022C	FUN26	0.3891	High affinity, broad selectivity, nucleoside/nucleobase transporter	N/A
YHR170W	NMD3	0.388925	Protein involved in nuclear export of the large ribosomal subunit	cytoplasm
YCL036W	GFD2	0.387374	Protein of unknown function	N/A
YJL093C	TOK1	0.387293	Outward-rectifier potassium channel of the plasma membrane	N/A
YLR448W	RPL6B	0.386917	Ribosomal 60S subunit protein L6B	cytoplasm
YCR082W	YCR082W	0.386508	Component of the ADA histone acetyltransferase complex	cytoplasm,nucleus
YER157W	COG3	0.385652	Essential component of the conserved oligomeric Golgi complex	Golgi,Golgi to ER
YHR142W	CHS7	0.385649	Protein of unknown function	ambiguous,bud neck,cytoplasm,vacuole,bud
YLR456W	YLR456W	0.385404	Protein of unknown function	N/A
YIL102C	YIL102C	0.385162	Putative protein of unknown function	N/A
YAR002W	NUP60	0.384761	FG-nucleoporin component of central core of the nuclear pore complex	nuclear periphery
YCR105W	ADH7	0.384637	NADPH-dependent medium chain alcohol dehydrogenase	N/A
YIR004W	DJP1	0.384479	ER-associated chaperone involved in protein targeting	ER
YOL095C	HMI1	0.384124	Mitochondrial inner membrane localized ATP-dependent DNA helicase	N/A
YPL179W	PPQ1	0.384025	Protein phosphatase that regulates the mating response	cytoplasm
YGR057C	LST7	0.383687	Subunit of the Lst4p-Lst7p GTPase activating protein complex for Gtr2p	N/A
YER093C	TSC11	0.383393	Subunit of TORC2 (Tor2p-Lst8p-Avo1-Avo2-Tsc11p-Bit61p)	N/A
YOR222W	ODC2	0.383276	Mitochondrial inner membrane transporter	N/A
YKR036C	CAF4	0.38308	WD40 repeat-containing protein associated with the CCR4-NOT complex	mitochondrion
YLR446W	YLR446W	0.382912	Putative hexokinase	N/A
YGL198W	YIP4	0.382084	Protein that interacts with Rab GTPases	N/A
YLR038C	COX12	0.382017	Subunit VIb of cytochrome c oxidase	cytoplasm
YDL091C	UBX3	0.380093	Clathrin-coated vesicle component, regulator of endocytosis	punctate composite
YHL049C	YHL049C	0.379567	Putative protein of unknown function	N/A
YHR197W	RIX1	0.379428	Component of the Rix1 complex and possibly pre-replicative complexes	nucleus
YDR272W	GLO2	0.37921	Cytoplasmic glyoxalase II	cytoplasm,nucleus
YLR438C-A	LSM3	0.378967	Lsm (Like Sm) protein	cytoplasm,nucleus
YEL071W	DLD3	0.378889	2-hydroxyglutarate transhydrogenase, and minor D-lactate dehydrogenase	cytoplasm,nucleus
YBR059C	AKL1	0.378787	Ser/Thr protein kinase	bud neck,cytoplasm,cell periphery
YJL170C	ASG7	0.378592	Protein that regulates signaling from G protein beta subunit Ste4p	N/A
YDR144C	MKC7	0.378508	GPI-anchored aspartyl protease	vacuole
YGR189C	CRH1	0.378477	Chitin transglycosylase	cytoplasm
YHL028W	WSC4	0.378427	Endoplasmic reticulum (ER) membrane protein	vacuole
YDL233W	YDL233W	0.37826	Regulator of filamentous growth	cytoplasm,nucleus
YLR213C	CRR1	0.377969	Putative glycoside hydrolase of the spore wall envelope	N/A
YCL001W-B	YCL001W-B	0.376857	Putative protein of unknown function	N/A
YNL173C	MDG1	0.376857	Plasma membrane protein	punctate composite
YFR045W	YFR045W	0.376164	Putative mitochondrial transport protein	N/A
YKR049C	FMP46	0.376121	Putative redox protein containing a thioredoxin fold	mitochondrion
YPL015C	HST2	0.376038	Cytoplasmic NAD(+)-dependent protein deacetylase	cytoplasm
YHL042W	YHL042W	0.375344	Endoplasmic reticulum protein	N/A
YIL042C	YIL042C	0.374407	Mitochondrial protein kinase	mitochondrion
YDR037W	KRS1	0.371807	Lysyl-tRNA synthetase	N/A
YPL089C	RLM1	0.371452	MADS-box transcription factor	cytoplasm,nucleus
YKR056W	TRM2	0.370717	tRNA methyltransferase	N/A
YJR152W	DAL5	0.369788	Allantoate permease	N/A
YBR105C	VID24	0.369529	GID Complex regulatory subunit	cytoplasm,nucleus
YLR393W	ATP10	0.368283	Assembly factor for the F0 sector of mitochondrial F1F0 ATP synthase	mitochondrion
YDR017C	KCS1	0.367721	Inositol hexakisphosphate and inositol heptakisphosphate kinase	cytoplasm
YBR182C-A	YBR182C-A	0.367519	Putative protein of unknown function	N/A
YIL068C	SEC6	0.366802	Essential 88kDa subunit of the exocyst complex	ambiguous,bud neck,cell periphery,bud
YDL159W	STE7	0.366781	Signal transducing MAP kinase kinase	cytoplasm
YFL011W	HXT10	0.366467	Hexose transporter	N/A
YER002W	NOP16	0.36646	Constituent of 66S pre-ribosomal particles	nucleolus,nucleus
YFL033C	RIM15	0.366146	Protein kinase involved in cell proliferation in response to nutrients	cytoplasm
YJL047C-A	YJL047C-A	0.365712	Putative protein of unknown function	N/A
YDL203C	YDL203C	0.365544	Protein that functions in the cell wall integrity pathway	ambiguous
YIL134C-A	YIL134C-A	0.36396	Putative protein of unknown function	N/A
YLR328W	NMA1	0.363442	Nicotinic acid mononucleotide adenylyltransferase	cytoplasm,nucleus
YHR025W	THR1	0.362922	Homoserine kinase	ambiguous
YLL033W	GON2	0.362895	Protein of unknown function	N/A
YOR281C	PLP2	0.362875	Protein that interacts with the CCT complex to stimulate actin folding	cytoplasm
YLR133W	CKI1	0.361848	Choline kinase	cytoplasm
YCR019W	MAK32	0.361344	Protein necessary for stability of L-A dsRNA-containing particles	N/A
YKL138C	MRPL31	0.361101	Mitochondrial ribosomal protein of the large subunit	mitochondrion
YJL036W	SNX4	0.360551	Sorting nexin	endosome
YPL268W	PLC1	0.360279	Phospholipase C	N/A
YGR206W	YGR206W	0.35998	ESCRT-I subunit required to stabilize ESCRT-I core complex oligomers	endosome
YOR167C	RPS28A	0.359423	Protein component of the small (40S) ribosomal subunit	cytoplasm
YHR134W	WSS1	0.357548	SUMO-ligase and SUMO-targeted metalloprotease	N/A
YNL202W	SPS19	0.35719	Peroxisomal 2,4-dienoyl-CoA reductase	N/A
YBR285W	YBR285W	0.356427	Putative protein of unknown function	N/A
YNL333W	SNZ2	0.35635	Protein involved in thiamine and pyridoxine biosynthesis	N/A
YLR206W	ENT2	0.355635	Epsin-like protein required for endocytosis and actin patch assembly	actin
YOR202W	HIS3	0.354423	Imidazoleglycerol-phosphate dehydratase	N/A
YDL137W	ARF2	0.354053	ADP-ribosylation factor	Golgi to ER,Golgi to vacuole
YDR297W	SUR2	0.353958	Sphinganine C4-hydroxylase	ER
YOL051W	GAL11	0.353903	Subunit of the RNA polymerase II mediator complex	nucleus
YJL058C	BIT61	0.3535	Subunit of TORC2 membrane-associated complex	cytoplasm
YER086W	ILV1	0.353247	Threonine deaminase, catalyzes first step in isoleucine biosynthesis	mitochondrion
YDL133W	YDL133W	0.352953	Regulator of phospholipase D (Spo14p)	N/A
YDR432W	NPL3	0.352017	RNA-binding protein	nucleus
YMR138W	CIN4	0.351364	GTP-binding protein involved in beta-tubulin (Tub2p) folding	cytoplasm
YHL035C	VMR1	0.350872	Vacuolar membrane protein	N/A
YLR268W	SEC22	0.350355	R-SNARE protein	Golgi
YDL223C	HBT1	0.349701	Shmoo tip protein, substrate of Hub1p ubiquitin-like protein	cytoplasm
YER096W	SHC1	0.349596	Sporulation-specific activator of Chs3p (chitin synthase III)	N/A
YBR188C	NTC20	0.349562	Member of the NineTeen Complex (NTC)	nucleus
YDR520C	YDR520C	0.349373	Putative Zn(II)2Cys6 motif containing transcription factor	cytoplasm,nucleus
YFL047W	RGD2	0.347729	GTPase-activating protein (RhoGAP) for Cdc42p and Rho5p	bud neck,cytoplasm,cell periphery
YIL006W	YIL006W	0.347479	Mitochondrial NAD+ transporter	N/A
YJR052W	RAD7	0.347176	Nucleotide excision repair (NER) protein	cytoplasm,nucleus
YLR121C	YPS3	0.346826	Aspartic protease	mitochondrion
YLR066W	SPC3	0.346763	Subunit of signal peptidase complex	ER
YBR076W	ECM8	0.346696	Non-essential protein of unknown function	N/A
YHR176W	FMO	0.346474	Flavin-containing monooxygenase	N/A
YCR094W	CDC50	0.345644	Endosomal protein that interacts with phospholipid flippase Drs2p	Golgi to vacuole
YOL031C	SIL1	0.345453	Nucleotide exchange factor for the ER lumenal Hsp70 chaperone Kar2p	ambiguous
YPR187W	RPO26	0.345104	RNA polymerase subunit ABC23	cytoplasm,nucleus
YGL155W	CDC43	0.344862	Beta subunit of geranylgeranyltransferase type I	cytoplasm,nucleus
YDR358W	GGA1	0.344592	Golgi-localized protein with homology to gamma-adaptin	cytoplasm,Golgi to vacuole
YJR043C	POL32	0.344364	Third subunit of DNA polymerase delta	cytoplasm,nucleus
YGR271W	SLH1	0.344281	Subunit of ribosome-associated quality control trigger complex (RQT)	cytoplasm
YOR206W	NOC2	0.344072	Protein involved in ribosome biogenesis	nucleolus,nucleus
YMR128W	ECM16	0.343386	Essential DEAH-box ATP-dependent RNA helicase specific to U3 snoRNP	nucleolus
YDR378C	LSM6	0.343343	Lsm (Like Sm) protein	N/A
YAR031W	PRM9	0.34283	Pheromone-regulated protein	N/A
YML028W	TSA1	0.342169	Thioredoxin peroxidase	cytoplasm,punctate composite
YDL040C	NAT1	0.341235	Subunit of protein N-terminal acetyltransferase NatA	cytoplasm
YPL058C	PDR12	0.340516	Plasma membrane ATP-binding cassette (ABC) transporter	cell periphery
YDL005C	MED2	0.340512	Subunit of the RNA polymerase II mediator complex	nucleus
YDR264C	AKR1	0.338698	Palmitoyl transferase involved in protein palmitoylation	Golgi,Golgi to ER
YPL195W	APL5	0.338029	Delta adaptin-like subunit of the clathrin associated protein complex	Golgi to ER
YGL231C	YGL231C	0.337729	Member of conserved ER transmembrane complex	ER
YIL176C	YIL176C	0.337688	Protein of unknown function	N/A
YAL024C	LTE1	0.337579	Protein similar to GDP/GTP exchange factors	cytoplasm
YLR388W	RPS29A	0.337414	Protein component of the small (40S) ribosomal subunit	cytoplasm
YFR047C	BNA6	0.33736	Quinolinate phosphoribosyl transferase	cytoplasm,nucleus
YJR122W	CAF17	0.336757	Protein involved in incorporating iron-sulfur clusters into proteins	mitochondrion
YAL031C	FUN21	0.336634	Cytoplasmic protein that regulates protein phosphatase 1 Glc7p	cytoplasm
YDR512C	EMI1	0.336238	Non-essential protein of unknown function	N/A
YAL041W	CDC24	0.335515	Guanine nucleotide exchange factor (GEF) for Cdc42p	cytoplasm,nucleus
YLR199C	YLR199C	0.335432	Protein involved in 20S proteasome assembly	cytoplasm
YNL207W	RIO2	0.335228	Essential serine kinase involved in the processing of 20S pre-rRNA	cytoplasm
YHR160C	PEX18	0.334749	Peroxin	N/A
YOR011W	AUS1	0.334094	Plasma membrane sterol transporter of the ATP-binding cassette family	N/A
YOR265W	RBL2	0.334063	Protein involved in microtubule morphogenesis	cytoplasm
YLR108C	YLR108C	0.333876	Protein of unknown function	nucleus
YGR105W	VMA21	0.333303	Integral membrane protein required for V-ATPase function	vacuole
YDL110C	YDL110C	0.331836	Regulatory gamma subunit of fatty acid synthase (FAS)	cytoplasm,nucleus
YPR018W	RLF2	0.33169	Largest subunit (p90) of the Chromatin Assembly Complex (CAF-1)	N/A
YNL007C	SIS1	0.33145	Type II HSP40 co-chaperone that interacts with the HSP70 protein Ssa1p	cytoplasm,nucleus
YGR159C	NSR1	0.331384	Nucleolar protein that binds nuclear localization sequences	nucleolus
YDL208W	NHP2	0.330957	Protein related to mammalian high mobility group (HMG) proteins	nucleolus
YKR016W	FMP13	0.330239	Component of the MICOS complex	ambiguous,mitochondrion
YDR286C	YDR286C	0.330171	Mitochondrial protein of unknown function	N/A
YER182W	FMP10	0.328623	Putative protein of unknown function	mitochondrion
YLR295C	ATP14	0.327543	Subunit h of the F0 sector of mitochondrial F1F0 ATP synthase	mitochondrion
YBR008C	FLR1	0.327456	Plasma membrane transporter of the major facilitator superfamily	cell periphery,vacuole
YJR070C	LIA1	0.325696	Deoxyhypusine hydroxylase	cytoplasm,nucleus
YCR024C-A	PMP1	0.325385	Regulatory subunit for the plasma membrane H(+)-ATPase Pma1p	N/A
YGR220C	MRPL9	0.324867	Mitochondrial ribosomal protein of the large subunit	mitochondrion
YCL073C	YCL073C	0.324119	Proton:glutathione antiporter	N/A
YMR053C	STB2	0.323381	Protein that interacts with Sin3p in a two-hybrid assay	N/A
YER048C	CAJ1	0.323186	Nuclear type II J heat shock protein of the E. coli dnaJ family	N/A
YJR031C	GEA1	0.322464	Guanine nucleotide exchange factor for ADP ribosylation factors (ARFs)	Golgi
YDL061C	RPS29B	0.321668	Protein component of the small (40S) ribosomal subunit	cytoplasm
YOL042W	NGL1	0.321618	Putative endonuclease	mitochondrion
YDL154W	MSH5	0.321371	Protein of the MutS family	N/A
YGL161C	YIP5	0.321258	Protein that interacts with Rab GTPases	cytoplasm
YLR079W	SIC1	0.320616	Cyclin-dependent kinase inhibitor (CKI)	cytoplasm,nucleus
YBL112C	YBL112C	0.320444	Putative protein of unknown function	N/A
YMR203W	TOM40	0.320394	Component of the TOM (translocase of outer membrane) complex	N/A
YFL057C	AAD16	0.319781	Putative aryl alcohol dehydrogenase	N/A
YBR231C	AOR1	0.319668	Component of the SWR1 complex	nucleus
YKL124W	SSH4	0.319633	Specificity factor required for Rsp5p-dependent ubiquitination	N/A
YHR056C	RSC30	0.319167	Component of the RSC chromatin remodeling complex	N/A
YDL043C	PRP11	0.318814	Subunit of the SF3a splicing factor complex	nucleus
YOR148C	SPP2	0.318228	Essential protein that promotes the first step of splicing	cytoplasm,nucleus
YLR204W	QRI5	0.317572	Mitochondrial inner membrane protein	mitochondrion
YDR424C	DYN2	0.317545	Cytoplasmic light chain dynein, microtubule motor protein	ER
YCL032W	STE50	0.317097	Adaptor protein for various signaling pathways	cytoplasm
YDL018C	ERP3	0.317049	Protein with similarity to Emp24p and Erv25p	ER
YLR318W	EST2	0.316797	Reverse transcriptase subunit of the telomerase holoenzyme	N/A
YPL163C	SVS1	0.316758	Cell wall and vacuolar protein	vacuole
YDR443C	SSN2	0.316397	Subunit of the RNA polymerase II mediator complex	cytoplasm,nucleus
YML088W	UFO1	0.316095	F-box receptor protein	cytoplasm
YPL149W	ATG5	0.315881	Conserved protein involved in autophagy and the Cvt pathway	N/A
YDL237W	YDL237W	0.315844	Protein of unknown function	N/A
YLR461W	PAU4	0.315822	Member of the seripauperin multigene family	N/A
YNL310C	FMP28	0.315436	Protein co-chaperone with a zinc finger motif	mitochondrion
YBR036C	CSG2	0.315119	Endoplasmic reticulum membrane protein	ER,vacuole
YJL201W	ECM25	0.314986	Non-essential protein of unknown function	cytoplasm
YOL075C	YOL075C	0.312461	Putative ABC transporter	N/A
YPR179C	HDA3	0.312461	Subunit of the HDA1 histone deacetylase complex	nucleus
YPR156C	TPO3	0.311767	Polyamine transporter of the major facilitator superfamily	cell periphery
YPR200C	ARR2	0.31114	Arsenate reductase required for arsenate resistance	N/A
YGL242C	YGL242C	0.311106	Protein of unknown function	N/A
YMR152W	YIM1	0.310917	Aldehyde reductase involved in detoxification of lignocellulose-derive	ER
YBR222C	PCS60	0.310908	Oxalyl-CoA synthetase	cytoplasm
YAL030W	SNC1	0.310892	Vesicle membrane receptor protein (v-SNARE)	N/A
YDR262W	YDR262W	0.309498	Putative protein of unknown function	vacuole
YGL145W	TIP20	0.309323	Peripheral membrane protein required for COPI vesicle fusion to the ER	ER
YLR215C	CDC123	0.308943	Assembly factor for the eIF2 translation initiation factor complex	cytoplasm
YHR205W	SCH9	0.307695	AGC family protein kinase	cytoplasm
YCR097W	HMRA1	0.307531	Silenced copy of a1 at HMR	N/A
YDR482C	CWC21	0.307456	Protein involved in RNA splicing by the spliceosome	cytoplasm,nucleus
YLR344W	RPL26A	0.307047	Ribosomal 60S subunit protein L26A	cytoplasm
YBR219C	YBR219C	0.306891	Putative protein of unknown function	N/A
YLL015W	BPT1	0.306822	ABC type transmembrane transporter of MRP/CFTR family	vacuolar membrane
YDL130W-A	STF1	0.305516	Protein involved in regulation of the mitochondrial F1F0-ATP synthase	mitochondrion
YKR094C	RPL40B	0.305411	Ubiquitin-ribosomal 60S subunit protein L40B fusion protein	cytoplasm
YBR022W	YBR022W	0.305333	Phosphatase that is highly specific for ADP-ribose 1''-phosphate	N/A
YER053C-A	YER053C-A	0.303829	Protein of unknown function	ER
YHL025W	SNF6	0.303189	Subunit of the SWI/SNF chromatin remodeling complex	nucleus
YPL126W	NAN1	0.301984	U3 snoRNP protein	nucleolus
YBL064C	PRX1	0.301798	Mitochondrial peroxiredoxin with thioredoxin peroxidase activity	mitochondrion
YGL082W	YGL082W	0.301332	Putative protein of unknown function	cytoplasm,nucleus
YBR171W	SEC66	0.301255	Non-essential subunit of Sec63 complex	ER
YLL042C	ATG10	0.301022	Conserved E2-like conjugating enzyme	N/A
YMR162C	DNF3	0.300854	Trans-golgi network aminophospholipid translocase (flippase)	cytoplasm
YDL047W	SIT4	0.300824	Ceramide-activated, type 2A-related serine-threonine phosphatase	cytoplasm,nucleus
YGR238C	KEL2	0.299668	Protein that negatively regulates mitotic exit	ambiguous,cell periphery,bud
YPL085W	SEC16	0.299306	COPII vesicle coat protein required for ER transport vesicle budding	ER to Golgi
YCR059C	YIH1	0.299152	Negative regulator of eIF2 kinase Gcn2p	cytoplasm,nucleus
YLL061W	MMP1	0.299048	High-affinity S-methylmethionine permease	ER
YFR037C	RSC8	0.298955	Component of the RSC chromatin remodeling complex	nucleus
YLR182W	SWI6	0.298831	Transcription cofactor	nucleus
YOR197W	MCA1	0.298767	Ca2+-dependent cysteine protease	cytoplasm,nucleus
YLR058C	SHM2	0.298748	Cytosolic serine hydroxymethyltransferase	cytoplasm,nucleus
YGR015C	YGR015C	0.298696	Ethanol acetyltransferase	mitochondrion
YNL281W	HCH1	0.296257	Heat shock protein regulator	cytoplasm,nucleus
YNL139C	RLR1	0.295692	Subunit of the THO complex	nucleus
YDR101C	ARX1	0.295322	Nuclear export factor for the ribosomal pre-60S subunit	nucleus
YFL062W	COS4	0.295191	Endosomal protein involved in turnover of plasma membrane proteins	vacuole
YFL026W	STE2	0.29472	Receptor for alpha-factor pheromone	vacuole
YNL339C	YRF1-6	0.294661	Helicase encoded by the Y' element of subtelomeric regions	N/A
YLR323C	CWC24	0.294344	General splicing factor	nucleus
YLL063C	AYT1	0.293932	Acetyltransferase	N/A
YHR211W	FLO5	0.293911	Lectin-like cell wall protein (flocculin) involved in flocculation	N/A
YDL182W	LYS20	0.293408	Homocitrate synthase isozyme and functions in DNA repair	nucleus
YDR242W	AMD2	0.292977	Putative amidase	N/A
YBR254C	TRS20	0.292942	Core component of transport protein particle (TRAPP) complexes I-III	Golgi to vacuole
YML048W	GSF2	0.292704	Endoplasmic reticulum (ER) localized integral membrane protein	ER
YKL088W	YKL088W	0.292649	Subunit of PPCDC and CoA-SPC complexes involved in CoA biosynthesis	cytoplasm
YGL015C	YGL015C	0.292598	Putative protein of unknown function	N/A
YHR008C	SOD2	0.292529	Mitochondrial manganese superoxide dismutase	mitochondrion
YDR179C	CSN9	0.292457	Subunit of the Cop9 signalosome	cytoplasm
YBR200W-A	YBR200W-A	0.291967	Putative protein of unknown function	N/A
YOL100W	PKH2	0.291548	Serine/threonine protein kinase	cytoplasm
YPR119W	CLB2	0.291076	B-type cyclin involved in cell cycle progression	ambiguous,nucleus
YKL094W	YJU3	0.291032	Monoglyceride lipase (MGL) that hydrolyzes fatty acid ethyl esters	ER
YLR091W	YLR091W	0.290794	Protein of unknown function	mitochondrion
YDL106C	PHO2	0.290651	Homeobox transcription factor	nucleus
YGR255C	COQ6	0.289941	Flavin-dependent monooxygenase involved in ubiquinone biosynthesis	mitochondrion,punctate composite
YOR313C	SPS4	0.289418	Protein whose expression is induced during sporulation	N/A
YJL192C	SOP4	0.289174	ER-membrane protein	ER
YGR167W	CLC1	0.289124	Clathrin light chain	Golgi to vacuole
YGL219C	MDM34	0.288566	Mitochondrial component of the ERMES complex	mitochondrion,punctate composite
YCR011C	ADP1	0.288482	Putative ATP-dependent permease of the ABC transporter family	ER
YML041C	VPS71	0.287967	Nucleosome-binding component of the SWR1 complex	nucleus
YKR052C	MRS4	0.287771	Iron transporter of the mitochondrial carrier family	mitochondrion
YNR074C	YNR074C	0.287638	Mitochondrial cell death effector	N/A
YER047C	SAP1	0.287402	Putative ATPase of the AAA family	cytoplasm
YNL275W	YNL275W	0.287362	Boron efflux transporter of the plasma membrane	ambiguous
YKR019C	IRS4	0.286019	EH domain-containing protein	N/A
YLR251W	SYM1	0.286019	Protein required for ethanol metabolism	N/A
YLR093C	NYV1	0.285802	v-SNARE component of the vacuolar SNARE complex	vacuole
YHL048C-A	YHL048C-A	0.285586	Putative protein of unknown function	N/A
YOR094W	ARF3	0.285529	Glucose-repressible ADP-ribosylation factor	cell periphery
YLL021W	SPA2	0.285261	Component of the polarisome	N/A
YPL113C	YPL113C	0.284839	Glyoxylate reductase	N/A
YGR117C	YGR117C	0.284189	Putative protein of unknown function	cytoplasm
YGR021W	YGR021W	0.283313	Putative mitochondrial protein of unknown function	mitochondrion
YHR214C-E	YHR214C-E	0.282672	Putative protein of unknown function	N/A
YFL048C	EMP47	0.281825	Integral membrane component of ER-derived COPII-coated vesicles	vacuolar membrane
YNL308C	KRI1	0.281463	Essential nucleolar protein required for 40S ribosome biogenesis	cytoplasm,nucleolus
YNR050C	LYS9	0.281289	Saccharopine dehydrogenase (NADP+, L-glutamate-forming)	cytoplasm
YBR080C	SEC18	0.28098	AAA ATPase and SNARE disassembly chaperone	Golgi,Golgi to ER
YIL107C	PFK26	0.280641	6-phosphofructo-2-kinase	cytoplasm
YDL001W	RMD1	0.279605	Cytoplasmic protein required for sporulation	cytoplasm
YPL022W	RAD1	0.279397	Single-stranded DNA endonuclease (with Rad10p)	nucleus
YLR337C	VRP1	0.278823	Verprolin, proline-rich actin-associated protein	punctate composite,actin
YKL016C	ATP7	0.278272	Subunit d of the stator stalk of mitochondrial F1F0 ATP synthase	mitochondrion
YJR040W	GEF1	0.278078	Voltage-gated chloride channel	N/A
YGR276C	RNH70	0.277991	3'-5' exoribonuclease	N/A
YGR209C	TRX2	0.27658	Cytoplasmic thioredoxin isoenzyme	cytoplasm,nucleus
YKL062W	MSN4	0.276209	Stress-responsive transcriptional activator	N/A
YEL049W	PAU2	0.276078	Member of the seripauperin multigene family	N/A
YML021C	UNG1	0.276	Uracil-DNA glycosylase	cytoplasm,nucleus
YML008C	ERG6	0.275665	Delta(24)-sterol C-methyltransferase	lipid particle
YPL135W	ISU1	0.275011	Conserved protein of the mitochondrial matrix	mitochondrion
YHR022C	YHR022C	0.274797	Putative protein of unknown function	N/A
YOL026C	MIM1	0.274797	Mitochondrial protein required for outer membrane protein import	N/A
YCR090C	YCR090C	0.274371	Putative protein of unknown function	cytoplasm,nucleus
YOR205C	FMP38	0.272955	Protein required for mitochondrial ribosome small subunit biogenesis	mitochondrion
YNL292W	PUS4	0.271831	Pseudouridine synthase	cytoplasm,nucleus
YLR431C	ATG23	0.270773	Peripheral membrane protein required for autophagy and CVT	N/A
YAR003W	SWD1	0.270508	Subunit of the COMPASS (Set1C) complex	nucleus
YER031C	YPT31	0.270508	Rab family GTPase	cytoplasm,nucleus
YER046W	SPO73	0.269024	Meiosis-specific protein required for prospore membrane morphogenesis	N/A
YGL166W	CUP2	0.268836	Copper-binding transcription factor	cytoplasm,nucleus
YJL088W	ARG3	0.268071	Ornithine carbamoyltransferase	cytoplasm,nucleus
YMR121C	RPL15B	0.267737	Ribosomal 60S subunit protein L15B	nucleolus,nucleus
YBR246W	YBR246W	0.266601	Methylesterase performing penultimate step of diphthamide biosynthesis	N/A
YDR343C	HXT6	0.266601	High-affinity glucose transporter	cell periphery
YKR065C	FMP18	0.266557	Constituent of the TIM23 complex	mitochondrion
YAR050W	FLO1	0.26612	Lectin-like protein involved in flocculation	N/A
YER060W-A	FCY22	0.265927	Putative purine-cytosine permease	N/A
YGL081W	YGL081W	0.265761	Putative protein of unknown function	N/A
YBR208C	DUR1,2	0.265681	Urea amidolyase	cytoplasm
YJL029C	VPS53	0.265168	Component of the GARP (Golgi-associated retrograde protein) complex	punctate composite,Golgi to ER
YPL028W	ERG10	0.263355	Acetyl-CoA C-acetyltransferase (acetoacetyl-CoA thiolase)	nucleus
YOR270C	VPH1	0.262633	Subunit a of the vacuolar-ATPase V0 domain	vacuolar membrane
YBR235W	YBR235W	0.262023	Vacuolar membrane cation-chloride cotransporter (CCC)	ambiguous
YNL279W	PRM1	0.261747	Pheromone-regulated multispanning membrane protein	vacuole
YER075C	PTP3	0.261686	Phosphotyrosine-specific protein phosphatase	cytoplasm
YGR205W	YGR205W	0.261591	ATP-binding protein of unknown function	cytoplasm,nucleus
YHL050C	YHL050C	0.261236	Putative protein of unknown function	N/A
YJL218W	YJL218W	0.260509	Mitochondrial protein, putative acetyltransferase	N/A
YCR069W	CPR4	0.260341	Peptidyl-prolyl cis-trans isomerase (cyclophilin)	vacuole
YKL164C	PIR1	0.259837	O-glycosylated protein required for cell wall stability	cytoplasm,nucleus
YBR234C	ARC40	0.25884	Subunit of the ARP2/3 complex	actin
YLL027W	ISA1	0.258639	Protein required for maturation of mitochondrial [4Fe-4S] proteins	mitochondrion
YNL328C	MDJ2	0.25849	Constituent of the mitochondrial import motor	mitochondrion
YDR092W	UBC13	0.258448	E2 ubiquitin-conjugating enzyme	cytoplasm
YOL119C	MCH4	0.258331	Protein with similarity to mammalian monocarboxylate permeases	N/A
YOL078W	AVO1	0.258243	Component of a membrane-bound complex containing the Tor2p kinase	N/A
YDR538W	PAD1	0.258153	Phenylacrylic acid decarboxylase	mitochondrion
YHR186C	KOG1	0.257767	Subunit of TORC1	vacuolar membrane
YDR148C	KGD2	0.257049	Dihydrolipoyl transsuccinylase	mitochondrion
YGL083W	SCY1	0.256675	Putative kinase	Golgi to vacuole
YKL168C	KKQ8	0.256334	Putative serine/threonine protein kinase with unknown cellular role	cytoplasm
YNL239W	LAP3	0.256301	Cysteine aminopeptidase with homocysteine-thiolactonase activity	cytoplasm,mitochondrion
YMR199W	CLN1	0.256083	G1 cyclin involved in regulation of the cell cycle	cytoplasm,nucleus
YBR128C	ATG14	0.255588	Autophagy-specific subunit of phosphatidylinositol 3-kinase complex I	N/A
YFR021W	ATG18	0.255535	Phosphoinositide binding protein	ambiguous
YMR063W	RIM9	0.25535	Plasma membrane protein of unknown function	N/A
YNR012W	URK1	0.254396	Uridine/cytidine kinase	cytoplasm,nucleus
YOR065W	CYT1	0.253877	Cytochrome c1	mitochondrion
YBR037C	SCO1	0.253799	Copper-binding protein of mitochondrial inner membrane	mitochondrion
YNL131W	TOM22	0.253576	Component of the TOM (Translocase of Outer Membrane) complex	ambiguous
YFL068W	YFL068W	0.253534	Putative protein of unknown function	N/A
YJR118C	ILM1	0.252308	Protein of unknown function	ER
YOL148C	SPT20	0.251823	Subunit of the SAGA transcriptional regulatory complex	nucleus
YOL012C	HTZ1	0.251792	Histone variant H2AZ	nucleus
YAL042W	ERV46	0.251587	Protein localized to COPII-coated vesicles	N/A
YJR095W	SFC1	0.251269	Mitochondrial succinate-fumarate transporter	N/A
YDL211C	YDL211C	0.251257	Protein of unknown function	vacuole
YDR486C	VPS60	0.251257	Protein involved in late endosome to vacuole transport	vacuolar membrane
YEL065W	SIT1	0.250909	Ferrioxamine B transporter	vacuole
YDR530C	APA2	0.250615	Diadenosine 5',5'''-P1,P4-tetraphosphate phosphorylase II	cytoplasm,nucleus
YER169W	RPH1	0.250504	JmjC domain-containing histone demethylase	nucleus
YPL100W	ATG21	0.250184	Phosphoinositide binding protein	ambiguous,endosome
YNL192W	CHS1	0.250085	Chitin synthase I	N/A
YDL124W	YDL124W	0.249108	NADPH-dependent alpha-keto amide reductase	cytoplasm,nucleus
YDL036C	YDL036C	0.248593	Mitochondrial tRNA:pseudouridine synthase	cytoplasm,nucleus
YPR028W	YOP1	0.247878	Reticulon-interacting protein	ER
YGL037C	PNC1	0.247875	Nicotinamidase that converts nicotinamide to nicotinic acid	peroxisome
YIL053W	RHR2	0.247705	Constitutively expressed DL-glycerol-3-phosphate phosphatase	ambiguous,cytoplasm,nucleus
YLR264W	RPS28B	0.247053	Protein component of the small (40S) ribosomal subunit	cytoplasm
YER101C	AST2	0.246359	Lipid raft associated protein	cytoplasm
YJR156C	THI11	0.245629	Protein involved in synthesis of the thiamine precursor HMP	N/A
YOR113W	AZF1	0.245257	Zinc-finger transcription factor	nucleus
YDR518W	EUG1	0.244305	Protein disulfide isomerase of the endoplasmic reticulum lumen	N/A
YBR142W	MAK5	0.243703	Essential nucleolar protein	nucleolus,nucleus
YEL060C	PRB1	0.24359	Vacuolar proteinase B (yscB) with H3 N-terminal endopeptidase activity	cytoplasm,punctate composite
YBR170C	NPL4	0.242783	Substrate-recruiting cofactor of the Cdc48p-Npl4p-Ufd1p segregase	cytoplasm,nucleus
YIL005W	EPS1	0.242509	ER protein with chaperone and co-chaperone activity	vacuole
YER130C	YER130C	0.241295	Transcription factor that binds IME1 Upstream Activation Signal (UAS)	N/A
YPL043W	NOP4	0.241064	Nucleolar protein	nucleolus,nucleus
YJL081C	ARP4	0.239081	Nuclear actin-related protein involved in chromatin remodeling	nucleus
YOR046C	DBP5	0.238615	Cytoplasmic ATP-dependent RNA helicase of the DEAD-box family	nuclear periphery
YJL094C	KHA1	0.238584	Putative K+/H+ antiporter	N/A
YDL240W	LRG1	0.23832	GTPase-activating protein (GAP)	bud neck,cytoplasm,cell periphery
YCR054C	CTR86	0.238257	Essential protein of unknown function	cytoplasm
YCR065W	HCM1	0.237159	Forkhead transcription factor	cytoplasm,nucleus
YBR002C	RER2	0.237097	Forms the dehydrodolichyl diphosphate synthase (DDS) complex with NUS1	ER
YBR301W	DAN3	0.237059	Cell wall mannoprotein	N/A
YGR248W	SOL4	0.236823	6-phosphogluconolactonase	cytoplasm,nucleus
YOL004W	SIN3	0.236317	Component of both the Rpd3S and Rpd3L histone deacetylase complexes	mitochondrion
YBR028C	YBR028C	0.2363	AGC kinase	cytoplasm
YLL019C	KNS1	0.235446	Protein kinase involved in negative regulation of PolIII transcription	N/A
YLR119W	SRN2	0.235225	Component of the ESCRT-I complex	N/A
YFR002W	NIC96	0.235045	Linker nucleoporin component of the nuclear pore complex (NPC)	nuclear periphery
YGL160W	YGL160W	0.234494	NADPH oxidase localized to the perinuclear ER	N/A
YLR464W	YLR464W	0.232367	Putative protein of unknown function	N/A
YLR237W	THI7	0.231697	Plasma membrane transporter responsible for the uptake of thiamine	cell periphery,vacuole
YLR130C	ZRT2	0.231693	Low-affinity zinc transporter of the plasma membrane	ER
YAL053W	YAL053W	0.231232	Putative calcium channel involved in calcium release under hypotonic	ambiguous,bud neck,cell periphery,punctate composite,Golgi to vacuole,bud
YMR269W	YMR269W	0.230962	Nucleolar protein implicated in ribosome biogenesis	nucleolus
YIL057C	YIL057C	0.230058	Protein of unknown function	cytoplasm
YIL125W	KGD1	0.229665	Subunit of the mitochondrial alpha-ketoglutarate dehydrogenase complex	mitochondrion
YJR074W	MOG1	0.229655	Conserved nuclear protein that interacts with GTP-Gsp1p	cytoplasm
YMR213W	CEF1	0.229269	Essential splicing factor	cytoplasm,nucleus
YGR150C	YGR150C	0.228909	Mitochondrial 15S rRNA-binding protein	mitochondrion
YMR246W	FAA4	0.228639	Long chain fatty acyl-CoA synthetase	lipid particle
YGR038W	ORM1	0.228167	Protein that mediates sphingolipid homeostasis	ER
YPR021C	AGC1	0.228123	Mitochondrial amino acid transporter	N/A
YDL207W	GLE1	0.227102	Cytoplasmic nucleoporin required for polyadenylated mRNA export	nuclear periphery
YGL014W	PUF4	0.226961	Member of the PUF protein family	cytoplasm
YDR423C	CAD1	0.226228	AP-1-like basic leucine zipper (bZIP) transcriptional activator	cytoplasm,nucleus
YBR019C	GAL10	0.226205	UDP-glucose-4-epimerase	N/A
YGR162W	TIF4631	0.225277	Translation initiation factor eIF4G and scaffold protein	cytoplasm
YER008C	SEC3	0.224908	Subunit of the exocyst complex	bud neck,cell periphery,bud
YGL022W	STT3	0.223595	Catalytic subunit of the oligosaccharyltransferase complex of the ER l	ER
YGR053C	YGR053C	0.223249	Putative protein of unknown function	N/A
YDR414C	ERD1	0.222916	Predicted membrane protein required for lumenal ER protein retention	ambiguous
YBR085W	AAC3	0.222439	Mitochondrial inner membrane ADP/ATP translocator	mitochondrion
YML115C	VAN1	0.222174	Component of the mannan polymerase I	vacuole,Golgi
YIR014W	YIR014W	0.221659	Component of Dsc E3 ligase complex in vacuolar membranes	vacuole
YHR108W	GGA2	0.22113	Protein that regulates Arf1p, Arf2p to facilitate Golgi trafficking	Golgi to vacuole
YML064C	TEM1	0.219701	GTPase involved in initiation of Mitotic Exit Network (MEN)	punctate composite,spindle pole
YMR119W	ASI1	0.219344	Subunit of the inner nuclear membrane Asi ubiquitin ligase complex	nuclear periphery
YBR296C-A	YBR296C-A	0.219042	Inhibitor of the Anaphase-Promoting Complex/Cyclosome (APC/C)	N/A
YER012W	PRE1	0.21805	Beta 4 subunit of the 20S proteasome	N/A
YAL067W-A	YAL067W-A	0.217604	Putative protein of unknown function	N/A
YNL250W	RAD50	0.214113	Subunit of MRX complex with Mre11p and Xrs2p	cytoplasm,nucleus
YBL093C	ROX3	0.213989	Subunit of the RNA polymerase II mediator complex	nucleus
YGR035W-A	YGR035W-A	0.213789	Putative protein of unknown function	N/A
YBR263W	SHM1	0.213768	Mitochondrial serine hydroxymethyltransferase	mitochondrion
YLR387C	YLR387C	0.212963	Cytoplasmic 60S subunit biogenesis factor	cytoplasm
YDR321W	ASP1	0.212922	Cytosolic L-asparaginase, involved in asparagine catabolism	N/A
YDR158W	HOM2	0.211665	Aspartic beta semi-aldehyde dehydrogenase	cytoplasm,nucleus
YGR208W	SER2	0.211234	Phosphoserine phosphatase of the phosphoglycerate pathway	cytoplasm,nucleus
YDR300C	PRO1	0.210811	Gamma-glutamyl kinase	cytoplasm
YML091C	RPM2	0.210519	Protein subunit of mitochondrial RNase P	mitochondrion
YEL052W	AFG1	0.210139	Protein that may act as a chaperone for cytochrome c oxidase subunits	mitochondrion
YIL105C	LIT2	0.209857	Phosphoinositide PI4,5P(2) binding protein, forms a complex with Slm2p	punctate composite
YBR007C	YBR007C	0.208944	Deletion suppressor of mpt5 mutation	ambiguous
YJR010C-A	SPC1	0.207882	Subunit of the signal peptidase complex (SPC)	ER
YMR038C	LYS7	0.207793	Copper chaperone for superoxide dismutase Sod1p	cytoplasm,nucleus
YHR082C	KSP1	0.207714	Serine/threonine protein kinase	cytoplasm
YDR385W	EFT2	0.207562	Elongation factor 2 (EF-2), also encoded by EFT1	cytoplasm
YBR003W	COQ1	0.206895	Hexaprenyl pyrophosphate synthetase	mitochondrion
YDR346C	SVF1	0.206863	Protein with a potential role in cell survival pathways	cytoplasm,nucleus
YPL060W	LPE10	0.20686	Mitochondrial inner membrane magnesium transporter	mitochondrion
YLR292C	SEC72	0.206764	Non-essential subunit of Sec63 complex	ER
YFL058W	THI5	0.206442	Protein involved in synthesis of the thiamine precursor HMP	N/A
YLR404W	YLR404W	0.206342	Seipin involved in lipid droplet (LD) assembly	ambiguous
YMR288W	HSH155	0.206254	U2-snRNP associated splicing factor	cytoplasm,nucleus
YJL141C	YAK1	0.206238	Serine-threonine protein kinase	N/A
YBL101C	ECM21	0.205357	Alpha-arrestin, ubiquitin ligase adaptor for Rsp5p	cytoplasm
YOR064C	YNG1	0.205078	Subunit of the NuA3 histone acetyltransferase complex	nucleus
YIL044C	AGE2	0.203799	ADP-ribosylation factor (ARF) GTPase activating protein (GAP) effector	Golgi to vacuole
YDR281C	PHM6	0.203155	Protein of unknown function	vacuole
YLR350W	ORM2	0.203099	Protein that mediates sphingolipid homeostasis	ER
YER100W	UBC6	0.201805	Ubiquitin-conjugating enzyme involved in ERAD	ER
YBL020W	RFT1	0.201585	Membrane protein required for translocation of Man5GlcNac2-PP-Dol	N/A
YGL190C	CDC55	0.201427	Regulatory subunit B of protein phosphatase 2A (PP2A)	cytoplasm
YBR220C	YBR220C	0.201292	Putative protein of unknown function	N/A
YBL037W	APL3	0.200814	Alpha-adaptin	bud neck,cell periphery
YIL046W-A	YIL046W-A	0.200565	Putative protein of unknown function	N/A
YGR191W	HIP1	0.20001	High-affinity histidine permease	ER,cell periphery,vacuole,bud
YBL046W	YBL046W	0.199208	Regulatory subunit of protein phosphatase PP4	nucleus
YAL067C	SEO1	0.198862	Putative permease	N/A
YGR090W	UTP22	0.198385	Component of the small-subunit processome	nucleolus,nucleus
YOR327C	SNC2	0.198152	Vesicle membrane receptor protein (v-SNARE)	vacuole
YIL064W	YIL064W	0.197823	Lysine methyltransferase	cytoplasm
YGR012W	YGR012W	0.196681	Putative cysteine synthase	mitochondrion
YCR079W	YCR079W	0.196619	Mitochondrial type 2C protein phosphatase (PP2C)	mitochondrion
YGR184C	UBR1	0.195708	E3 ubiquitin ligase (N-recognin)	N/A
YDL029W	ARP2	0.195427	Essential component of the Arp2/3 complex	punctate composite
YNL016W	PUB1	0.194982	Poly (A)+ RNA-binding protein	cytoplasm
YPL189W	GUP2	0.194909	Probable membrane protein	N/A
YLR308W	CDA2	0.194867	Chitin deacetylase	N/A
YPR073C	LTP1	0.193893	Protein phosphotyrosine phosphatase of unknown cellular role	cytoplasm,nucleus
YOL136C	PFK27	0.193542	6-phosphofructo-2-kinase	cytoplasm,nucleus
YPR138C	MEP3	0.191951	Ammonium permease of high capacity and low affinity	cell periphery
YNL186W	UBP10	0.191736	Ubiquitin-specific protease, deubiquitinates Ub-protein moieties	cytoplasm,nucleus
YPL172C	COX10	0.191605	Heme A:farnesyltransferase	mitochondrion
YDL131W	LYS21	0.190758	Homocitrate synthase isozyme	nucleus
YML097C	VPS9	0.190702	Guanine nucleotide exchange factor (GEF) and ubiquitin receptor	cytoplasm
YLR077W	FMP25	0.189726	Protein required for assembly of respiratory complex III	N/A
YDR376W	ARH1	0.189339	Oxidoreductase of the mitochondrial inner membrane	mitochondrion
YCR020W-B	HTL1	0.189254	Component of the RSC chromatin remodeling complex	nucleus
YNL093W	YPT53	0.188784	Stress-induced Rab family GTPase	N/A
YOL122C	SMF1	0.188383	Divalent metal ion transporter	N/A
YLR440C	SEC39	0.188232	Component of the Dsl1p tethering complex	ER
YDR523C	SPS1	0.18791	STE20-family GCKIII protein kinase	cytoplasm,nucleus
YNL331C	AAD14	0.187529	Putative aryl-alcohol dehydrogenase	N/A
YDR153C	ENT5	0.187493	Protein containing an N-terminal epsin-like domain	Golgi to vacuole
YDR160W	SSY1	0.187253	Component of the SPS plasma membrane amino acid sensor system	N/A
YLR363W-A	YLR363W-A	0.187113	Protein of unknown function	nucleus
YPL064C	CWC27	0.186923	Component of a complex containing Cef1p	cytoplasm,nucleus
YFR008W	FAR7	0.186727	Protein involved in recovery from pheromone-induced cell cycle arrest	ambiguous
YMR285C	NGL2	0.186401	Protein involved in 5.8S rRNA processing	cytoplasm
YLR025W	SNF7	0.186285	One of four subunits of the ESCRT-III complex	endosome
YLL026W	HSP104	0.186212	Disaggregase	cytoplasm
YFR026C	YFR026C	0.186017	Protein of unknown function	N/A
YMR218C	TRS130	0.185817	Component of transport protein particle (TRAPP) complex II	Golgi to vacuole
YJL059W	YHC3	0.185554	Protein required for the ATP-dependent transport of arginine	N/A
YNL227C	JJJ1	0.185142	Co-chaperone that stimulates the ATPase activity of Ssa1p	cytoplasm
YDR481C	PHO8	0.184863	Repressible vacuolar alkaline phosphatase	vacuole
YLR225C	YLR225C	0.184683	Putative protein of unknown function	cytoplasm
YHR116W	YHR116W	0.183999	Protein that functions in mitochondrial copper homeostasis	cytoplasm
YJR117W	STE24	0.182839	Highly conserved zinc metalloprotease	ER
YDR065W	YDR065W	0.182696	Protein of unknown function	mitochondrion
YAL048C	GON1	0.18254	Outer mitochondrial membrane GTPase, subunit of the ERMES complex	N/A
YDR322C-A	TIM11	0.182042	Subunit e of mitochondrial F1F0-ATPase	mitochondrion
YPL145C	KES1	0.182016	Sterol/phosphatidylinositol-4-phosphate (PI(4)P) exchanger	cytoplasm
YFR017C	YFR017C	0.181114	Cytoplasmic protein that inhibits Gdb1p glycogen debranching activity	cytoplasm
YER067W	YER067W	0.180574	Protein involved in energy metabolism under respiratory conditions	cytoplasm,nucleus
YDR402C	DIT2	0.180208	N-formyltyrosine oxidase	N/A
YDR459C	YDR459C	0.179799	Palmitoyltransferase with autoacylation activity	N/A
YGL169W	SUA5	0.179647	Protein involved in threonylcarbamoyl adenosine biosynthesis	cytoplasm
YER189W	YER189W	0.179568	Putative protein of unknown function	N/A
YKL154W	SRP102	0.179054	Signal recognition particle (SRP) receptor beta subunit	ER
YLR083C	EMP70	0.179054	Protein with a role in cellular adhesion and filamentous growth	vacuole
YPL047W	SGF11	0.179054	Integral subunit of SAGA histone acetyltransferase complex	nucleus
YHL022C	SPO11	0.178483	Putative type IIB topoisomerase involved in meiotic DSB-formation	N/A
YLR116W	MSL5	0.177168	Component of commitment complex	nucleus
YFL056C	AAD6	0.177104	Putative aryl-alcohol dehydrogenase	N/A
YDL107W	MSS2	0.176477	Peripherally bound inner membrane protein of the mitochondrial matrix	mitochondrion
YKL034W	TUL1	0.176153	Subunit of the DSC ubiquitin ligase complex	N/A
YLR160C	ASP3-4	0.176097	Cell-wall L-asparaginase II involved in asparagine catabolism	N/A
YGR067C	YGR067C	0.175721	Putative protein of unknown function	N/A
YBR202W	CDC47	0.174231	Component of the Mcm2-7 hexameric helicase complex	cytoplasm,nucleus
YIL145C	PAN6	0.174218	Pantothenate synthase	cytoplasm,nucleus
YAL044C	GCV3	0.174194	H subunit of the mitochondrial glycine decarboxylase complex	mitochondrion
YLR055C	SPT8	0.174109	Subunit of the SAGA transcriptional regulatory complex	nucleus
YPR049C	ATG11	0.171055	Adapter protein for pexophagy and the Cvt targeting pathway	punctate composite
YBR145W	ADH5	0.170799	Alcohol dehydrogenase isoenzyme V	cytoplasm,nucleus
YPL016W	SWI1	0.169815	Subunit of the SWI/SNF chromatin remodeling complex	nucleus
YFR014C	CMK1	0.169567	Calmodulin-dependent protein kinase	cytoplasm
YDR514C	YDR514C	0.169327	Protein of unknown function that localizes to mitochondria	mitochondrion,nucleus
YNL269W	BSC4	0.16932	Protein of unknown function	N/A
YGR277C	YGR277C	0.168933	Subunit of the CoA-Synthesizing Protein Complex (CoA-SPC)	cytoplasm
YHR072W	ERG7	0.168036	Lanosterol synthase	lipid particle
YGR147C	NAT2	0.167794	Protein of unknown function	mitochondrion
YDL164C	CDC9	0.167773	DNA ligase I found in nucleus and mitochondria	mitochondrion,nucleus
YOL055C	THI20	0.167667	Trifunctional enzyme of thiamine biosynthesis, degradation and salvage	ambiguous
YGR109C	CLB6	0.167132	B-type cyclin involved in DNA replication during S phase	N/A
YDR075W	PPH3	0.167005	Catalytic subunit of protein phosphatase PP4 complex	cytoplasm,nucleus
YJL212C	OPT1	0.166935	Proton-coupled oligopeptide transporter of the plasma membrane	ER
YLR380W	CSR1	0.166571	Phosphatidylinositol transfer protein	ambiguous
YPL116W	HOS3	0.166487	Trichostatin A-insensitive homodimeric histone deacetylase (HDAC)	bud neck
YFL050C	ALR2	0.166374	Probable Mg(2+) transporter	N/A
YHL015W-A	YHL015W-A	0.166343	Putative protein of unknown function	N/A
YOR189W	IES4	0.16627	Component of the INO80 chromatiin remodeling complex	nucleus
YLR017W	MEU1	0.165807	Methylthioadenosine phosphorylase (MTAP)	cytoplasm,nucleus
YHR007C-A	YHR007C-A	0.165738	Putative protein of unknown function	N/A
YHR111W	UBA4	0.165276	E1-like protein that activates Urm1p before urmylation	cytoplasm
YDR276C	PMP3	0.165149	Small plasma membrane protein	ambiguous
YGL210W	YPT32	0.164825	Rab family GTPase involved in the exocytic pathway	cytoplasm,nucleus
YGL108C	YGL108C	0.164639	Protein of unknown function, predicted to be palmitoylated	cell periphery
YLR187W	YLR187W	0.164506	Protein of unknown function	ambiguous,bud neck,cytoplasm,cell periphery,bud
YNL183C	NPR1	0.164483	Protein kinase	cytoplasm
YLR417W	VPS36	0.164249	Component of the ESCRT-II complex	cytoplasm
YGR197C	SNG1	0.164183	Protein involved in resistance to nitrosoguanidine and 6-azauracil	N/A
YLR395C	COX8	0.164146	Subunit VIII of cytochrome c oxidase (Complex IV)	mitochondrion
YAL027W	YAL027W	0.163702	5'- and 3'-flap DNA binding protein	nucleus
YCR010C	ADY2	0.162801	Acetate transporter required for normal sporulation	N/A
YAL051W	OAF1	0.16227	Oleate-activated transcription factor	N/A
YKR046C	PET10	0.162075	Perilipin, involved in formation and stability of lipid droplets	lipid particle
YNR070W	YNR070W	0.162011	Putative transporter of the ATP-binding cassette (ABC) family	N/A
YDR466W	PKH3	0.161624	Protein kinase with similarity to mammalian PDK1 and yeast Pkh1p/Phk2p	N/A
YGR256W	GND2	0.16059	6-phosphogluconate dehydrogenase (decarboxylating)	ambiguous
YLR367W	RPS22B	0.160577	Protein component of the small (40S) ribosomal subunit	nucleolus
YDR436W	PPZ2	0.160375	Serine/threonine protein phosphatase Z, isoform of Ppz1p	ambiguous
YHR096C	HXT5	0.159911	Hexose transporter with moderate affinity for glucose	N/A
YOR266W	PNT1	0.159814	Mitochondrial integral inner membrane protein	mitochondrion
YNR017W	MAS6	0.159605	Essential component of the TIM23 complex	mitochondrion
YAL047C	SPC72	0.159599	Gamma-tubulin small complex (gamma-TuSC) receptor	spindle pole
YNL029C	KTR5	0.15943	Putative mannosyltransferase involved in protein glycosylation	N/A
YGL005C	COG7	0.159358	Component of the conserved oligomeric Golgi complex	Golgi
YHR120W	MSH1	0.158638	DNA-binding protein of the mitochondria	mitochondrion
YBR250W	YBR250W	0.157679	Protein of unknown function	N/A
YDR059C	UBC5	0.157349	Ubiquitin-conjugating enzyme	cytoplasm,nucleus
YHR199C	FMP34	0.156173	Protein of unknown function	mitochondrion
YDL004W	ATP16	0.155824	Delta subunit of the central stalk of mitochondrial F1F0 ATP synthase	N/A
YJR139C	HOM6	0.155514	Homoserine dehydrogenase (L-homoserine:NADP oxidoreductase)	cytoplasm,nucleus
YGL167C	PMR1	0.155435	High affinity Ca2+/Mn2+ P-type ATPase	ER
YDR111C	ALT2	0.155246	Catalytically inactive alanine transaminase	cytoplasm,nucleus
YER186C	YER186C	0.154814	Putative protein of unknown function	N/A
YMR277W	FCP1	0.154654	Carboxy-terminal domain (CTD) phosphatase	nucleus
YGL104C	VPS73	0.154533	Mitochondrial protein	N/A
YAR020C	PAU7	0.154496	Member of the seripauperin multigene family	N/A
YDR256C	CTA1	0.154136	Catalase A	N/A
YDR387C	YDR387C	0.153454	Putative transporter	N/A
YCL001W-A	YCL001W-A	0.153438	Putative protein of unknown function	N/A
YPR124W	CTR1	0.152954	High-affinity copper transporter of plasma membrane	cell periphery,bud
YIL177C	YIL177C	0.152862	Putative Y' element ATP-dependent helicase	N/A
YML106W	URA5	0.152817	Major orotate phosphoribosyltransferase (OPRTase) isozyme	cytoplasm,nucleus
YHR055C	CUP1-2	0.15201	Metallothionein	cytoplasm,nucleus
YHR158C	KEL1	0.15148	Protein required for proper cell fusion and cell morphology	ambiguous,bud neck,cell periphery,bud
YCR036W	RBK1	0.151275	Ribokinase, phosphorylates ribose to ribose‚Äê5‚Äêphosphate	cytoplasm,nucleus
YPL008W	CHL1	0.151137	Probable DNA helicase	cytoplasm,nucleus
YBR255C-A	YBR255C-A	0.150684	Mitochondrial inner membrane protein	N/A
YDR450W	RPS18A	0.150227	Protein component of the small (40S) ribosomal subunit	cytoplasm
YKL218C	YKL218C	0.150075	3-hydroxyaspartate dehydratase	N/A
YML026C	RPS18B	0.149569	Protein component of the small (40S) ribosomal subunit	cytoplasm
YLR068W	FYV7	0.149355	Nucleolar protein required for maturation of 18S rRNA	nucleolus,nucleus
YMR101C	SRT1	0.149261	Forms the dehydrodolichyl diphosphate synthase (DDS) complex with NUS1	N/A
YNL247W	YNL247W	0.149223	Cysteinyl-tRNA synthetase	cytoplasm
YDR292C	SRP101	0.148649	Signal recognition particle (SRP) receptor alpha subunit	N/A
YBR165W	UBS1	0.147968	Ubiquitin-conjugating enzyme suppressor that regulates Cdc34p	N/A
YFL036W	RPO41	0.147968	Mitochondrial RNA polymerase	punctate composite
YGR106C	YGR106C	0.147968	ER protein that functions in assembly of the V0 sector of V-ATPase	vacuolar membrane
YJR024C	YJR024C	0.147968	5'-methylthioribulose-1-phosphate dehydratase	cytoplasm
YOR340C	RPA43	0.147968	RNA polymerase I subunit A43	nucleolus
YML050W	YML050W	0.14741	Protein of unknown function	N/A
YDR379C-A	YDR379C-A	0.147206	Mitochondrial protein involved in assembly of succinate dehydrogenase	mitochondrion
YLR009W	RLP24	0.147195	Essential protein required for ribosomal large subunit biogenesis	N/A
YLR346C	YLR346C	0.147191	Protein of unknown function found in mitochondria	mitochondrion
YOR025W	HST3	0.147149	Member of the Sir2 family of NAD(+)-dependent protein deacetylases	nucleus
YNL059C	ARP5	0.147121	Nuclear actin-related protein involved in chromatin remodeling	cytoplasm,nucleus
YER126C	NSA2	0.146591	Protein constituent of 66S pre-ribosomal particles	cytoplasm
YBL031W	SHE1	0.146559	Mitotic spindle protein	microtubule
YHR084W	STE12	0.146553	Transcription factor that is activated by a MAPK signaling cascade	nucleus
YPR009W	SUT2	0.146422	Zn2Cys6 family transcription factor	N/A
YLR300W	EXG1	0.146294	Major exo-1,3-beta-glucanase of the cell wall	vacuole
YIR022W	SEC11	0.145972	18kDa catalytic subunit of the Signal Peptidase Complex (SPC)	ER
YBR238C	YBR238C	0.145826	Mitochondrial membrane protein	cytoplasm,mitochondrion
YOL002C	YOL002C	0.145826	Plasma membrane receptor for plant antifungal osmotin	N/A
YJR137C	ECM17	0.145736	Sulfite reductase beta subunit	cytoplasm
YDR047W	HEM12	0.145526	Uroporphyrinogen decarboxylase	cytoplasm,nucleus
YLR226W	BUR2	0.145243	Cyclin for the Sgv1p (Bur1p) protein kinase	nucleus
YLR170C	APS1	0.144567	Small subunit of the clathrin-associated adaptor complex AP-1	N/A
YER118C	SHO1	0.144403	Transmembrane osmosensor for filamentous growth and HOG pathways	bud neck,cytoplasm,cell periphery
YER054C	GIP2	0.144286	Putative regulatory subunit of protein phosphatase Glc7p	cytoplasm,punctate composite
YLR253W	YLR253W	0.144263	Mitochondrial protein of unknown function involved in lipid homeostas	mitochondrion
YFL067W	YFL067W	0.143568	Protein of unknown function	N/A
YMR166C	YMR166C	0.143546	Transporter of the mitochondrial inner membrane that exports magnesium	mitochondrion
YNL249C	MPA43	0.143503	Protein of unknown function	N/A
YGR226C	YGR226C	0.143458	Dubious open reading frame	N/A
YMR220W	ERG8	0.142657	Phosphomevalonate kinase	cytoplasm,nucleus
YOR185C	GSP2	0.1418	GTP binding protein (mammalian Ranp homolog)	cytoplasm,nucleus
YBL113C	YBL113C	0.141779	Helicase-like protein encoded within the telomeric Y' element	N/A
YFL002C	SPB4	0.141636	Putative ATP-dependent RNA helicase	nucleolus,nucleus
YDR427W	RPN9	0.141555	Non-ATPase regulatory subunit of the 26S proteasome	nucleus
YDR081C	PDC2	0.140888	Transcription factor for thiamine-regulated genes	nucleus
YJL101C	GSH1	0.140321	Gamma glutamylcysteine synthetase	cytoplasm
YJL054W	TIM54	0.140216	Component of the mitochondrial TIM22 complex	mitochondrion
YJL190C	RPS22A	0.140081	Protein component of the small (40S) ribosomal subunit	nucleolus,nucleus
YPR016C	TIF6	0.140052	Constituent of 66S pre-ribosomal particles	nucleolus,nucleus
YEL062W	NPR2	0.139197	Subunit of the Iml1p/SEACIT complex	ambiguous
YDR174W	HMO1	0.139074	Chromatin associated high mobility group (HMG) family member	nucleolus
YDR122W	KIN1	0.138697	S/T protein kinase	cytoplasm
YMR175W	SIP18	0.138615	Phospholipid-binding hydrophilin	cytoplasm
YJL203W	PRP21	0.138316	Subunit of the SF3a splicing factor complex	nucleus
YDL037C	BSC1	0.136709	Protein of unconfirmed function	N/A
YMR062C	ECM40	0.136535	Mitochondrial ornithine acetyltransferase	mitochondrion
YOR163W	DDP1	0.136181	Polyphosphate phosphatase	cytoplasm,nucleus
YOL152W	FRE7	0.136026	Putative ferric reductase with similarity to Fre2p	N/A
YPL259C	APM1	0.135994	Mu1-like medium subunit of the AP-1 complex	Golgi to vacuole
YHR195W	NVJ1	0.135758	Nuclear envelope protein	nucleus,spindle pole
YJR006W	HYS2	0.135723	Subunit of DNA polymerase delta (polymerase III)	nucleus
YDL226C	GCS1	0.135588	ADP-ribosylation factor GTPase activating protein (ARF GAP)	cytoplasm
YAL063C-A	YAL063C-A	0.135123	Putative protein of unknown function	N/A
YIL040W	APQ12	0.135	Nuclear envelope/ER integral membrane protein	ER
YGR295C	COS6	0.134418	Endosomal protein involved in turnover of plasma membrane proteins	vacuole
YNR056C	BIO5	0.133842	Putative transmembrane protein involved in the biotin biosynthesis	cell periphery
YLR128W	YLR128W	0.133676	Scaffold-type E3 ligase	N/A
YDR284C	DPP1	0.133621	Diacylglycerol pyrophosphate (DGPP) phosphatase	vacuolar membrane
YJL131C	YJL131C	0.133532	Mitochondrial translation initiation factor 3 (IF3, mIF3)	mitochondrion
YML101C	CUE4	0.133479	Protein of unknown function	ER
YHL008C	YHL008C	0.133424	Putative protein of unknown function	vacuole
YMR067C	UBX4	0.133156	UBX domain-containing protein that interacts with Cdc48p	cytoplasm,nucleus
YGR026W	YGR026W	0.132502	Putative protein of unknown function	cell periphery
YJL042W	MHP1	0.132091	Microtubule-associated protein involved in microtubule organization	cytoplasm
YJL033W	HCA4	0.131894	DEAD box RNA helicase	nucleolus
YBR053C	YBR053C	0.131617	Putative protein of unknown function	N/A
YPL070W	MUK1	0.131454	Guanine nucleotide exchange factor (GEF)	cytoplasm
YKL021C	MAK11	0.130757	Protein involved in an early step of 60S ribosomal subunit biogenesis	nucleolus,nucleus
YCL029C	BIK1	0.130426	Microtubule-associated protein	spindle pole,microtubule
YML022W	APT1	0.130211	Adenine phosphoribosyltransferase	cytoplasm,nucleus
YKL026C	GPX1	0.129517	Phospholipid hydroperoxide glutathione peroxidase	ambiguous
YML056C	IMD4	0.129426	Inosine monophosphate dehydrogenase	cytoplasm
YLR259C	HSP60	0.12841	Tetradecameric mitochondrial chaperonin	mitochondrion
YLR383W	RHC18	0.127854	Subunit of the SMC5-SMC6 complex	cytoplasm,nucleus
YGR287C	YGR287C	0.127773	Major isomaltase (alpha-1,6-glucosidase/alpha-methylglucosidase)	N/A
YNR039C	ZRG17	0.127482	Endoplasmic reticulum zinc transporter	ER
YBR047W	FMP23	0.127122	Putative protein of unknown function	mitochondrion
YLR370C	ARC18	0.126998	Subunit of the ARP2/3 complex	actin
YKL010C	UFD4	0.126311	Ubiquitin-protein ligase (E3)	cytoplasm,nucleus
YDL065C	PEX19	0.126026	Chaperone and import receptor for newly-synthesized class I PMPs	cytoplasm
YPL152W	RRD2	0.125521	Peptidyl-prolyl cis/trans-isomerase	cytoplasm
YER055C	HIS1	0.125281	ATP phosphoribosyltransferase	N/A
YHL034C	SBP1	0.124975	Protein that binds eIF4G and has a role in repression of translation	cytoplasm
YFL028C	CAF16	0.124846	Part of evolutionarily-conserved CCR4-NOT regulatory complex	cytoplasm,nucleus
YLR244C	MAP1	0.124689	Methionine aminopeptidase	cytoplasm,nucleus
YJR005W	APL1	0.124261	Beta-adaptin	bud neck,cell periphery
YFL040W	YFL040W	0.124247	Putative transporter	N/A
YBR193C	MED8	0.124186	Subunit of the RNA polymerase II mediator complex	ambiguous
YDL236W	PHO13	0.123911	Conserved phosphatase acting as a metabolite repair enzyme	cytoplasm,nucleus
YGR175C	ERG1	0.123879	Squalene epoxidase	ER
YAL064W	YAL064W	0.12377	Protein of unknown function	N/A
YLR219W	MSC3	0.123693	Protein of unknown function	cell periphery
YGL059W	YGL059W	0.123598	Mitochondrial protein kinase	mitochondrion
YBL008W-A	YBL008W-A	0.123518	Putative protein of unknown function	N/A
YPL003W	ULA1	0.1235	Protein that activates Rub1p (NEDD8) before neddylation	N/A
YJL133W	MRS3	0.123389	Iron transporter, mediates Fe2+ transport across inner mito membrane	mitochondrion
YDR033W	MRH1	0.122603	Protein that localizes primarily to the plasma membrane	cell periphery,bud
YJR155W	AAD10	0.122419	Putative aryl-alcohol dehydrogenase	N/A
YDL054C	MCH1	0.12221	Protein with similarity to mammalian monocarboxylate permeases	vacuolar membrane
YCR031C	RPS14A	0.122139	Protein component of the small (40S) ribosomal subunit	N/A
YHR030C	SLT2	0.121336	Serine/threonine MAP kinase	cytoplasm,nucleus
YEL003W	GIM4	0.121275	Subunit of the heterohexameric cochaperone prefoldin complex	cytoplasm
YIL144W	TID3	0.121108	Component of the kinetochore-associated Ndc80 complex	spindle pole
YMR055C	BUB2	0.121018	Mitotic exit network regulator	spindle pole
YCR034W	FEN1	0.120445	Fatty acid elongase, involved in sphingolipid biosynthesis	ER
YGR086C	PIL1	0.120267	Eisosome core component	punctate composite
YBL106C	SRO77	0.120008	Protein with roles in exocytosis and cation homeostasis	N/A
YDL127W	PCL2	0.119784	Cyclin, interacts with cyclin-dependent kinase Pho85p	N/A
YHR101C	BIG1	0.1196	Integral membrane protein of the endoplasmic reticulum	ER
YDR446W	ECM11	0.119199	Meiosis-specific protein	N/A
YHR178W	STB5	0.118736	Transcription factor	cytoplasm,nucleus
YDR234W	LYS4	0.116912	Homoaconitase	mitochondrion
YBR248C	HIS7	0.116736	Imidazole glycerol phosphate synthase	cytoplasm,nucleus
YDR237W	MRPL7	0.11648	Mitochondrial ribosomal protein of the large subunit	N/A
YNL004W	HRB1	0.115802	Poly(A+) RNA-binding protein	nucleus
YOL128C	YGK3	0.115778	Protein kinase related to mammalian GSK-3 glycogen synthase kinases	N/A
YKL157W	APE2	0.1156	Aminopeptidase yscII	cytoplasm,mitochondrion
YOL101C	YOL101C	0.115506	Membrane protein involved in zinc ion homeostasis	ER
YGL262W	YGL262W	0.114732	Putative protein of unknown function	N/A
YOL130W	ALR1	0.114376	Plasma membrane Mg(2+) transporter	ambiguous
YDR287W	YDR287W	0.114189	Inositol monophosphatase	N/A
YMR093W	UTP15	0.113984	Nucleolar protein	nucleolus,nucleus
YOR254C	SEC63	0.11317	Essential subunit of Sec63 complex	ER
YIL037C	PRM2	0.112613	Pheromone-regulated protein	vacuole
YMR179W	SPT21	0.112076	Protein with a role in transcriptional silencing	nucleus
YAR027W	UIP3	0.111872	Putative integral membrane protein of unknown function	ambiguous
YFL030W	AGX1	0.111824	Alanine:glyoxylate aminotransferase (AGT)	0
YIL018W	RPL2B	0.111153	Ribosomal 60S subunit protein L2B	N/A
YNL234W	YNL234W	0.111037	Protein of unknown function with similarity to globins	cytoplasm
YNL159C	ASI2	0.110823	Subunit of the inner nuclear membrane Asi ubiquitin ligase complex	N/A
YDR409W	SIZ1	0.110637	SUMO E3 ligase	cytoplasm,nucleus
YHR154W	RTT107	0.110538	Protein implicated in Mms22-dependent DNA repair during S phase	nucleus
YKL150W	MCR1	0.1105	Mitochondrial NADH-cytochrome b5 reductase	mitochondrion
YHL029C	YHL029C	0.110458	Cytoplasmic protein required for replication of Brome mosaic virus	cytoplasm
YJL209W	CBP1	0.110118	Mitochondrial protein, regulator of COB mRNA stability and translation	mitochondrion
YDR461W	MFA1	0.110025	Mating pheromone a-factor	cytoplasm,nucleus
YDR351W	SBE2	0.109435	Protein required for bud growth	N/A
YPL169C	MEX67	0.109389	Poly(A)RNA binding protein involved in nuclear mRNA export	nuclear periphery
YER159C	BUR6	0.108955	Subunit of a heterodimeric NC2 transcription regulator complex	nucleus
YFR012W-A	YFR012W-A	0.108492	Putative protein of unknown function	N/A
YGL168W	HUR1	0.108439	Protein with a role in DNA repair	N/A
YPL209C	IPL1	0.108231	Aurora kinase of chromosomal passenger complex	microtubule
YDR109C	YDR109C	0.108151	D-ribulokinase	N/A
YMR065W	KAR5	0.108151	Protein required for nuclear membrane fusion during karyogamy	N/A
YGR216C	GPI1	0.108129	Membrane protein involved in the synthesis of GlcNAc-PI	N/A
YOR316C	COT1	0.108033	Vacuolar transporter that mediates zinc transport into the vacuole	vacuolar membrane
YNR013C	PHO91	0.107159	Low-affinity vacuolar phosphate transporter	ER
YER129W	PAK1	0.106874	Upstream serine/threonine kinase for the SNF1 complex	cytoplasm
YBL052C	SAS3	0.106521	Histone acetyltransferase catalytic subunit of NuA3 complex	nucleus
YMR015C	ERG5	0.105998	C-22 sterol desaturase	ER
YKR017C	YKR017C	0.105899	RING finger ubiquitin ligase (E3)	N/A
YHR004C	NEM1	0.105811	Probable catalytic subunit of Nem1p-Spo7p phosphatase holoenzyme	punctate composite
YLL051C	FRE6	0.105692	Putative ferric reductase with similarity to Fre2p	vacuole
YIL023C	YIL023C	0.105196	Zinc transporter	N/A
YDR304C	CPR5	0.105165	Peptidyl-prolyl cis-trans isomerase (cyclophilin) of the ER	vacuole
YER113C	YER113C	0.105048	Protein with a role in cellular adhesion and filamentous growth	Golgi,Golgi to ER
YIR028W	DAL4	0.104959	Allantoin permease	N/A
YGR223C	YGR223C	0.104458	Phosphatidylinositol 3,5-bisphosphate-binding protein	N/A
YJR114W	SRF2	0.10384	Dubious open reading frame	N/A
YER146W	LSM5	0.103711	Lsm (Like Sm) protein	N/A
YGR130C	YGR130C	0.103467	Component of the eisosome with unknown function	punctate composite
YHR155W	YHR155W	0.103467	Putative sterol transfer protein	mitochondrion
YPL212C	PUS1	0.103008	tRNA:pseudouridine synthase	nucleus
YDL067C	COX9	0.102618	Subunit VIIa of cytochrome c oxidase (Complex IV)	mitochondrion
YKL146W	AVT3	0.102494	Vacuolar transporter	ER
YER063W	THO1	0.102237	Conserved nuclear RNA-binding protein	nucleus
YOR174W	MED4	0.102151	Subunit of the RNA polymerase II mediator complex	nucleus
YOL137W	BSC6	0.101093	Protein of unknown function with 8 putative transmembrane segments	Golgi to ER,Golgi to vacuole
YFR001W	LOC1	0.100373	Nucleolar protein involved in the asymmetric localization of ASH1 mRNA	nucleolus,nucleus
YLL062C	MHT1	0.100354	S-methylmethionine-homocysteine methyltransferase	cytoplasm
YLR188W	MDL1	0.100104	Mitochondrial inner membrane half-type ABC transporter	mitochondrion
YNL142W	MEP2	0.0997141	Ammonium permease involved in regulation of pseudohyphal growth	cell periphery
YML032C	RAD52	0.0995162	Protein involved in homologous recombination	nucleus
YIR016W	YIR016W	0.0992	Putative protein of unknown function	N/A
YDR052C	DBF4	0.0989827	Regulatory subunit of Cdc7p-Dbf4p kinase complex	cytoplasm,nucleus
YDR513W	TTR1	0.0987764	Cytoplasmic glutaredoxin	nucleus
YPL002C	SNF8	0.0987376	Component of the ESCRT-II complex	ambiguous
YGR156W	PTI1	0.0985603	Essential component of CPF (cleavage and polyadenylation factor)	nucleus
YOR219C	STE13	0.0977061	Dipeptidyl aminopeptidase	N/A
YLR152C	YLR152C	0.097494	Putative protein of unknown function	N/A
YAL068C	YAL068C	0.0973285	Protein of unknown function	N/A
YKL053C-A	MDM35	0.0972001	Mitochondrial intermembrane space protein	cytoplasm,nucleus
YKR061W	KTR2	0.0965262	Mannosyltransferase involved in N-linked protein glycosylation	N/A
YHL036W	MUP3	0.0964289	Low affinity methionine permease	vacuole
YIL098C	FMC1	0.0962461	Mitochondrial matrix protein	mitochondrion
YGR244C	LSC2	0.0957756	Beta subunit of succinyl-CoA ligase	mitochondrion
YDL222C	FMP45	0.0947136	Integral membrane protein localized to mitochondria	punctate composite
YBR135W	CKS1	0.0946957	Cyclin-dependent protein kinase regulatory subunit and adaptor	cytoplasm,nucleus
YBL042C	FUI1	0.0943185	High affinity uridine permease, localizes to the plasma membrane	cell periphery,bud
YDL002C	NHP10	0.0939394	Non-essential INO80 chromatin remodeling complex subunit	nucleus
YPL038W	MET31	0.0937872	Zinc-finger DNA-binding transcription factor	cytoplasm,nucleus
YDL049C	KNH1	0.0932886	Protein with similarity to Kre9p	N/A
YPL030W	YPL030W	0.0932284	tRNA(Ser) Um(44) 2'-O-methyltransferase	cytoplasm
YKL176C	LST4	0.0927147	Subunit of the Lst4p-Lst7p GTPase activating protein complex for Gtr2p	ambiguous
YLL014W	YLL014W	0.0922753	Member of conserved ER transmembrane complex	ER
YDL195W	SEC31	0.0913874	Component of the Sec13p-Sec31p complex of the COPII vesicle coat	ER to Golgi
YGL195W	GCN1	0.0908385	Positive regulator of the Gcn2p kinase activity	cytoplasm
YIL029C	YIL029C	0.0901955	Protein involved in targeting mitochondrial membrane protein precursor	N/A
YHR044C	DOG1	0.0899233	2-deoxyglucose-6-phosphate phosphatase	N/A
YDL012C	YDL012C	0.0898889	Tail-anchored plasma membrane protein with a conserved CYSTM module	cell periphery
YDL055C	PSA1	0.0896117	GDP-mannose pyrophosphorylase (mannose-1-phosphate guanyltransferase)	cytoplasm
YAL059W	ECM1	0.0894682	Pre-ribosomal factor involved in 60S ribosomal protein subunit export	nucleus
YHL021C	FMP12	0.0887642	Protein of unknown function	mitochondrion
YDR496C	PUF6	0.0887374	Pumilio-homology domain protein	nucleolus,nucleus
YDR527W	RBA50	0.0885387	Protein involved in transcription	cytoplasm
YBR291C	CTP1	0.0877303	Mitochondrial inner membrane citrate transporter	mitochondrion
YPL036W	PMA2	0.0876838	Plasma membrane H+-ATPase	N/A
YMR081C	ISF1	0.0873862	Serine-rich, hydrophilic protein	N/A
YBR021W	FUR4	0.0862138	Plasma membrane localized uracil permease	N/A
YPR070W	MED1	0.0861073	Subunit of the RNA polymerase II mediator complex	nucleus
YGL020C	MDM39	0.085756	Subunit of the GET complex	ER
YIL083C	YIL083C	0.0851015	Phosphopantothenoylcysteine synthetase (PPCS)	cytoplasm,nucleus
YML071C	COG8	0.0843087	Component of the conserved oligomeric Golgi complex	punctate composite
YPL215W	CBP3	0.0841577	Mitochondrial protein required for assembly of cytochrome bc1 complex	mitochondrion
YHR126C	YHR126C	0.0837122	Putative GPI protein	N/A
YBL033C	RIB1	0.0827447	GTP cyclohydrolase II	cytoplasm,nucleus
YFL064C	YFL064C	0.0819577	Putative protein of unknown function	N/A
YPR132W	RPS23B	0.0819491	Ribosomal protein 28 (rp28) of the small (40S) ribosomal subunit	cytoplasm
YGL156W	AMS1	0.0819119	Vacuolar alpha mannosidase	punctate composite
YMR182C	RGM1	0.0815766	Putative zinc finger DNA binding transcription factor	nucleus
YDR091C	RLI1	0.0814304	Essential Fe-S protein	cytoplasm
YMR291W	YMR291W	0.0812447	Protein kinase of unknown cellular role	cytoplasm,nucleus
YJR062C	NTA1	0.0811203	Amidase	mitochondrion
YJR101W	RSM26	0.0808073	Mitochondrial ribosomal protein of the small subunit	mitochondrion
YJR092W	BUD4	0.0802849	Anillin-like protein involved in bud-site selection	bud neck
YGL128C	CWC23	0.0802559	Component of a complex containing Cef1p	cytoplasm,nucleus
YOR009W	TIR4	0.0796539	Cell wall mannoprotein	N/A
YIL076W	SEC28	0.0795892	Epsilon-COP subunit of the coatomer	Golgi,Golgi to ER
YAR018C	KIN3	0.0781866	Nonessential serine/threonine protein kinase	N/A
YDL209C	CWC2	0.0781728	Member of the NineTeen Complex (NTC)	nucleus
YBR018C	GAL7	0.0781118	Galactose-1-phosphate uridyl transferase	N/A
YER050C	RSM18	0.0771995	Mitochondrial ribosomal protein of the small subunit	N/A
YPL099C	FMP14	0.076786	F1F0 ATPase synthase peripheral stalk assembly factor	N/A
YDL128W	VCX1	0.076369	Vacuolar membrane antiporter with Ca2+/H+ and K+/H+ exchange activity	ER
YLR107W	REX3	0.0760489	RNA exonuclease	cytoplasm,nucleus
YOR382W	FIT2	0.0749076	Mannoprotein that is incorporated into the cell wall	N/A
YPL119C	DBP1	0.073604	ATP-dependent RNA helicase of the DEAD-box protein family	cytoplasm
YCL061C	MRC1	0.0731843	S-phase checkpoint protein required for DNA replication	nucleus
YER173W	RAD24	0.0728073	Checkpoint protein	cytoplasm,nucleus
YJR077C	MIR1	0.0720279	Mitochondrial phosphate carrier	mitochondrion
YGR215W	RSM27	0.0718787	Mitochondrial ribosomal protein of the small subunit	mitochondrion
YDL046W	NPC2	0.0716894	Sterol transport protein and functional homolog of human NPC2/He1	vacuole
YKR039W	GAP1	0.0715018	General amino acid permease	vacuole
YJR055W	HIT1	0.0714563	Protein involved in C/D snoRNP assembly	cytoplasm,nucleus
YOR178C	GAC1	0.0712198	Regulatory subunit for Glc7p type-1 protein phosphatase (PP1)	N/A
YPR185W	ATG13	0.0707516	Regulatory subunit of the Atg1p signaling complex	cytoplasm
YCL051W	LRE1	0.0706339	Protein involved in control of cell wall structure and stress response	N/A
YLR193C	YLR193C	0.0705121	Phosphatidic acid transfer protein	mitochondrion
YDR113C	PDS1	0.0703974	Securin	N/A
YGR136W	LSB1	0.0693959	Negative regulator of actin nucleation-promoting factor activity	cytoplasm,nucleus
YMR306W	FKS3	0.0690324	Protein involved in spore wall assembly	N/A
YFL042C	YFL042C	0.0689534	Putative sterol transfer protein	N/A
YOR358W	HAP5	0.0685077	Subunit of the Hap2p/3p/4p/5p CCAAT-binding complex	cytoplasm,nucleus
YKR084C	HBS1	0.0685019	GTPase with similarity to translation release factors	cytoplasm
YBR203W	COS111	0.068289	Protein required for antifungal drug ciclopirox olamine resistance	N/A
YDR003W-A	YDR003W-A	0.068202	Putative protein of unknown function	N/A
YMR043W	MCM1	0.0681163	Transcription factor	nucleus
YHR088W	RPF1	0.0680289	Protein involved in assembly and export of the large ribosomal subunit	N/A
YJL123C	YJL123C	0.0680289	Protein of unknown function that may interact with ribosomes	cytoplasm,Golgi,Golgi to ER
YER039C-A	YER039C-A	0.0675879	Putative protein of unknown function	N/A
YMR200W	ROT1	0.067202	Molecular chaperone involved in protein folding in ER	ER
YDR168W	CDC37	0.0668869	Essential Hsp90p co-chaperone	cytoplasm
YGR210C	YGR210C	0.0659985	Putative protein of unknown function	cytoplasm
YGR234W	YHB1	0.0659256	Nitric oxide oxidoreductase	cytoplasm
YOL025W	LAG2	0.0652214	Protein that negatively regulates the SCF E3-ubiquitin ligase	N/A
YFL007W	BLM3	0.0646775	Proteasome activator	cytoplasm,nucleus
YNL130C	CPT1	0.0645286	Cholinephosphotransferase	punctate composite
YPL101W	ELP4	0.0645286	Subunit of hexameric RecA-like ATPase Elp456 Elongator subcomplex	N/A
YNL220W	ADE12	0.064336	Adenylosuccinate synthase	cytoplasm
YHR039C-A	VMA10	0.0640672	Subunit G of the V1 peripheral membrane domain of V-ATPase	vacuolar membrane
YHR041C	SRB2	0.063772	Subunit of the RNA polymerase II mediator complex	cytoplasm,nucleus
YAL023C	PMT2	0.063525	Protein O-mannosyltransferase of the ER membrane	ER
YIL151C	YIL151C	0.0633885	hEST1A/B (SMG5/6)-like protein	ambiguous
YOR099W	KTR1	0.062125	Alpha-1,2-mannosyltransferase	vacuole
YOL102C	TPT1	0.0619082	tRNA 2'-phosphotransferase that catalyzes final step in tRNA splicing	cytoplasm
YDR108W	GSG1	0.061767	Component of transport protein particle (TRAPP) complex III	cytoplasm
YML043C	RRN11	0.0615675	Component of the core factor (CF) rDNA transcription factor complex	nucleolus,microtubule
YER106W	MAM1	0.0611825	Monopolin	N/A
YGL138C	YGL138C	0.0610995	Putative protein of unknown function	N/A
YHR058C	MED6	0.0607845	Subunit of the RNA polymerase II mediator complex	cytoplasm,nucleus
YLR006C	SSK1	0.0606144	Cytoplasmic phosphorelay intermediate osmosensor and regulator	cytoplasm
YGL055W	OLE1	0.0605004	Delta(9) fatty acid desaturase	ER
YIL073C	SPO22	0.060339	Meiosis-specific protein essential for chromosome synapsis	N/A
YBR095C	RXT2	0.0602021	Component of the histone deacetylase Rpd3L complex	nucleus
YBL010C	YBL010C	0.0594909	Clathrin adaptor (adaptin) accessory protein	Golgi to vacuole
YGL086W	MAD1	0.0594319	Coiled-coil protein involved in spindle-assembly checkpoint	nuclear periphery
YHR113W	YHR113W	0.0594319	Cytoplasmic aspartyl aminopeptidase with possible vacuole function	cytoplasm
YDR258C	HSP78	0.0593874	Oligomeric mitochondrial matrix chaperone	mitochondrion
YOR090C	PTC5	0.0593019	Mitochondrial type 2C protein phosphatase (PP2C)	N/A
YOR302W	YOR302W	0.0592728	CPA1 uORF	cytoplasm,nucleus
YHR031C	RRM3	0.0592527	DNA helicase involved in rDNA replication and Ty1 transposition	cytoplasm,nucleus
YGL176C	YGL176C	0.0588834	Putative protein of unknown function	N/A
YPR188C	MLC2	0.0588228	Regulatory light chain for the type II myosin Myo1p	bud neck
YNL051W	COG5	0.0587781	Component of the conserved oligomeric Golgi complex	Golgi,Golgi to ER
YGR174W-A	YGR174W-A	0.0584133	Putative protein of unknown function	N/A
YFR007W	YFR007W	0.0582653	Putative kinase with similarity to the PRK/URK/PANK kinase subfamily	N/A
YML036W	YML036W	0.0581147	Component of the EKC/KEOPS complex	N/A
YER132C	PMD1	0.0578397	Protein with an N-terminal kelch-like domain	cytoplasm
YJL126W	NIT2	0.0574915	Nit protein	N/A
YLL003W	SFI1	0.0574832	Centrin (Cdc31p)-binding protein required for SPB duplication	spindle pole
YJR127C	ZMS1	0.057471	Zinc-finger protein	nucleus
YJL112W	MDV1	0.0572241	Peripheral protein of cytosolic face of mitochondrial outer membrane	mitochondrion
YHR092C	HXT4	0.0571868	High-affinity glucose transporter	N/A
YJL104W	PAM16	0.0568911	Subunit of the import motor (PAM complex)	mitochondrion
YDL171C	GLT1	0.056865	NAD(+)-dependent glutamate synthase (GOGAT)	ambiguous
YPL244C	HUT1	0.056752	Protein with a role in UDP-galactose transport to the Golgi lumen	N/A
YOR079C	ATX2	0.0567301	Golgi membrane protein involved in manganese homeostasis	N/A
YNL336W	COS1	0.0564732	Endosomal protein involved in turnover of plasma membrane proteins	vacuole
YKR072C	SIS2	0.0564351	Negative regulatory subunit of protein phosphatase 1 (Ppz1p)	cytoplasm
YJL106W	IME2	0.0561796	Serine/threonine protein kinase involved in activation of meiosis	N/A
YMR001C	CDC5	0.0556505	Polo-like kinase essential for mitotic cell cycle	bud neck,nucleus
YLR131C	ACE2	0.0546932	Transcription factor required for septum destruction after cytokinesis	cytoplasm,nucleus,bud
YJR069C	HAM1	0.0535492	Nucleoside triphosphate pyrophosphohydrolase	cytoplasm,nucleus
YGL043W	DST1	0.0527969	General transcription elongation factor TFIIS	nucleus
YER079W	YER079W	0.052369	Putative protein of unknown function	cytoplasm,nucleus
YLR371W	ROM2	0.0522644	Guanine nucleotide exchange factor (GEF) for Rho1p and Rho2p	bud neck,cytoplasm,bud
YOR087W	YVC1	0.0510047	Vacuolar cation channel	ER,cytoplasm
YBL098W	BNA4	0.0509578	Kynurenine 3-monooxygenase	mitochondrion
YBR026C	ETR1	0.0506219	2-enoyl thioester reductase	mitochondrion
YBL091C	MAP2	0.0506117	Methionine aminopeptidase	cytoplasm,nucleus
YAL061W	YAL061W	0.0504485	Putative medium-chain alcohol dehydrogenase with similarity to BDH1	cytoplasm,nucleus
YNL270C	ALP1	0.0500211	Arginine transporter	N/A
YDR457W	TOM1	0.0496712	E3 ubiquitin ligase of the hect-domain class	nucleolus,nucleus
YJR149W	YJR149W	0.0492815	Putative protein of unknown function	cytoplasm
YMR250W	GAD1	0.0491212	Glutamate decarboxylase	cytoplasm
YNL108C	YNL108C	0.0488836	Protein phosphatase	cytoplasm,nucleus
YDL146W	YDL146W	0.0485424	Protein involved in the regulation of endocytosis	ambiguous,bud neck,cytoplasm,cell periphery,bud
YNL107W	YAF9	0.0484447	Subunit of NuA4 histone H4 acetyltransferase and SWR1 complexes	cytoplasm,nucleus
YPR103W	PRE2	0.0478609	Beta 5 subunit of the 20S proteasome	cytoplasm,nucleus
YHR212W-A	YHR212W-A	0.046568	Pseudogenic fragment with similarity to flocculins	N/A
YGL246C	RAI1	0.0458361	Nuclear protein with decapping endonuclease activity	nucleus
YCR015C	YCR015C	0.0456873	Protein required for cold tolerance	N/A
YDR465C	RMT2	0.0450718	Arginine N5 methyltransferase	cytoplasm,nucleus
YBL102W	SFT2	0.0450593	Tetra-spanning membrane protein found mostly in the late Golgi	Golgi to ER
YOR213C	SAS5	0.0449911	Subunit of the SAS complex (Sas2p, Sas4p, Sas5p)	cytoplasm,nucleus
YGL110C	CUE3	0.0446266	Subunit of ribosome-associated quality control trigger complex (RQT)	cytoplasm
YOR031W	CRS5	0.0445809	Copper-binding metallothionein	N/A
YGL192W	IME4	0.0444571	mRNA N6-adenosine methyltransferase essential for meiosis in S288C but	N/A
YGL221C	NIF3	0.0443667	Protein of unknown function	cytoplasm,mitochondrion
YNL246W	VPS75	0.0439983	NAP family histone chaperone	nucleus
YNL110C	NOP15	0.0436388	Constituent of 66S pre-ribosomal particles	nucleolus,nucleus
YDR490C	PKH1	0.0435683	Serine/threonine protein kinase	N/A
YER177W	BMH1	0.0435054	14-3-3 protein, major isoform	cytoplasm
YPR035W	GLN1	0.0431381	Glutamine synthetase (GS)	cytoplasm
YDR506C	YDR506C	0.0428313	Protein involved in meiotic progression	N/A
YDR532C	YDR532C	0.0422165	Subunit of a kinetochore-microtubule binding complex	ambiguous,spindle pole
YDR463W	STP1	0.042211	Transcription factor	nucleus
YHR106W	TRR2	0.0420866	Mitochondrial thioredoxin reductase	mitochondrion
YHL020C	OPI1	0.040921	Transcriptional regulator of a variety of genes	nuclear periphery
YDR176W	NGG1	0.0408998	Subunit of chromatin modifying histone acetyltransferase complexes	nucleus
YGR126W	YGR126W	0.0403838	Putative protein of unknown function	cytoplasm,nucleus
YLR032W	RAD5	0.0403152	DNA helicase/Ubiquitin ligase	cytoplasm,nucleus
YHR214C-D	YHR214C-D	0.0388928	Putative protein of unknown function	N/A
YOR347C	PYK2	0.0385863	Pyruvate kinase	cytoplasm
YKL174C	YKL174C	0.0383116	Protein involved in excretion of putrescine and spermidine	N/A
YDR166C	SEC5	0.038205	Essential 107kDa subunit of the exocyst complex	ambiguous,bud neck,cell periphery,bud
YER058W	PET117	0.0378339	Assembly factor that couples heme a synthesis to complex IV assembly	N/A
YJR001W	AVT1	0.037795	Vacuolar transporter	N/A
YLR082C	SRL2	0.0377917	Protein of unknown function	cytoplasm,nucleus
YBL095W	YBL095W	0.0371702	Protein that associates with mitochondrial ribosome	mitochondrion
YJL162C	JJJ2	0.0362688	Protein of unknown function	cytoplasm,nucleus
YIL127C	YIL127C	0.0362398	Putative protein of unknown function	nucleolus
YBR078W	ECM33	0.0362252	GPI-anchored protein involved in efficient glucose uptake	N/A
YER137C	YER137C	0.0362252	Putative protein of unknown function	N/A
YNL241C	ZWF1	0.0360344	Glucose-6-phosphate dehydrogenase (G6PD)	cytoplasm
YIL113W	SDP1	0.0360048	Stress-inducible dual-specificity MAP kinase phosphatase	mitochondrion
YLL018C-A	COX19	0.0360048	Protein required for cytochrome c oxidase assembly	cytoplasm,nucleus
YPL155C	KIP2	0.0359595	Kinesin-related motor protein involved in mitotic spindle positioning	spindle pole,microtubule
YNL242W	ATG2	0.0355317	Peripheral membrane protein required for autophagic vesicle formation	ambiguous
YKL135C	APL2	0.0347001	Beta-adaptin subunit of the clathrin-associated protein (AP-1) complex	Golgi to vacuole
YLR154W-F	YLR154W-F	0.0346588	Dubious open reading frame	N/A
YEL069C	HXT13	0.0346493	Putative transmembrane polyol transporter	N/A
YEL041W	YEL041W	0.0341368	ATP-NADH kinase	N/A
YJL115W	ASF1	0.0340505	Nucleosome assembly factor	nucleus
YKL195W	FMP15	0.0336729	Import and assembly protein in mitochondrial intermembrane space	mitochondrion
YDR528W	HLR1	0.0335576	Protein involved in regulation of cell wall composition and integrity	cytoplasm
YIR009W	MSL1	0.033343	U2B component of U2 snRNP	cytoplasm,nucleus
YGR116W	SPT6	0.0331853	Nucleosome remodeling protein	nucleus
YDR425W	SNX41	0.0324023	Sorting nexin	cytoplasm,endosome,lipid particle
YDR224C	HTB1	0.0314932	Histone H2B	nucleus
YJL194W	CDC6	0.0314592	Essential ATP-binding protein required for DNA replication	cytoplasm,nucleus
YML127W	RSC9	0.0314242	Component of the RSC chromatin remodeling complex	nucleus
YFL059W	SNZ3	0.0310375	Pyridoxal-5‚Äô-phosphate synthase	N/A
YAL063C	FLO9	0.0309555	Lectin-like protein with similarity to Flo1p	N/A
YJL193W	YJL193W	0.0304604	Putative protein of unknown function	N/A
YGL196W	YGL196W	0.0302847	D-serine dehydratase (aka D-serine ammonia-lyase)	N/A
YGL049C	TIF4632	0.0301846	Translation initiation factor eIF4G and scaffold protein	cytoplasm
YJR142W	YJR142W	0.0299613	8-oxo-dGTP diphosphatase of the Nudix hydrolase family	N/A
YKL093W	MBR1	0.0299384	Protein involved in mitochondrial functions and stress response	N/A
YOR043W	WHI2	0.02951	Negative regulator of TORC1 in response to limiting leucine	cell periphery
YER026C	CHO1	0.028811	Phosphatidylserine synthase	N/A
YML017W	PSP2	0.0288076	Asn rich cytoplasmic protein that contains RGG motifs	cytoplasm
YLR430W	SEN1	0.0283679	ATP-dependent 5' to 3' RNA/DNA and DNA helicase	nucleus
YBL068W	PRS4	0.0279283	5-phospho-ribosyl-1(alpha)-pyrophosphate synthetase, synthesizes PRPP	cytoplasm
YER139C	YER139C	0.027825	CTD phosphatase, dephosphorylates S5 in C-terminal domain of Rpo21p	cytoplasm
YDR386W	MUS81	0.0276243	Subunit of structure-specific Mms4p-Mus81p endonuclease	N/A
YER187W	YER187W	0.0273618	Putative protein of unknown function	N/A
YLL028W	TPO1	0.026938	Polyamine transporter of the major facilitator superfamily	ER,cell periphery,bud
YFR032C	YFR032C	0.0268793	Putative protein of unknown function	N/A
YKL181W	PRS1	0.026723	5-phospho-ribosyl-1(alpha)-pyrophosphate synthetase	cytoplasm
YER109C	FLO8	0.0266604	Transcription factor	N/A
YLR336C	SGD1	0.0265838	Essential nuclear protein	nucleolus
YGL183C	MND1	0.026579	Protein required for recombination and meiotic nuclear division	N/A
YGL252C	RTG2	0.0264851	Sensor of mitochondrial dysfunction	cytoplasm
YEL030W	ECM10	0.0261308	Heat shock protein of the Hsp70 family	N/A
YDL145C	COP1	0.0260179	Alpha subunit of COPI vesicle coatomer complex	Golgi,Golgi to ER
YJL030W	MAD2	0.026	Component of the spindle-assembly checkpoint complex	cytoplasm,nucleus
YMR048W	CSM3	0.0257567	Replication fork associated factor	nucleus
YBL022C	PIM1	0.0256311	ATP-dependent Lon protease	mitochondrion
YMR022W	QRI8	0.0250869	Ubiquitin conjugating enzyme	ER
YDR399W	HPT1	0.0249815	Dimeric hypoxanthine-guanine phosphoribosyltransferase	cytoplasm,nucleus
YMR030W	RSF1	0.0248878	Protein required for respiratory growth	cytoplasm,nucleus
YDR363W-A	SEM1	0.0248037	19S proteasome regulatory particle lid subcomplex component	nucleus
YGR249W	MGA1	0.0247353	Protein similar to heat shock transcription factor	N/A
YBR103W	SIF2	0.0246389	WD40 repeat-containing subunit of Set3C histone deacetylase complex	nucleus
YDR240C	SNU56	0.0241868	Component of U1 snRNP required for mRNA splicing via spliceosome	nucleus
YBR126C	TPS1	0.02413	Synthase subunit of trehalose-6-P synthase/phosphatase complex	cytoplasm
YDR395W	SXM1	0.0238178	Nuclear transport factor (karyopherin)	cytoplasm,nucleus
YBR184W	YBR184W	0.0237259	Putative protein of unknown function	N/A
YJL223C	PAU1	0.0234412	Member of the seripauperin multigene family	N/A
YLR467W	YRF1-5	0.0233334	Helicase encoded by the Y' element of subtelomeric regions	N/A
YNL098C	RAS2	0.0229741	GTP-binding protein	cytoplasm,nucleus
YEL055C	POL5	0.0224453	Protein involved in 60S assembly and pre-40S AFs recycling	nucleolus,nucleus
YDL231C	BRE4	0.0224141	Zinc finger protein containing five transmembrane domains	N/A
YNL008C	ASI3	0.0219798	Subunit of the inner nuclear membrane Asi ubiquitin ligase complex	nuclear periphery
YLR218C	YLR218C	0.0219504	Twin Cx(9)C protein involved in cytochrome c oxidase organization	cytoplasm,nucleus
YDR190C	RVB1	0.0218217	ATP-dependent DNA helicase, also known as pontin	nucleus
YGL063W	PUS2	0.0214311	Mitochondrial tRNA:pseudouridine synthase	N/A
YOR354C	MSC6	0.0209088	Multicopy suppressor of HER2 involved in mitochondrial translation	mitochondrion
YBR013C	YBR013C	0.0206223	Putative protein of unknown function	N/A
YMR066W	SOV1	0.0205444	Mitochondrial protein of unknown function	mitochondrion
YMR271C	URA10	0.0205293	Minor orotate phosphoribosyltransferase (OPRTase) isozyme	cytoplasm
YMR191W	SPG5	0.0204614	Protein required for proteasome assembly during quiescence	N/A
YBR072C-A	YBR072C-A	0.0204238	Putative protein of unknown function	N/A
YHR163W	SOL3	0.0201567	6-phosphogluconolactonase	cytoplasm,nucleus
YPR164W	MMS1	0.0200453	Subunit of E3 ubiquitin ligase complex involved in replication repair	N/A
YKL120W	OAC1	0.0200024	Mitochondrial inner membrane transporter	mitochondrion
YDR476C	YDR476C	0.0198786	Putative protein of unknown function	ER
YOL091W	SPO21	0.019202	Component of the meiotic outer plaque of the spindle pole body	N/A
YCR003W	MRPL32	0.0190333	Mitochondrial ribosomal protein of the large subunit	mitochondrion
YKL221W	MCH2	0.01894	Protein with similarity to mammalian monocarboxylate permeases	N/A
YDR204W	COQ4	0.0186425	Protein with a role in ubiquinone (Coenzyme Q) biosynthesis	ambiguous,mitochondrion
YJL034W	KAR2	0.0186077	ATPase involved in protein import into the ER	ambiguous
YGR251W	YGR251W	0.018389	Ribosome biogenesis factor	nucleolus,nucleus
YER006W	NUG1	0.0181054	GTPase that associates with nuclear 60S pre-ribosomes	nucleolus,nucleus
YLR180W	SAM1	0.0179813	S-adenosylmethionine synthetase	cytoplasm
YGL151W	NUT1	0.0171	Component of the RNA polymerase II mediator complex	nucleus
YLR397C	AFG2	0.0164944	ATPase of the CDC48/PAS1/SEC18 (AAA) family, forms a hexameric complex	cytoplasm
YHR103W	SBE22	0.0163908	Protein involved in bud growth	cytoplasm
YHR026W	PPA1	0.0158553	Subunit c'' of the vacuolar ATPase	ER,vacuole
YHR037W	PUT2	0.0158553	Delta-1-pyrroline-5-carboxylate dehydrogenase	mitochondrion
YML012W	ERV25	0.0158553	Member of the p24 family involved in ER to Golgi transport	ER
YOR221C	MCT1	0.0158553	Predicted malonyl-CoA:ACP transferase	mitochondrion
YER023W	PRO3	0.0153052	Delta 1-pyrroline-5-carboxylate reductase	cytoplasm
YNL027W	CRZ1	0.0152972	Transcription factor, activates transcription of stress response genes	cytoplasm
YJL117W	PHO86	0.0146527	Endoplasmic reticulum (ER) resident protein	ER
YER134C	YER134C	0.0145797	Magnesium-dependent acid phosphatase	cytoplasm,nucleus
YBR030W	YBR030W	0.0145285	Ribosomal lysine methyltransferase	nucleus
YPL049C	DIG1	0.0145131	MAP kinase-responsive inhibitor of the Ste12p transcription factor	nucleus
YNR041C	COQ2	0.0144562	Para hydroxybenzoate polyprenyl transferase	mitochondrion
YPL246C	RBD2	0.0142224	Possible rhomboid protease	Golgi,Golgi to ER
YGR112W	SHY1	0.0141417	Mitochondrial inner membrane protein required for complex IV assembly	mitochondrion
YJR048W	CYC1	0.0139219	Cytochrome c, isoform 1	cytoplasm,nucleus
YMR017W	SPO20	0.0137956	Meiosis-specific subunit of the t-SNARE complex	N/A
YBR281C	YBR281C	0.0132936	Component of glutamine amidotransferase (GATase II)	cytoplasm,nucleus
YER049W	YER049W	0.0131871	Prolyl hydroxylase	nucleus
YFR012W	YFR012W	0.0131871	Protein of unknown function	N/A
YFR019W	FAB1	0.0130168	1-phosphatidylinositol-3-phosphate 5-kinase	vacuolar membrane
YLR265C	NEJ1	0.0128495	Protein involved in regulation of nonhomologous end joining	cytoplasm,nucleus
YOR250C	CLP1	0.0127275	Component of the cleavage and polyadenylation factor I (CF I)	N/A
YJR103W	URA8	0.0121011	Minor CTP synthase isozyme (see also URA7)	cytoplasm
YDR296W	MHR1	0.0117451	Mitochondrial ribosomal protein of the large subunit	mitochondrion
YMR091C	NPL6	0.0116453	Component of the RSC chromatin remodeling complex	nucleus
YOR280C	FSH3	0.0115936	Putative serine hydrolase	N/A
YJL044C	GYP6	0.0114545	GTPase-activating protein (GAP) for yeast Rab family member Ypt6p	Golgi to vacuole
YGR257C	MTM1	0.0110883	Mitochondrial protein of the mitochondrial carrier family	mitochondrion
YDR366C	YDR366C	0.0100261	Putative protein of unknown function	N/A
YLR354C	TAL1	0.00884447	Transaldolase, enzyme in the non-oxidative pentose phosphate pathway	nucleus
YDR353W	TRR1	0.00835818	Cytoplasmic thioredoxin reductase	cytoplasm,nucleus
YDR001C	NTH1	0.00825806	Neutral trehalase, degrades trehalose	cytoplasm
YDR182W-A	YDR182W-A	0.00817613	Putative protein of unknown function	N/A
YPL243W	SRP68	0.00708118	Core component of the signal recognition particle (SRP) complex	cytoplasm
YHR081W	LRP1	0.00691147	Nuclear exosome-associated nucleic acid binding protein	N/A
YDR407C	TRS120	0.00588608	Component of transport protein particle (TRAPP) complex II	Golgi to vacuole
YLR052W	IES3	0.00443812	Subunit of the INO80 chromatin remodeling complex	nucleus
YPL123C	RNY1	0.00437846	Vacuolar RNase of the T(2) family	N/A
YFR031C-A	RPL2A	0.00387208	Ribosomal 60S subunit protein L2A	cytoplasm
YDR453C	TSA2	0.00382001	Stress inducible cytoplasmic thioredoxin peroxidase	cytoplasm
YDR488C	PAC11	0.00345863	Dynein intermediate chain, microtubule motor protein	N/A
YHR051W	COX6	0.0030533	Subunit VI of cytochrome c oxidase (Complex IV)	mitochondrion
YKR027W	FMP50	0.00295123	Member of the ChAPs (Chs5p-Arf1p-binding proteins) family	Golgi to vacuole
YDR501W	PLM2	0.0027066	Putative transcription factor, contains Forkhead Associated domain	N/A
YCR032W	BPH1	0.00214143	Protein homologous to Chediak-Higashi syndrome and Beige proteins	N/A
YCR037C	PHO87	0.00207033	Low-affinity inorganic phosphate (Pi) transporter	ambiguous
YOR092W	ECM3	0.00202067	Non-essential protein of unknown function	ER
YIL117C	PRM5	0.00199848	Pheromone-regulated protein, predicted to have 1 transmembrane segment	vacuole
YLR080W	EMP46	0.00169229	Integral membrane component of ER-derived COPII-coated vesicles	vacuole
YJR097W	JJJ3	0.000493307	Protein of unknown function	cytoplasm,nucleus
YDR362C	TFC6	0.000328236	Subunit of RNA polymerase III transcription initiation factor complex	nucleus
YGL127C	SOH1	0.000104585	Subunit of the RNA polymerase II mediator complex	nucleus
YLR426W	YLR426W	0.000104585	Putative protein of unknown function	0
YDL170W	UGA3	-0.000100393	Transcriptional activator for GABA-dependent induction of GABA genes	nucleus
YGR280C	PXR1	-0.000274792	Essential protein involved in rRNA and snoRNA maturation	nucleolus
YNL160W	YGP1	-0.000457177	Cell wall-related secretory glycoprotein	N/A
YCR068W	ATG15	-0.00155123	Phospholipase	N/A
YPL274W	SAM3	-0.00155123	High-affinity S-adenosylmethionine permease	ER
YJR158W	HXT16	-0.00164644	Putative transmembrane polyol transporter	N/A
YOL158C	ENB1	-0.00173091	Ferric enterobactin transmembrane transporter	N/A
YBR297W	MAL33	-0.00240132	MAL-activator protein	N/A
YNL076W	MKS1	-0.00307632	Pleiotropic negative transcriptional regulator	cytoplasm
YBL076C	ILS1	-0.00333126	Cytoplasmic isoleucine-tRNA synthetase	cytoplasm
YDL085W	NDE2	-0.00354593	Mitochondrial external NADH dehydrogenase	N/A
YPL088W	YPL088W	-0.00371702	Putative aryl alcohol dehydrogenase	N/A
YOR329C	SCD5	-0.00374962	Protein required for normal actin organization and endocytosis	ambiguous
YLR247C	YLR247C	-0.00388925	E3 ubiquitin ligase and putative helicase	nucleus
YJL146W	IDS2	-0.00445492	Protein involved in modulation of Ime2p activity during meiosis	cytoplasm,nucleus
YNL256W	FOL1	-0.0051627	Multifunctional enzyme of the folic acid biosynthesis pathway	cytoplasm,mitochondrion
YNL299W	TRF5	-0.0051627	Non-canonical poly(A) polymerase	nucleolus
YBR097W	VPS15	-0.00557069	Serine/threonine protein kinase involved in vacuolar protein sorting	endosome
YCL024W	KCC4	-0.00644465	Protein kinase of the bud neck involved in the septin checkpoint	ambiguous,bud neck,cell periphery,bud
YBR159W	YBR159W	-0.00734737	Microsomal beta-keto-reductase	ER
YDR093W	DNF2	-0.0074812	Aminophospholipid translocase (flippase)	ambiguous,cell periphery,bud
YOR374W	ALD4	-0.00801425	Mitochondrial aldehyde dehydrogenase	mitochondrion
YLR361C	DCR2	-0.00817419	Protein phosphatase	N/A
YPR121W	THI22	-0.0083995	Protein with similarity to hydroxymethylpyrimidine phosphate kinases	N/A
YPL091W	GLR1	-0.00868611	Cytosolic and mitochondrial glutathione oxidoreductase	cytoplasm,mitochondrion,nucleus
YGL050W	YGL050W	-0.00871959	tRNA methyltransferase required for synthesis of wybutosine	N/A
YMR072W	ABF2	-0.00913908	Mitochondrial DNA-binding protein	mitochondrion
YLL016W	SDC25	-0.00951306	Non-essential Ras guanine nucleotide exchange factor (GEF)	N/A
YHR015W	MIP6	-0.00963367	Putative RNA-binding protein	cytoplasm
YPR128C	ANT1	-0.00969144	Peroxisomal adenine nucleotide transporter	peroxisome
YAR029W	YAR029W	-0.00983337	Member of DUP240 gene family but contains no transmembrane domains	N/A
YGR133W	PEX4	-0.00998944	Peroxisomal ubiquitin conjugating enzyme	peroxisome
YGR199W	PMT6	-0.0105982	Protein O-mannosyltransferase	N/A
YHR079C	IRE1	-0.0116683	Serine-threonine kinase and endoribonuclease	ER
YBR117C	TKL2	-0.0120335	Transketolase	cytoplasm,nucleus
YDR216W	ADR1	-0.0121687	Carbon source-responsive zinc-finger transcription factor	cytoplasm
YMR029C	FAR8	-0.012308	Protein involved in recovery from arrest in response to pheromone	ER,ambiguous,cytoplasm
YNL255C	GIS2	-0.0125998	Translational activator for mRNAs with internal ribosome entry sites	cytoplasm
YLR245C	CDD1	-0.0127229	Cytidine deaminase	cytoplasm,nucleus
YCL028W	RNQ1	-0.0128122	[PIN(+)] prion	cytoplasm,nucleus
YMR311C	GLC8	-0.0132544	Regulatory subunit of protein phosphatase 1 (Glc7p)	cytoplasm,nucleus
YDR079C-A	YDR079C-A	-0.0132641	Component of RNA polymerase II general transcription factor TFIIH	nucleus
YDL025C	YDL025C	-0.0142904	Putative protein kinase, potentially phosphorylated by Cdc28p	ambiguous
YFL053W	DAK2	-0.0143949	Dihydroxyacetone kinase	N/A
YHR210C	YHR210C	-0.0147358	Putative aldose 1-epimerase superfamily protein	N/A
YER043C	SAH1	-0.0150102	S-adenosyl-L-homocysteine hydrolase	cytoplasm
YJL069C	UTP18	-0.0152933	Small-subunit processome protein involved in pre-18S rRNA maturation	nucleolus
YJR130C	STR2	-0.0165304	Cystathionine gamma-synthase, converts cysteine into cystathionine	cytoplasm,nucleus
YGL125W	MET13	-0.0169214	Major isozyme of methylenetetrahydrofolate reductase	cytoplasm,nucleus
YHR153C	SPO16	-0.0170336	Meiosis-specific protein involved in synaptonemal complex assembly	N/A
YCR106W	RDS1	-0.0171123	Putative zinc cluster transcription factor	N/A
YDL245C	HXT15	-0.0175135	Putative transmembrane polyol transporter	N/A
YJL013C	MAD3	-0.0176266	Subunit of spindle-assembly checkpoint complex	cytoplasm,nucleus
YKR097W	PCK1	-0.018074	Phosphoenolpyruvate carboxykinase	N/A
YGR035C	YGR035C	-0.0182416	Putative protein of unknown function, potential Cdc28p substrate	N/A
YKL190W	CNB1	-0.0194502	Calcineurin B	cytoplasm
YJR148W	BAT2	-0.0197943	Cytosolic branched-chain amino acid (BCAA) aminotransferase	cytoplasm,nucleus
YBR201W	DER1	-0.020213	ER membrane protein that promotes export of misfolded polypeptides	N/A
YPL042C	SSN3	-0.0203761	Cyclin-dependent protein kinase	N/A
YGR203W	YGR203W	-0.0203998	Phosphatase with sequence similarity to Mih1p	cytoplasm,nucleus
YFL045C	SEC53	-0.0208012	Phosphomannomutase	cytoplasm,nucleus
YPL204W	HRR25	-0.0209727	Conserved casein kinase, monopolin subunit	ambiguous,bud neck,cytoplasm,nucleus,bud
YJL180C	ATP12	-0.0215222	Assembly factor for F1 sector of mitochondrial F1F0 ATP synthase	cytoplasm
YPR104C	FHL1	-0.0215352	Regulator of ribosomal protein (RP) transcription	nucleus
YJR151W-A	YJR151W-A	-0.0215564	Putative protein of unknown function	N/A
YGL220W	YGL220W	-0.0221499	Cytosolic protein involved in repression of iron regulon transcription	cytoplasm,nucleus
[truncated: 2,215 more rows]
