# Supplementary material for: The VINE complex is an endosomal VPS9-domain GEF and SNX-BAR coat
Source: eLife. 2022 Aug 8;11:e77035. doi: 10.7554/eLife.77035 (PMC9507130; doi:10.7554/eLife.77035)
Supplement: Supplementary file 4. [file elife-77035-supp4.xlsx]

## Sheet: Table S4
Table S4: Yeast strains used in this study
Strain Name	Genotype	Source
BY4741	MATa his3Δ1 leu2Δ0 met15Δ0 ura3Δ0	Dr. EK O'Shea (Harvard), Huh et al., 2003 (PMID: 14562095)
BY4742	MATalpha his3Δ1 leu2Δ0 lys2Δ0 ura3Δ0	Dr. EK O'Shea (Harvard), Huh et al., 2003 (PMID: 14562095)
BBY1015	BY4742 DID2-mRuby2::KAN	This Study
BBY631	BY4741 SEC7-dsRed::URA3	This Study
Y6613	BY4741 lyp1Δ::STE3pr-LEU2 cyh	Gift from Dr. C Boone (U of T)
vin1Δ	BY4741 vin1Δ::KAN	MATa Deletion Mutant Collection, Giaever et al., 2002 (PMID: 12140549)
PW1	BY4741 VIN1-Envy::spHIS5	This Study
SSY001	BY4741 VIN1-3HA::KAN	This Study
BBY1027	BY4741 vps34Δ::NAT	This Study
BBY182	BY4741 muk1Δ::KAN vps9Δ::HIS3	Bean et al., 2015 (PMID: 25609093)
SSY831	MATalpha his3Δ1 leu2Δ0 met15Δ0 ura3Δ0 LYS+ VIN1pr-sfGFP-VIN1 can1Δ::GAL1pr-SceI::STE2pr-SpHIS5 lyp1Δ::STE3pr-LEU2	Schuldiner SWAT Seamless Collection, Weill et al., 2018 (PMID: 29988094)
SSY832	MATa his3Δ1 leu2Δ0 met15Δ0 ura3Δ0 hphΔn::URA3::spNOP1pr-sfGFP-VIN1	Schuldiner SWAT NOP1pr Collection, Weill et al., 2018 (PMID: 29988094)
SSY833	MATalpha his3∆1 leu2∆0 met15∆0 ura3∆0 LYS+ NAT::TEF2pr-mCherry-VIN1 can1∆::GAL1pr-SceI::STE2pr-SpHIS5 lyp1∆::STE3pr-LEU2	Schuldiner SWAT TEF2pr Collection, Weill et al., 2018 (PMID: 29988094)
VPS5-GFP	BY4741 VPS5-GFP::HIS3MX6	ATCC201388 (Invitrogen)
VPS17-GFP	BY4741 VPS17-GFP::HIS3MX6	ATCC201388 (Invitrogen)
MVP1-GFP	BY4741 MVP1-GFP::HIS3MX6	ATCC201388 (Invitrogen)
SNX4-GFP	BY4741 SNX4-GFP::HIS3MX6	ATCC201388 (Invitrogen)
SNX41-GFP	BY4741 SNX41-GFP::HIS3MX6	ATCC201388 (Invitrogen)
ATG20-GFP	BY4741 ATG20-GFP::HIS3MX6	ATCC201388 (Invitrogen)
VIN1-GFP	BY4741 VIN1-GFP::HIS3MX6	ATCC201388 (Invitrogen)
BBY69	BY4741 VPS5-3HA::Hph	This Study
ALY044	BY4741 VPS5-3HA::Hph vin1Δ::NAT	This Study
BBY8	BY4741 VPS26-3HA::Hph	This Study
BBY9	BY4741 VPS29-3HA::KAN	This Study
BBY11	BY4741 VPS35-3HA::Hph	This Study
BBY70	BY4741 VPS17-3HA::KAN	This Study
SSY096	BY4741 vps5Δ::NAT	This Study
VPS35-GFP	BY4741 VPS35-GFP::HIS3	Dr. EK O'Shea (Harvard), Huh et al., 2003 (PMID: 14562095)
SSY097	BY4741 VPS35-GFP::HIS3 vps5Δ::NAT	This Study
SSY730	BY4741 VPS35-GFP::HIS3 vps17Δ::Hph	This Study
SSY732	BY4741 VPS35-GFP::HIS3 vps5Δ::NAT vps17Δ::Hph	This Study
ALY043	BY4741 muk1Δ::KAN vps9Δ::HIS3 vin1Δ::NAT	This Study
SSY725	BY4741 muk1Δ::KAN vps9Δ::HIS3 vps5Δ::NAT	This Study
CUY100 (BY4727)	MATalpha his3Δ200 leu2Δ0 lys2Δ0 met15Δ0 trp1Δ63 ura3Δ0	Balderhaar et al., 2010 (PMID: 21062894)
CUY4412	BY4727 VPS26-GFP::KANMX4	Balderhaar et al., 2010 (PMID: 21062894)
BBY212	BY4727 VPS26-GFP::KANMX4 muk1Δ::KAN vps9Δ::HIS3	Bean et al., 2015 (PMID: 25609093)
MDY1201	BY4727 VPS26-GFP::KANMX4 muk1Δ::KAN vps9Δ::HIS3 vin1Δ::Hph	This Study
SSY743	BY4741 VPS26-mScarletI::caURA3	This Study
SSY782	BY4741 VPS26-mScarletI::caURA3 muk1Δ::KAN vps9Δ::HIS3	This Study
SSY745	BY4741 VPS26-mScarletI::caURA3 muk1Δ::KAN vps9Δ::HIS3 vin1Δ::NAT	This Study
SSY898	BY4741 hphΔn::URA3::spNOP1pr-sfGFP-VIN1 DID2-mRuby2::KAN	This Study, built in strain from Schuldiner SWAT NOP1pr Collection, Weill et al., 2018 (PMID: 29988094)
VPS10-GFP	BY4741 VPS10-GFP::HIS3	Dr. EK O'Shea (Harvard), Huh et al., 2003 (PMID: 14562095)
ATG27-GFP	BY4741 ATG27-GFP::HIS3	Dr. EK O'Shea (Harvard), Huh et al., 2003 (PMID: 14562095)
MRL1-GFP	BY4741 MRL1-GFP::HIS3	Dr. EK O'Shea (Harvard), Huh et al., 2003 (PMID: 14562095)
MFY54	BY4741 MRL1-mScarletI::caURA3	This Study
MFY78	BY4741 snx4Δ::KAN MRL1-mScarletI::caURA3	This Study
SSY957	MATalpha his3Δ1 leu2Δ0 met15Δ0 ura3Δ0 LYS+ VPS21pr-sfGFP-VPS21 MRL1-mScarletI::caURA3 can1Δ::GAL1pr-SceI::STE2pr-SpHIS5 lyp1Δ::STE3pr-LEU2	This Study, built in strain from Schuldiner SWAT Seamless Collection, Weill et al., 2018 (PMID: 29988094)
SSY958	MATalpha his3Δ1 leu2Δ0 met15Δ0 ura3Δ0 LYS+ YPT7pr-sfGFP-YPT7 MRL1-mScarletI::caURA3 can1Δ::GAL1pr-SceI::STE2pr-SpHIS5 lyp1Δ::STE3pr-LEU2	This Study, built in strain from Schuldiner SWAT Seamless Collection, Weill et al., 2018 (PMID: 29988094)
SSY960	BY4742 MRL1-mScarletI::NAT DID2-Envy::spHIS5	This Study
MDY1326	BY4741 VRL1	This Study
MFY57	BY4741 VRL1 MRL1-mScarletI::caURA3	This Study
