# Supplementary material for: The VINE complex is an endosomal VPS9-domain GEF and SNX-BAR coat
Source: eLife. 2022 Aug 8;11:e77035. doi: 10.7554/eLife.77035 (PMC9507130; doi:10.7554/eLife.77035)
Supplement: Supplementary file 5. [file elife-77035-supp5.xlsx]

## Sheet: Table S5
Table S5: Plasmids used in this study
Plasmid Name	Genotype	Marker	Source
pRS413	pRS413 CEN AmpR HIS3	HIS3	Sikorski and Hieter, 1989 (PMID: 2659436)
pRS415	pRS415 CEN AmpR LEU2	LEU2	Sikorski and Hieter, 1989 (PMID: 2659436)
pRS416	pRS416 CEN AmpR URA3	URA3	Sikorski and Hieter, 1989 (PMID: 2659436)
pRS425	pRS425 2𝜇 AmpR LEU2	LEU2	Sikorski and Hieter, 1989 (PMID: 2659436)
pMF10	pRS415-VRL1pr-VRL1-Envy	LEU2	This Study
pSS04	pRS416-ADH1pr-VRL1-4xL-DHFR[1,2]	URA3, NAT	This Study (Chretien et al., 2018 (PMID: 29496912))
pSS05	pRS416-ADH1pr-VRL1(1-465)-4xL-DHFR[1,2]	URA3, NAT	This Study (Chretien et al., 2018 (PMID: 29496912))
pPW1	pRS416-VRL1pr-VRL1-Envy	URA3	This Study
pSS016	pRS416-VRL1pr-VRL1(1-465)-Envy	URA3	This Study
pPW2	pRS416-ADH1pr-VRL1-Envy	URA3	This Study
pSS021	pRS416-ADH1pr-VRL1(1-465)-Envy	URA3	This Study
pMD133	pRS416-VRL1pr-VRL1	URA3	Bean et al., 2015 (PMID: 25609093)
pSS02	pRS416-VRL1pr-VRL1-3HA	URA3	This Study
pMD454	pRS415-VIN1pr-VIN1-mScarletI	LEU2	This Study
pSS06	pRS416-VRL1pr-VRL1(D373A)-Envy	URA3	This Study
pMD452	pRS416-VRL1pr-VRL1-mScarletI	URA3	This Study
pMD453	pRS415-VRL1pr-VRL1-mScarletI	LEU2	This Study
pBB23	pRS416-ADH1pr-VRL1	URA3	Bean et al., 2015 (PMID: 25609093)
pSS01	pRS415-ADH1pr-VRL1-3HA	LEU2	This Study
pSS03	pRS416-ADH1pr-VRL1(D373A)-Envy	URA3	This Study
pSS022	pRS416-ADH1pr-VRL1(158-end)-Envy	URA3	This Study
pSS049	pRS416-ADH1pr-Envy-VRL1(465-end)	URA3	This Study
pSS050	pRS416-ADH1pr-Envy-VRL1(700-end)	URA3	This Study
pSS051	pRS416-ADH1pr-VRL1(1-465)-YPT35(61-end)-Envy	URA3	This Study
pSS052	pRS416-ADH1pr-VRL1(1-703)-YPT35(61-end)-Envy	URA3	This Study
pMD188	pRS413-VPS10pr-VPS10-Envy	HIS3	Bean et al., 2017 (PMID:27883263)
pSS053	pRS415-ADH1pr-VRL1-Envy	LEU2	This Study
pSS055	pRS415-ADH1pr-YPT35(61-end)-Envy	LEU2	This Study
pSS046	pRS415-ADH1pr-VRL1(1-703)-YPT35(61-end)-Envy	LEU2	This Study
pSS056	pRS416-VIN1pr-VIN1-mScarletI	URA3	This Study
pSS059	pRS416-VIN1pr-VIN1(1-116)-mScarletI	URA3	This Study
pSS060	pRS416-VIN1pr-VPS5(1-276)-mScarletI	URA3	This Study
pSS064	pRS416-VIN1pr-VIN1(1-29)-mScarletI	URA3	This Study
pSS065	pRS416-VIN1pr-VIN1(41-78)-mScarletI	URA3	This Study
pSS067	pRS416-VIN1pr-VIN1(76-95)-mScarletI	URA3	This Study
pSS076	pRS415-ADH1pr-VRL1(1-703-EEDNE-5A)-YPT35(61-end)-Envy	LEU2	This Study
pSS078	pRS415-ADH1pr-VRL1(1-703-E510R)-YPT35(61-end)-Envy	LEU2	This Study
pSS079	pRS415-ADH1pr-VRL1(1-703-D511K)-YPT35(61-end)-Envy	LEU2	This Study
pBB21	pRS425-GFP-FYVE(EEA1)	LEU2	Bean et al., 2015 (PMID: 25609093)
pSS054	pRS415-ADH1pr-VRL1(D373A)-Envy	LEU2	This Study
pSS045	pRS415-ADH1pr-VRL1(1-465)-YPT35(61-end)-Envy	LEU2	This Study
pSS019	pRS415-ADH1pr-VRL1	LEU2	This Study
pSS020	pRS415-VRL1pr-VRL1(D373A)	LEU2	This Study
pMD212	pRS413-VPS10pr-VPS10(1-1421)-Envy	HIS3	Bean et al., 2017 (PMID:27883263)
pMF19	pRS413-VPS10pr-VPS10(1-1421)-MRL1(257-381)-Envy	HIS3	This Study
pSS017	pRS415-VRL1pr-VRL1	LEU2	This Study
