# Supplementary figures and images for: The VINE complex is an endosomal VPS9-domain GEF and SNX-BAR coat
Source: eLife journal article supplement (doi:10.7554/elife.77035), 2022-08-08

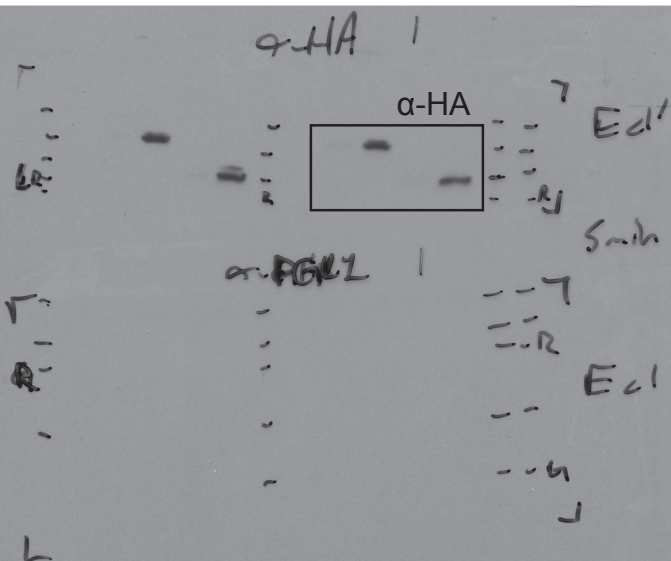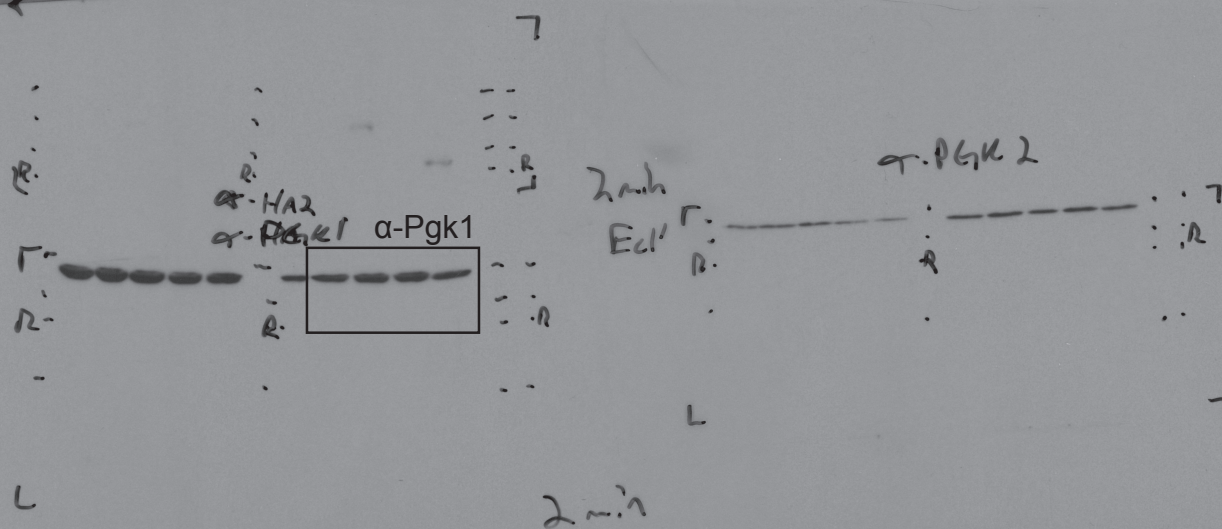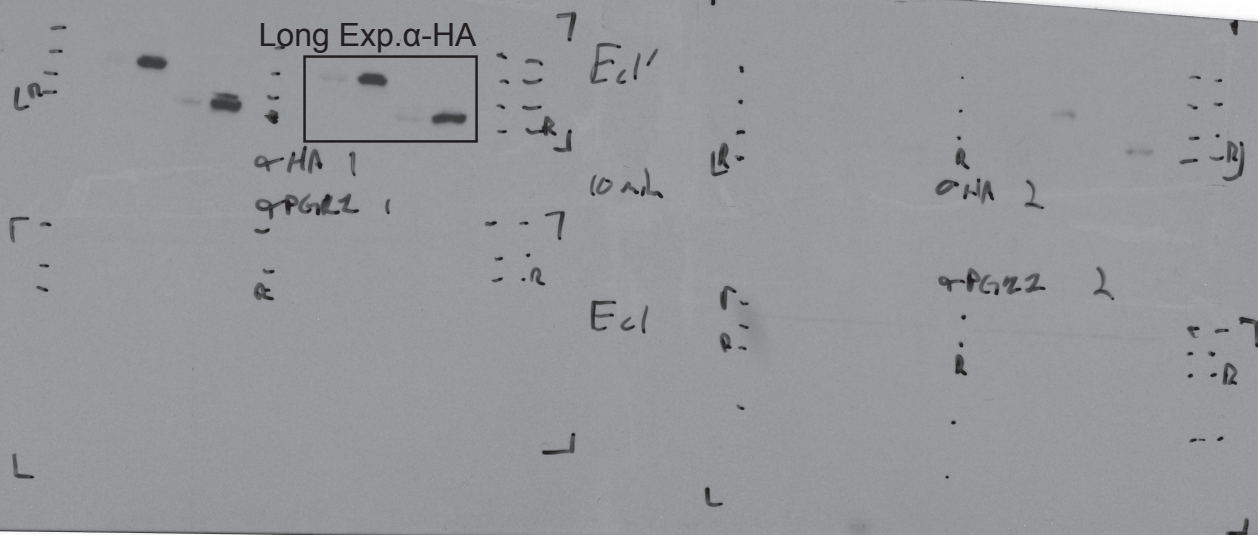

Supplement: fig2-data6 [file Figure 2D Uncropped Blots.pdf › Figure 2D Uncropped Blots.pdf]

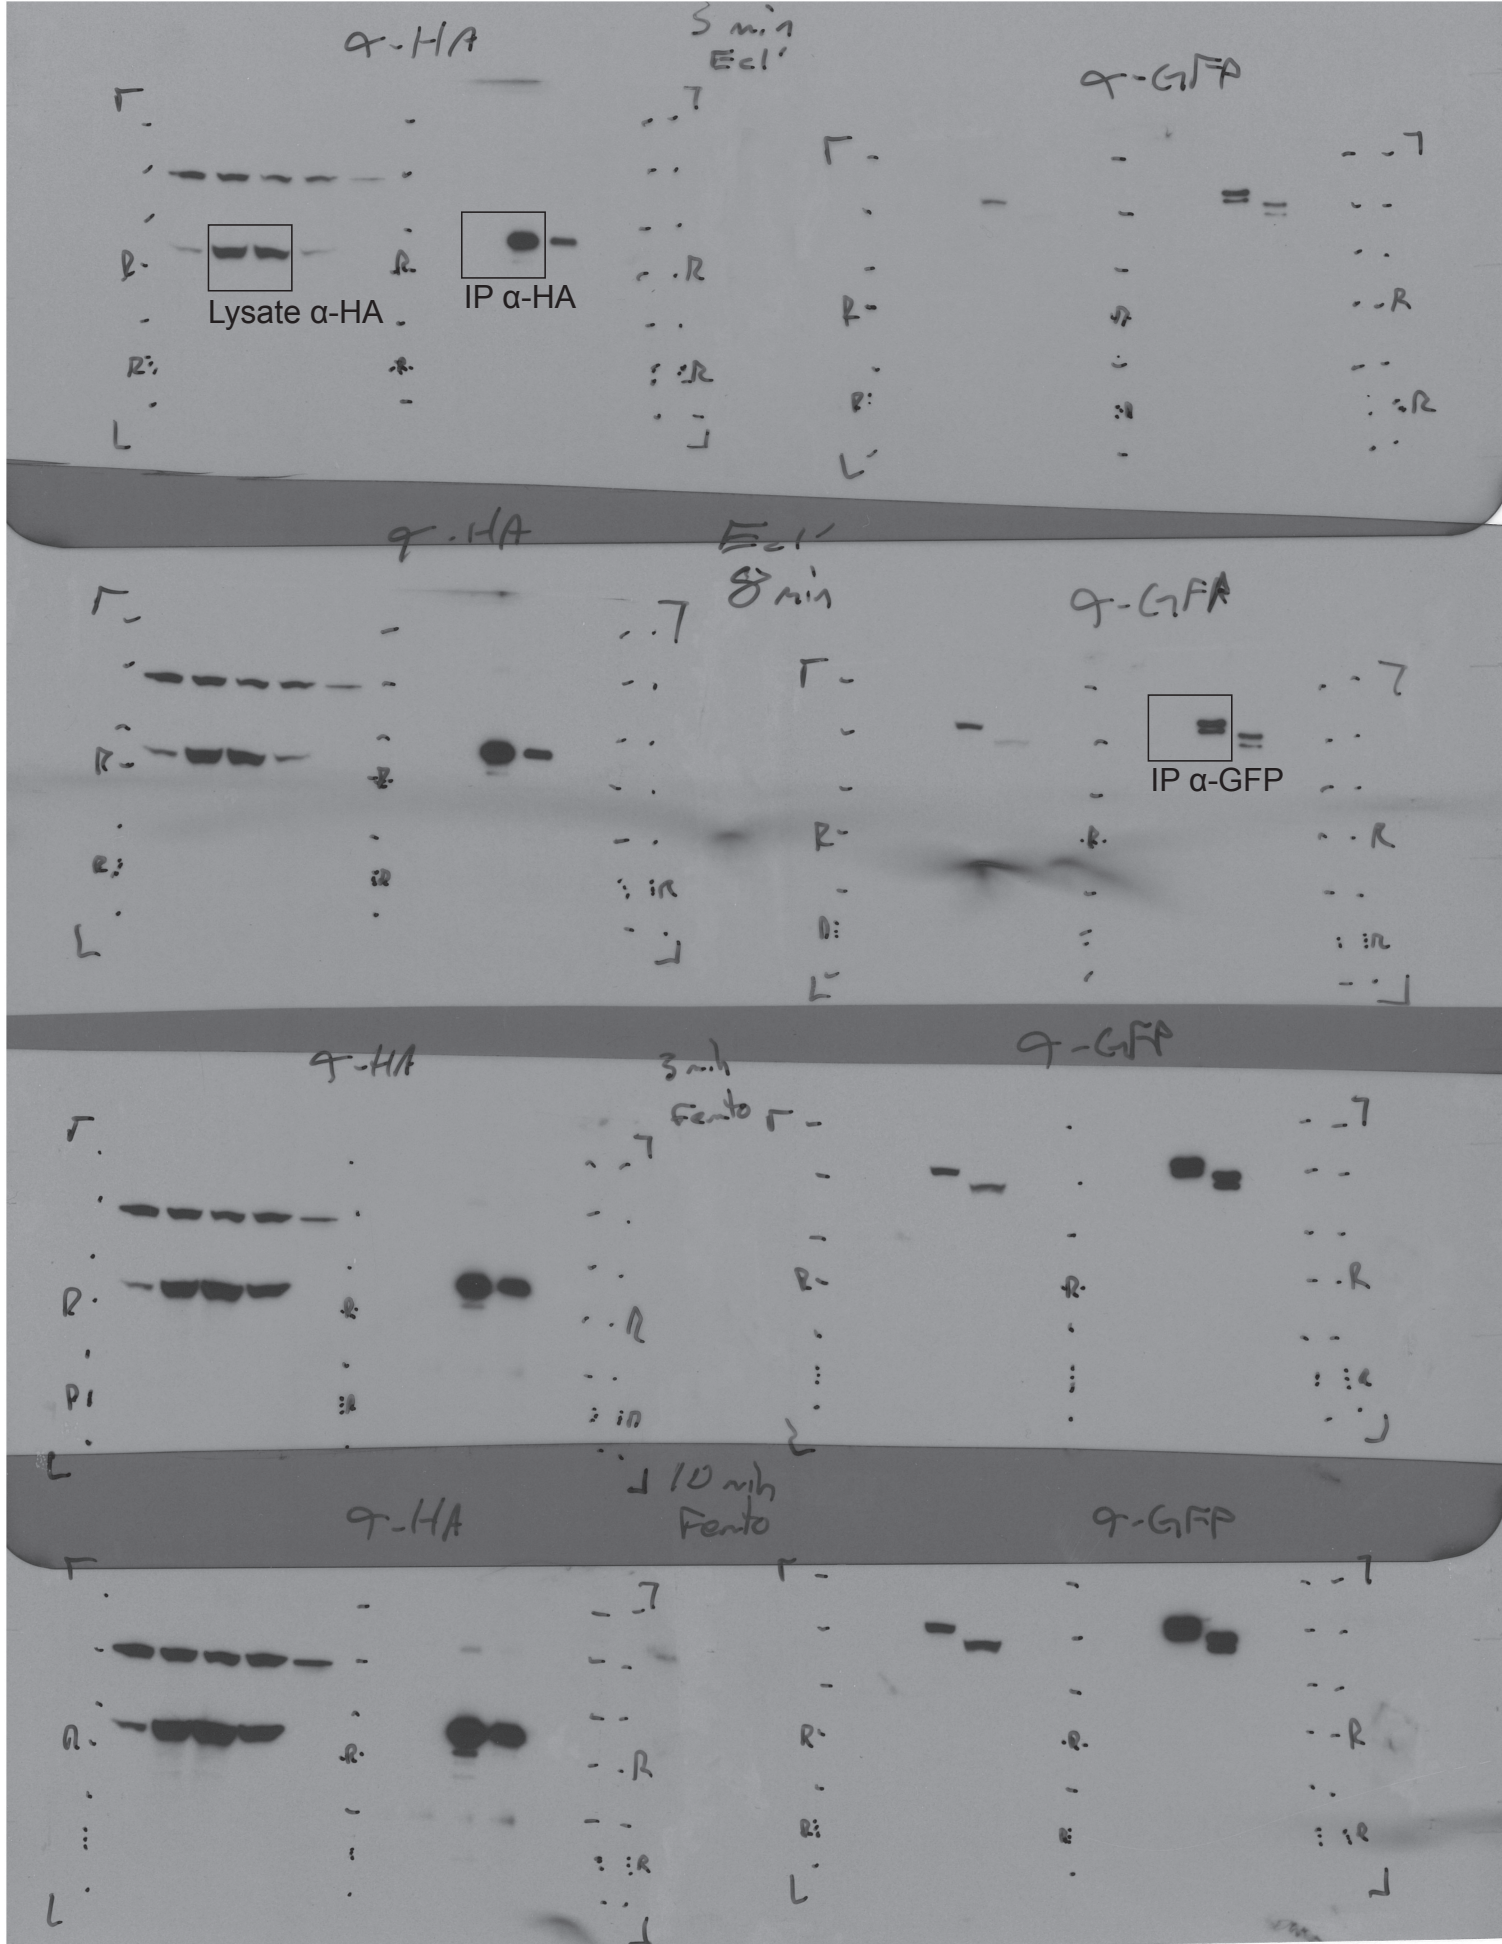

Supplement: fig2-data7 [file Figure 2F Uncropped Blots.pdf › Figure 2F Uncropped Blots.pdf]

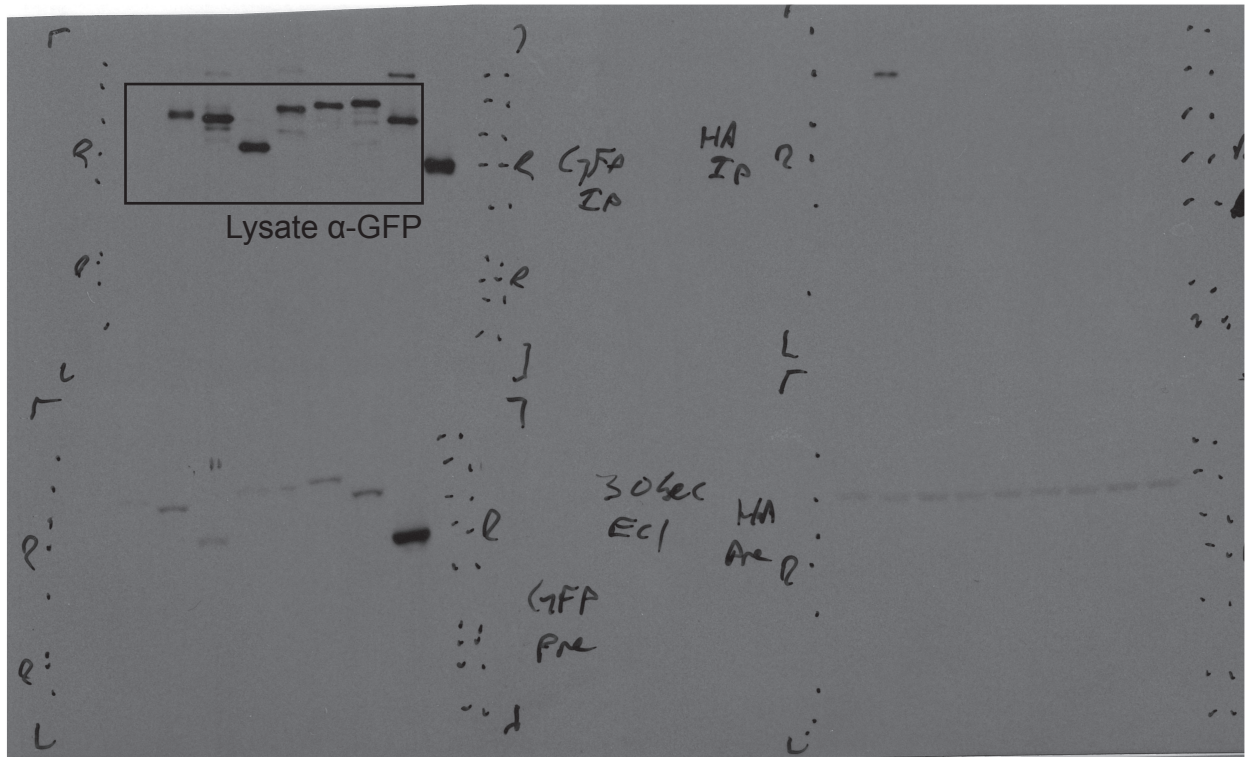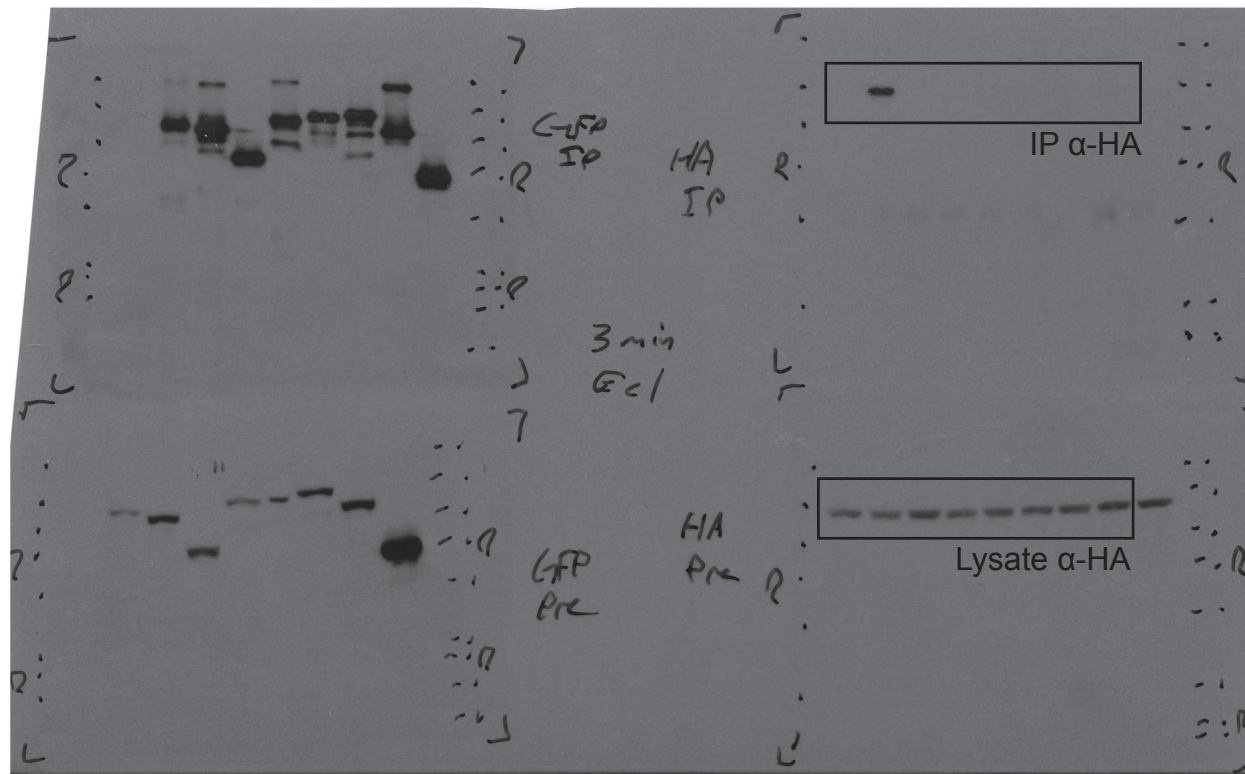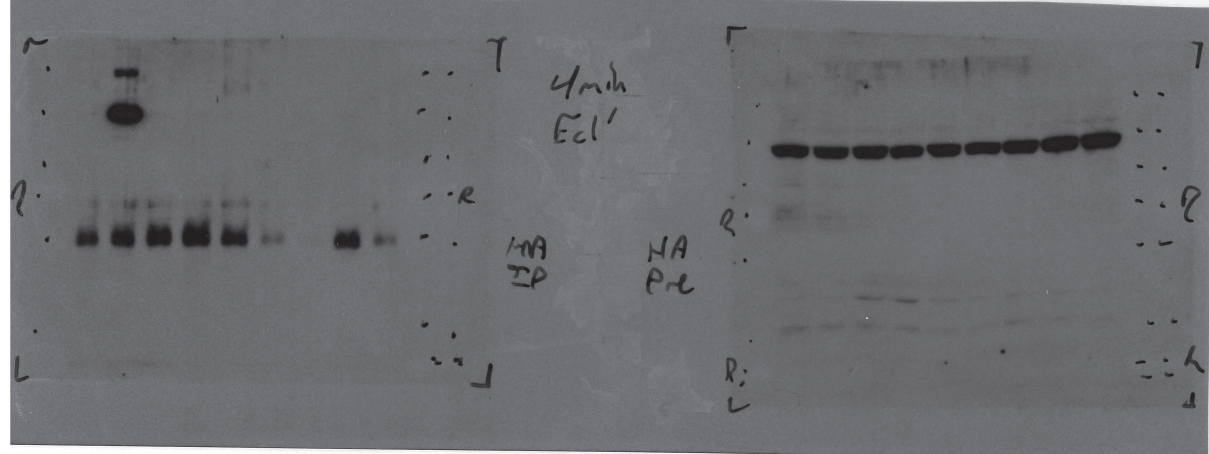

Supplement: fig3-data3 [file Figure 3C Uncropped Blots.pdf › Figure 3C Uncropped Blots.pdf]

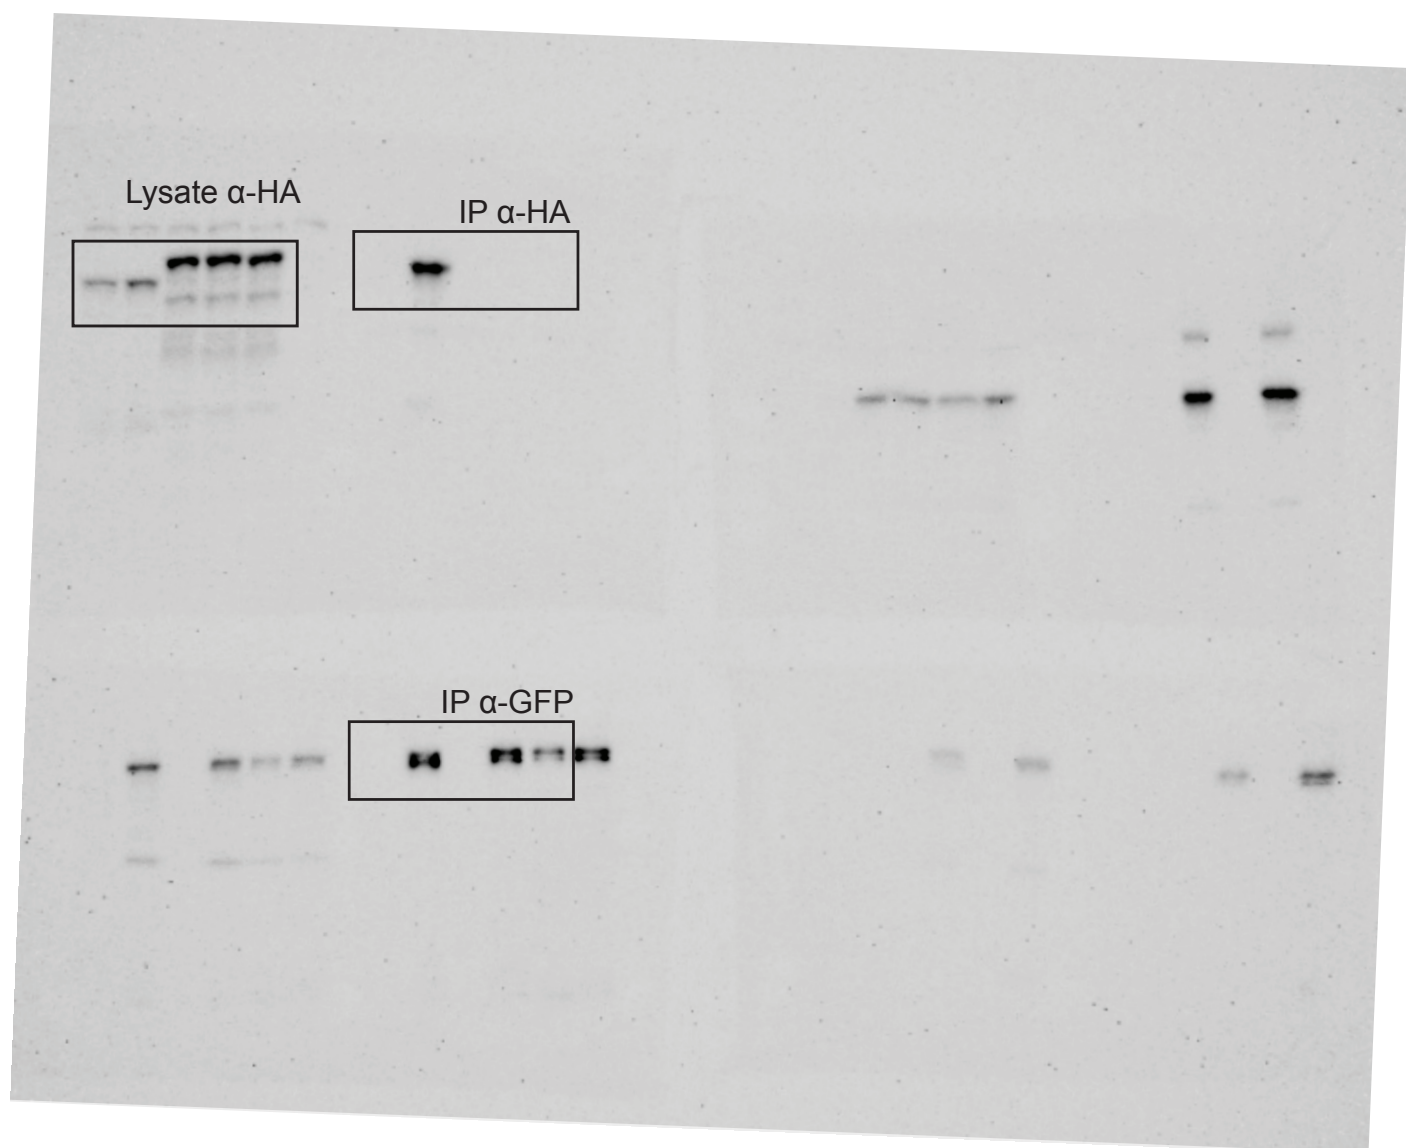

Supplement: fig3-data4 [file elife-77035-fig3-data4-v2.zip]

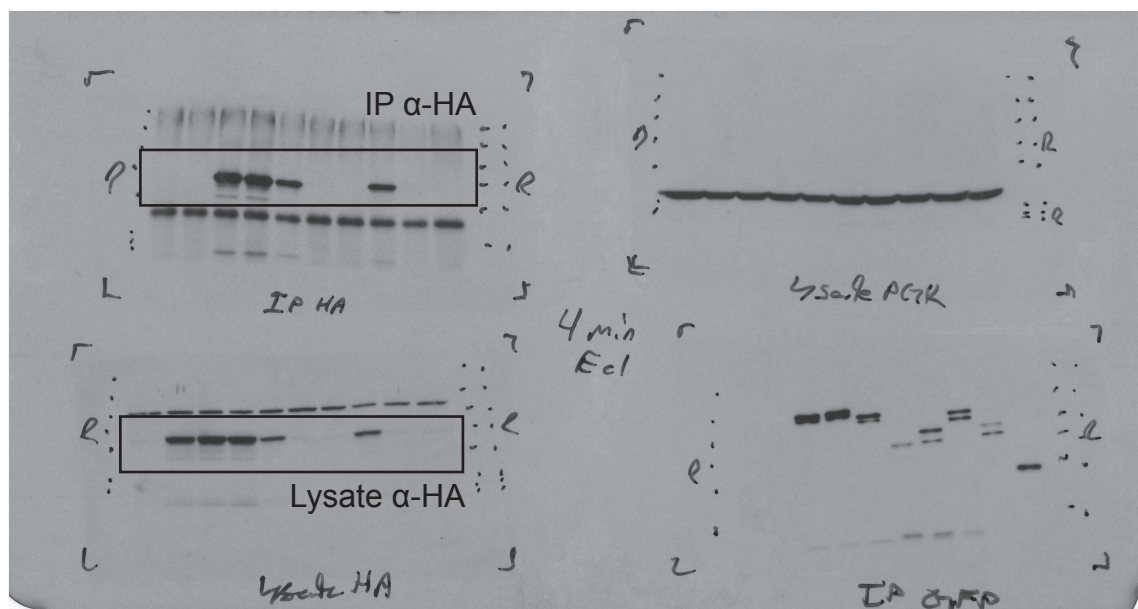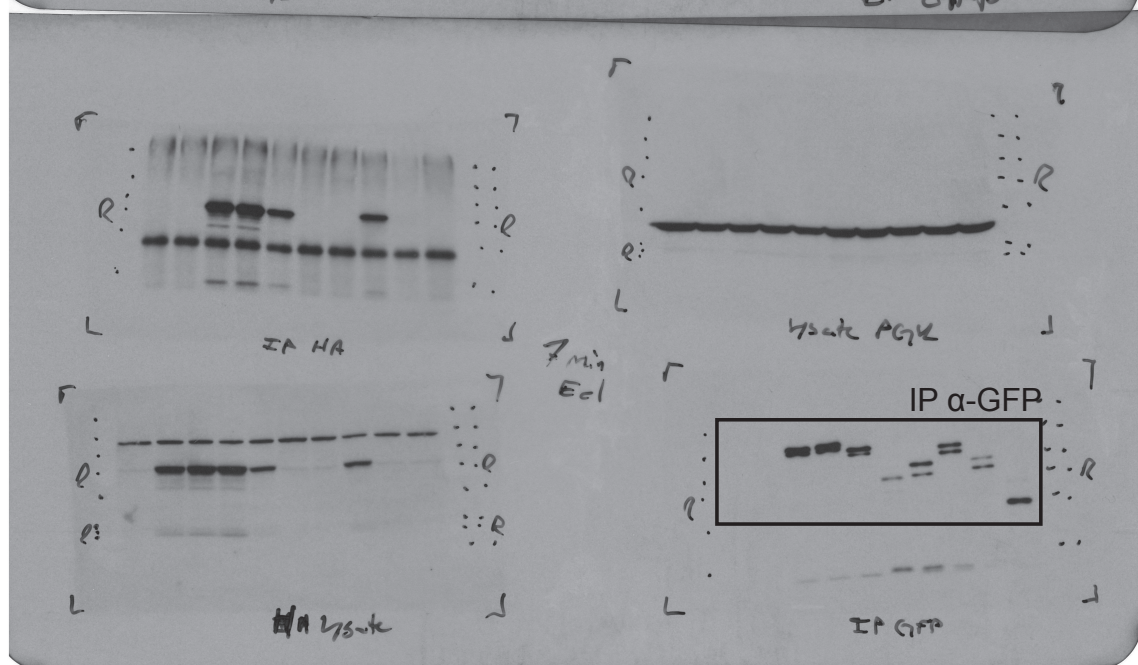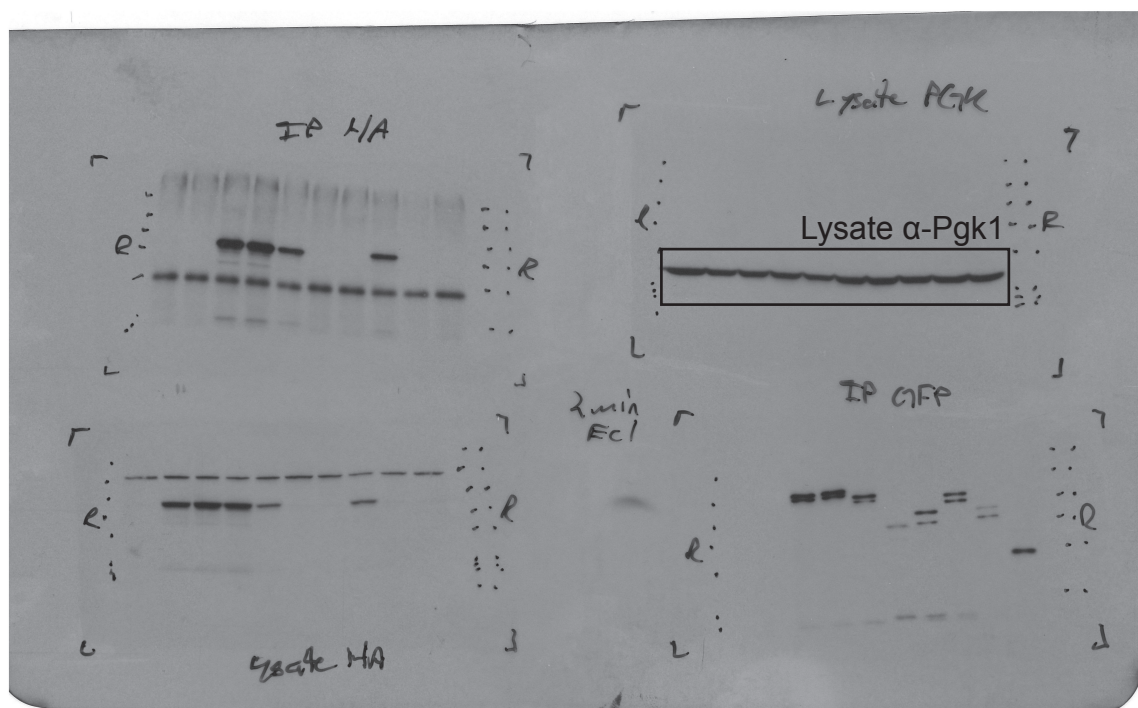

Supplement: fig3-data5 [file Figure 3I Uncropped Blots.pdf › Figure 3I Uncropped Blots.pdf]

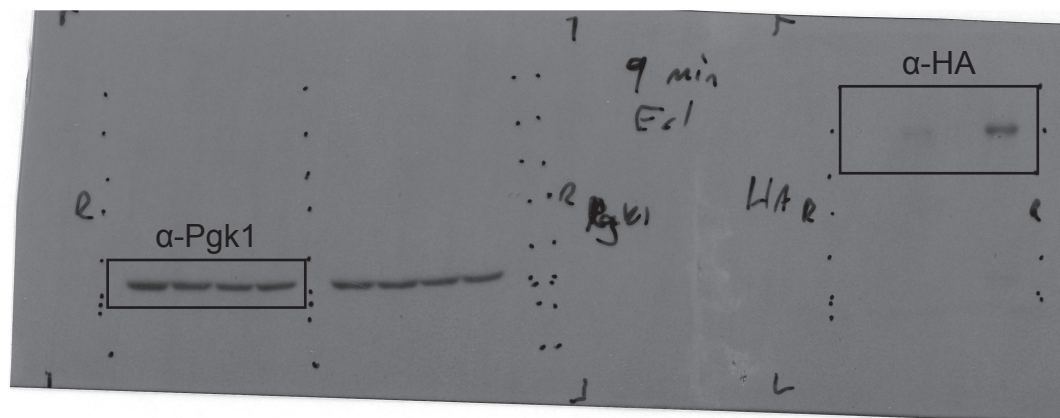

Supplement: fig3-figsupp2-data1 [file elife-77035-fig3-figsupp2-data1-v2.zip]

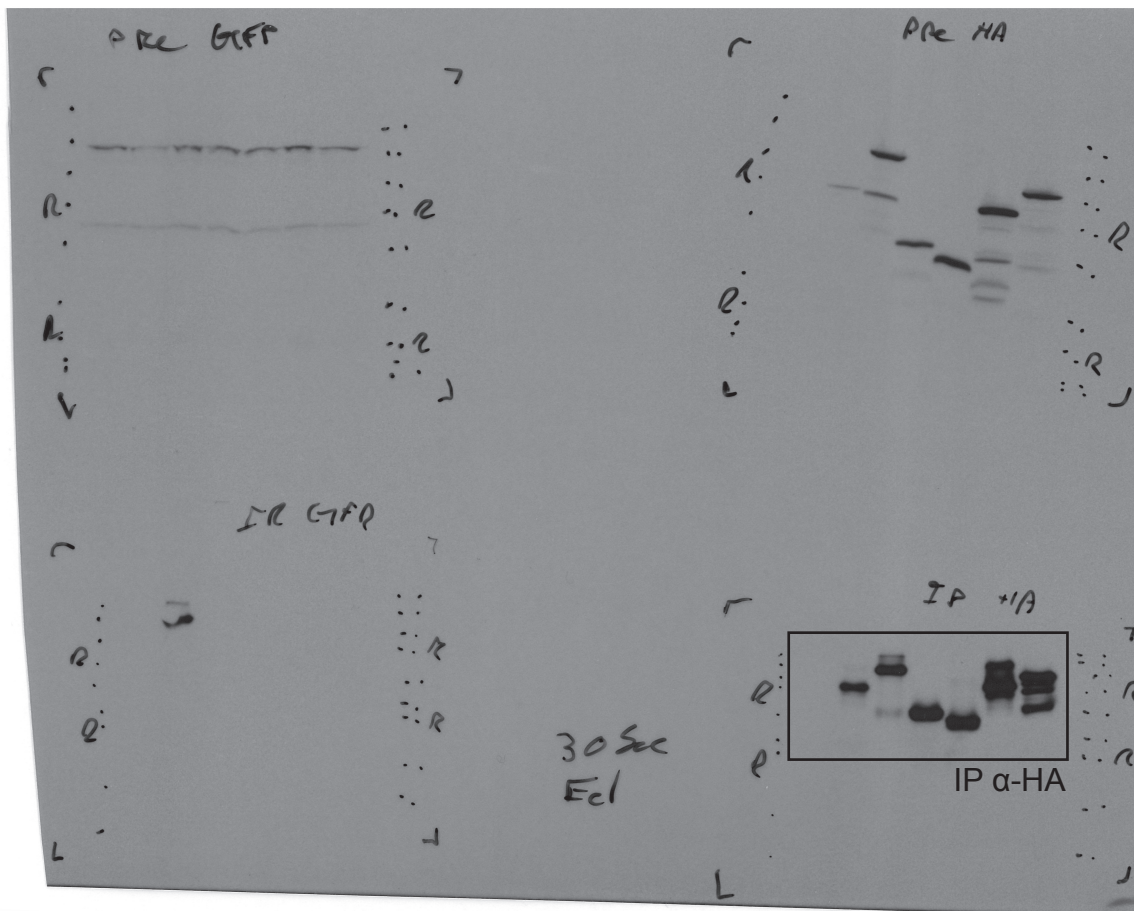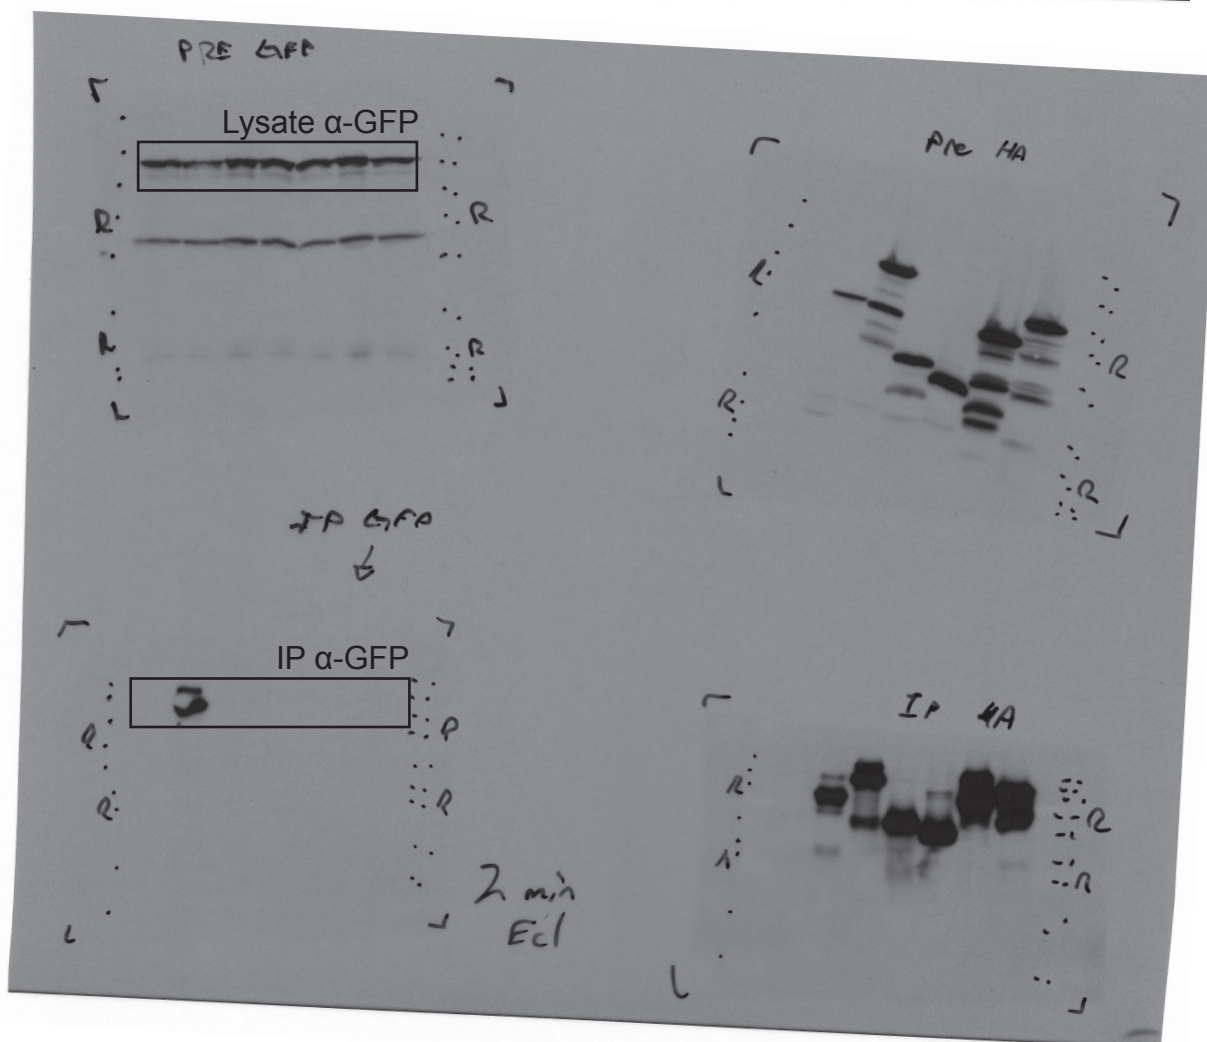

Supplement: fig3-figsupp3-data2 [file Figure 3 S3A Uncropped Blots.pdf › Figure 3 S3A Uncropped Blots.pdf]

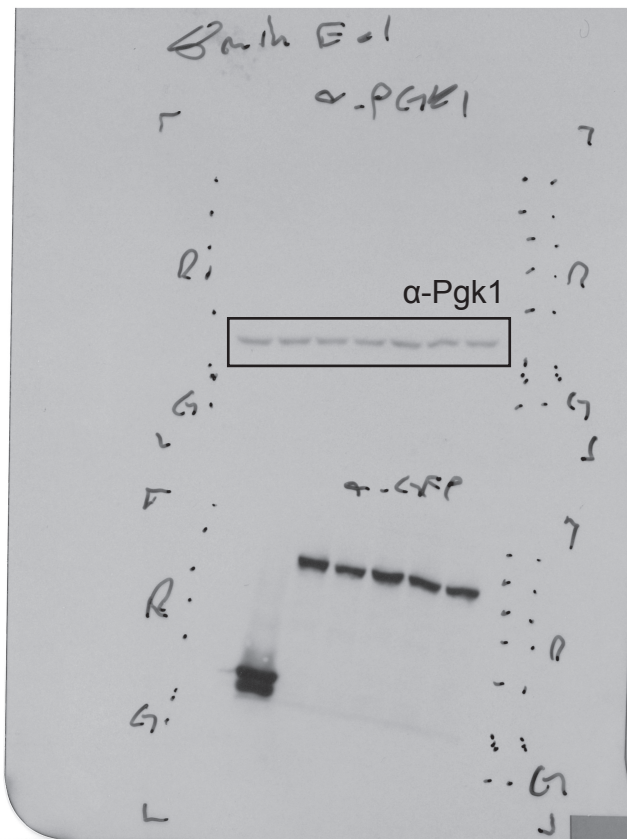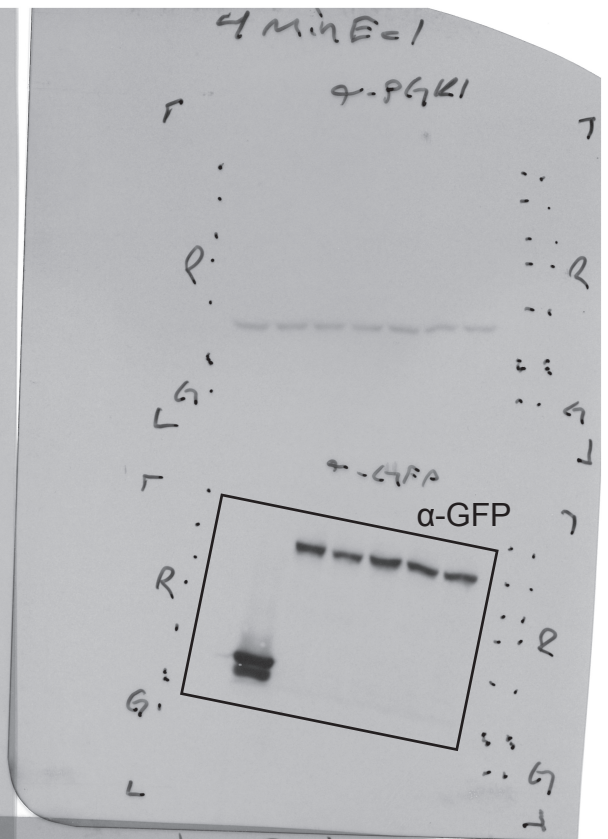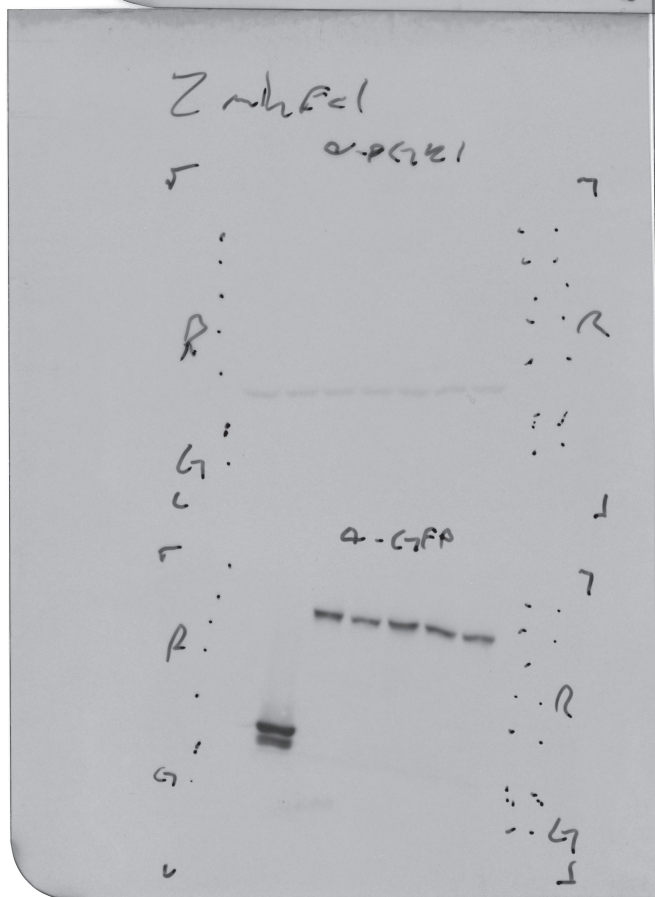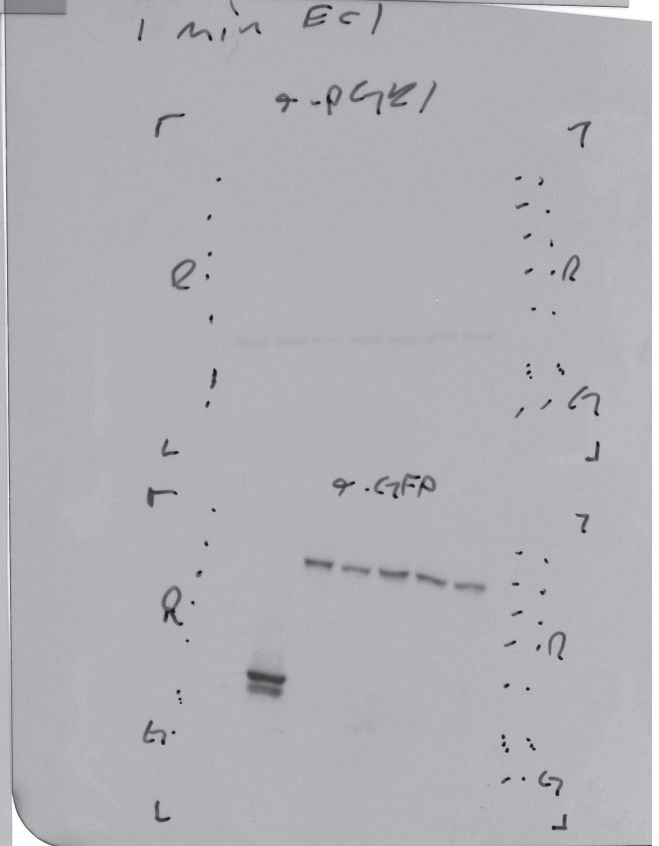

Supplement: fig5-figsupp2-data1 [file Figure 5 S2 Uncropped Blots.pdf › Figure 5 S2 Uncropped Blots.pdf]
